# Supplementary material
Source: MDPI journal article supplement (https://www.mdpi.com/1424-2818/15/2/281)
Supplement: s1 [file s1]

Table S3. Correlation matrices for Ca after detrending.

|         | No detrending                                                                                                                                                                                                                                                                                                                                                                         | Hugershof    | Smooth spline | Derivatives |        |        |        |   |  |  |  |        |       |   |  |  |        |       |       |   |  |        |       |       |       |   |                                                                                                                                                                                                                                                                                                                                                                                                                                 |  |        |        |        |        |        |   |  |  |  |        |              |   |  |  |        |              |              |   |  |        |              |              |              |   |                                                                                                                                                                                                                                                                                                                                                                                                                   |  |        |        |        |        |        |   |  |  |  |        |       |   |  |  |        |              |              |   |  |        |              |              |              |   |                                                                                                                                                                                                                                                                                                                                                                                                                   |  |        |        |        |        |        |   |  |  |  |        |              |   |  |  |        |              |              |   |  |        |              |              |              |   |
|---------|---------------------------------------------------------------------------------------------------------------------------------------------------------------------------------------------------------------------------------------------------------------------------------------------------------------------------------------------------------------------------------------|--------------|---------------|-------------|--------|--------|--------|---|--|--|--|--------|-------|---|--|--|--------|-------|-------|---|--|--------|-------|-------|-------|---|---------------------------------------------------------------------------------------------------------------------------------------------------------------------------------------------------------------------------------------------------------------------------------------------------------------------------------------------------------------------------------------------------------------------------------|--|--------|--------|--------|--------|--------|---|--|--|--|--------|--------------|---|--|--|--------|--------------|--------------|---|--|--------|--------------|--------------|--------------|---|-------------------------------------------------------------------------------------------------------------------------------------------------------------------------------------------------------------------------------------------------------------------------------------------------------------------------------------------------------------------------------------------------------------------|--|--------|--------|--------|--------|--------|---|--|--|--|--------|-------|---|--|--|--------|--------------|--------------|---|--|--------|--------------|--------------|--------------|---|-------------------------------------------------------------------------------------------------------------------------------------------------------------------------------------------------------------------------------------------------------------------------------------------------------------------------------------------------------------------------------------------------------------------|--|--------|--------|--------|--------|--------|---|--|--|--|--------|--------------|---|--|--|--------|--------------|--------------|---|--|--------|--------------|--------------|--------------|---|
| pine #1 | <table> <tr><th></th><th>Ca_eas</th><th>Ca_wes</th><th>Ca_nor</th><th>Ca_sou</th></tr> <tr><th>Ca_eas</th><td>1</td><td></td><td></td><td></td></tr> <tr><th>Ca_wes</th><td>0.763</td><td>1</td><td></td><td></td></tr> <tr><th>Ca_nor</th><td>0.763</td><td>0.904</td><td>1</td><td></td></tr> <tr><th>Ca_sou</th><td>0.787</td><td>0.904</td><td>0.895</td><td>1</td></tr> </table> |              | Ca_eas        | Ca_wes      | Ca_nor | Ca_sou | Ca_eas | 1 |  |  |  | Ca_wes | 0.763 | 1 |  |  | Ca_nor | 0.763 | 0.904 | 1 |  | Ca_sou | 0.787 | 0.904 | 0.895 | 1 | <table> <tr><th></th><th>Ca_eas</th><th>Ca_wes</th><th>Ca_nor</th><th>Ca_sou</th></tr> <tr><th>Ca_eas</th><td>1</td><td></td><td></td><td></td></tr> <tr><th>Ca_wes</th><td>-0.039</td><td>1</td><td></td><td></td></tr> <tr><th>Ca_nor</th><td>0.193</td><td><b>0.407</b></td><td>1</td><td></td></tr> <tr><th>Ca_sou</th><td>-0.119</td><td><b>0.516</b></td><td><b>0.628</b></td><td>1</td></tr> </table>                    |  | Ca_eas | Ca_wes | Ca_nor | Ca_sou | Ca_eas | 1 |  |  |  | Ca_wes | -0.039       | 1 |  |  | Ca_nor | 0.193        | <b>0.407</b> | 1 |  | Ca_sou | -0.119       | <b>0.516</b> | <b>0.628</b> | 1 | <table> <tr><th></th><th>Ca_eas</th><th>Ca_wes</th><th>Ca_nor</th><th>Ca_sou</th></tr> <tr><th>Ca_eas</th><td>1</td><td></td><td></td><td></td></tr> <tr><th>Ca_wes</th><td>0.211</td><td>1</td><td></td><td></td></tr> <tr><th>Ca_nor</th><td><b>0.347</b></td><td><b>0.373</b></td><td>1</td><td></td></tr> <tr><th>Ca_sou</th><td>0.102</td><td><b>0.317</b></td><td><b>0.303</b></td><td>1</td></tr> </table> |  | Ca_eas | Ca_wes | Ca_nor | Ca_sou | Ca_eas | 1 |  |  |  | Ca_wes | 0.211 | 1 |  |  | Ca_nor | <b>0.347</b> | <b>0.373</b> | 1 |  | Ca_sou | 0.102        | <b>0.317</b> | <b>0.303</b> | 1 | <table> <tr><th></th><th>Ca_eas</th><th>Ca_wes</th><th>Ca_nor</th><th>Ca_sou</th></tr> <tr><th>Ca_eas</th><td>1</td><td></td><td></td><td></td></tr> <tr><th>Ca_wes</th><td>0.187</td><td>1</td><td></td><td></td></tr> <tr><th>Ca_nor</th><td><b>0.336</b></td><td><b>0.449</b></td><td>1</td><td></td></tr> <tr><th>Ca_sou</th><td>0.142</td><td><b>0.381</b></td><td><b>0.424</b></td><td>1</td></tr> </table> |  | Ca_eas | Ca_wes | Ca_nor | Ca_sou | Ca_eas | 1 |  |  |  | Ca_wes | 0.187        | 1 |  |  | Ca_nor | <b>0.336</b> | <b>0.449</b> | 1 |  | Ca_sou | 0.142        | <b>0.381</b> | <b>0.424</b> | 1 |
|         | Ca_eas                                                                                                                                                                                                                                                                                                                                                                                | Ca_wes       | Ca_nor        | Ca_sou      |        |        |        |   |  |  |  |        |       |   |  |  |        |       |       |   |  |        |       |       |       |   |                                                                                                                                                                                                                                                                                                                                                                                                                                 |  |        |        |        |        |        |   |  |  |  |        |              |   |  |  |        |              |              |   |  |        |              |              |              |   |                                                                                                                                                                                                                                                                                                                                                                                                                   |  |        |        |        |        |        |   |  |  |  |        |       |   |  |  |        |              |              |   |  |        |              |              |              |   |                                                                                                                                                                                                                                                                                                                                                                                                                   |  |        |        |        |        |        |   |  |  |  |        |              |   |  |  |        |              |              |   |  |        |              |              |              |   |
| Ca_eas  | 1                                                                                                                                                                                                                                                                                                                                                                                     |              |               |             |        |        |        |   |  |  |  |        |       |   |  |  |        |       |       |   |  |        |       |       |       |   |                                                                                                                                                                                                                                                                                                                                                                                                                                 |  |        |        |        |        |        |   |  |  |  |        |              |   |  |  |        |              |              |   |  |        |              |              |              |   |                                                                                                                                                                                                                                                                                                                                                                                                                   |  |        |        |        |        |        |   |  |  |  |        |       |   |  |  |        |              |              |   |  |        |              |              |              |   |                                                                                                                                                                                                                                                                                                                                                                                                                   |  |        |        |        |        |        |   |  |  |  |        |              |   |  |  |        |              |              |   |  |        |              |              |              |   |
| Ca_wes  | 0.763                                                                                                                                                                                                                                                                                                                                                                                 | 1            |               |             |        |        |        |   |  |  |  |        |       |   |  |  |        |       |       |   |  |        |       |       |       |   |                                                                                                                                                                                                                                                                                                                                                                                                                                 |  |        |        |        |        |        |   |  |  |  |        |              |   |  |  |        |              |              |   |  |        |              |              |              |   |                                                                                                                                                                                                                                                                                                                                                                                                                   |  |        |        |        |        |        |   |  |  |  |        |       |   |  |  |        |              |              |   |  |        |              |              |              |   |                                                                                                                                                                                                                                                                                                                                                                                                                   |  |        |        |        |        |        |   |  |  |  |        |              |   |  |  |        |              |              |   |  |        |              |              |              |   |
| Ca_nor  | 0.763                                                                                                                                                                                                                                                                                                                                                                                 | 0.904        | 1             |             |        |        |        |   |  |  |  |        |       |   |  |  |        |       |       |   |  |        |       |       |       |   |                                                                                                                                                                                                                                                                                                                                                                                                                                 |  |        |        |        |        |        |   |  |  |  |        |              |   |  |  |        |              |              |   |  |        |              |              |              |   |                                                                                                                                                                                                                                                                                                                                                                                                                   |  |        |        |        |        |        |   |  |  |  |        |       |   |  |  |        |              |              |   |  |        |              |              |              |   |                                                                                                                                                                                                                                                                                                                                                                                                                   |  |        |        |        |        |        |   |  |  |  |        |              |   |  |  |        |              |              |   |  |        |              |              |              |   |
| Ca_sou  | 0.787                                                                                                                                                                                                                                                                                                                                                                                 | 0.904        | 0.895         | 1           |        |        |        |   |  |  |  |        |       |   |  |  |        |       |       |   |  |        |       |       |       |   |                                                                                                                                                                                                                                                                                                                                                                                                                                 |  |        |        |        |        |        |   |  |  |  |        |              |   |  |  |        |              |              |   |  |        |              |              |              |   |                                                                                                                                                                                                                                                                                                                                                                                                                   |  |        |        |        |        |        |   |  |  |  |        |       |   |  |  |        |              |              |   |  |        |              |              |              |   |                                                                                                                                                                                                                                                                                                                                                                                                                   |  |        |        |        |        |        |   |  |  |  |        |              |   |  |  |        |              |              |   |  |        |              |              |              |   |
|         | Ca_eas                                                                                                                                                                                                                                                                                                                                                                                | Ca_wes       | Ca_nor        | Ca_sou      |        |        |        |   |  |  |  |        |       |   |  |  |        |       |       |   |  |        |       |       |       |   |                                                                                                                                                                                                                                                                                                                                                                                                                                 |  |        |        |        |        |        |   |  |  |  |        |              |   |  |  |        |              |              |   |  |        |              |              |              |   |                                                                                                                                                                                                                                                                                                                                                                                                                   |  |        |        |        |        |        |   |  |  |  |        |       |   |  |  |        |              |              |   |  |        |              |              |              |   |                                                                                                                                                                                                                                                                                                                                                                                                                   |  |        |        |        |        |        |   |  |  |  |        |              |   |  |  |        |              |              |   |  |        |              |              |              |   |
| Ca_eas  | 1                                                                                                                                                                                                                                                                                                                                                                                     |              |               |             |        |        |        |   |  |  |  |        |       |   |  |  |        |       |       |   |  |        |       |       |       |   |                                                                                                                                                                                                                                                                                                                                                                                                                                 |  |        |        |        |        |        |   |  |  |  |        |              |   |  |  |        |              |              |   |  |        |              |              |              |   |                                                                                                                                                                                                                                                                                                                                                                                                                   |  |        |        |        |        |        |   |  |  |  |        |       |   |  |  |        |              |              |   |  |        |              |              |              |   |                                                                                                                                                                                                                                                                                                                                                                                                                   |  |        |        |        |        |        |   |  |  |  |        |              |   |  |  |        |              |              |   |  |        |              |              |              |   |
| Ca_wes  | -0.039                                                                                                                                                                                                                                                                                                                                                                                | 1            |               |             |        |        |        |   |  |  |  |        |       |   |  |  |        |       |       |   |  |        |       |       |       |   |                                                                                                                                                                                                                                                                                                                                                                                                                                 |  |        |        |        |        |        |   |  |  |  |        |              |   |  |  |        |              |              |   |  |        |              |              |              |   |                                                                                                                                                                                                                                                                                                                                                                                                                   |  |        |        |        |        |        |   |  |  |  |        |       |   |  |  |        |              |              |   |  |        |              |              |              |   |                                                                                                                                                                                                                                                                                                                                                                                                                   |  |        |        |        |        |        |   |  |  |  |        |              |   |  |  |        |              |              |   |  |        |              |              |              |   |
| Ca_nor  | 0.193                                                                                                                                                                                                                                                                                                                                                                                 | <b>0.407</b> | 1             |             |        |        |        |   |  |  |  |        |       |   |  |  |        |       |       |   |  |        |       |       |       |   |                                                                                                                                                                                                                                                                                                                                                                                                                                 |  |        |        |        |        |        |   |  |  |  |        |              |   |  |  |        |              |              |   |  |        |              |              |              |   |                                                                                                                                                                                                                                                                                                                                                                                                                   |  |        |        |        |        |        |   |  |  |  |        |       |   |  |  |        |              |              |   |  |        |              |              |              |   |                                                                                                                                                                                                                                                                                                                                                                                                                   |  |        |        |        |        |        |   |  |  |  |        |              |   |  |  |        |              |              |   |  |        |              |              |              |   |
| Ca_sou  | -0.119                                                                                                                                                                                                                                                                                                                                                                                | <b>0.516</b> | <b>0.628</b>  | 1           |        |        |        |   |  |  |  |        |       |   |  |  |        |       |       |   |  |        |       |       |       |   |                                                                                                                                                                                                                                                                                                                                                                                                                                 |  |        |        |        |        |        |   |  |  |  |        |              |   |  |  |        |              |              |   |  |        |              |              |              |   |                                                                                                                                                                                                                                                                                                                                                                                                                   |  |        |        |        |        |        |   |  |  |  |        |       |   |  |  |        |              |              |   |  |        |              |              |              |   |                                                                                                                                                                                                                                                                                                                                                                                                                   |  |        |        |        |        |        |   |  |  |  |        |              |   |  |  |        |              |              |   |  |        |              |              |              |   |
|         | Ca_eas                                                                                                                                                                                                                                                                                                                                                                                | Ca_wes       | Ca_nor        | Ca_sou      |        |        |        |   |  |  |  |        |       |   |  |  |        |       |       |   |  |        |       |       |       |   |                                                                                                                                                                                                                                                                                                                                                                                                                                 |  |        |        |        |        |        |   |  |  |  |        |              |   |  |  |        |              |              |   |  |        |              |              |              |   |                                                                                                                                                                                                                                                                                                                                                                                                                   |  |        |        |        |        |        |   |  |  |  |        |       |   |  |  |        |              |              |   |  |        |              |              |              |   |                                                                                                                                                                                                                                                                                                                                                                                                                   |  |        |        |        |        |        |   |  |  |  |        |              |   |  |  |        |              |              |   |  |        |              |              |              |   |
| Ca_eas  | 1                                                                                                                                                                                                                                                                                                                                                                                     |              |               |             |        |        |        |   |  |  |  |        |       |   |  |  |        |       |       |   |  |        |       |       |       |   |                                                                                                                                                                                                                                                                                                                                                                                                                                 |  |        |        |        |        |        |   |  |  |  |        |              |   |  |  |        |              |              |   |  |        |              |              |              |   |                                                                                                                                                                                                                                                                                                                                                                                                                   |  |        |        |        |        |        |   |  |  |  |        |       |   |  |  |        |              |              |   |  |        |              |              |              |   |                                                                                                                                                                                                                                                                                                                                                                                                                   |  |        |        |        |        |        |   |  |  |  |        |              |   |  |  |        |              |              |   |  |        |              |              |              |   |
| Ca_wes  | 0.211                                                                                                                                                                                                                                                                                                                                                                                 | 1            |               |             |        |        |        |   |  |  |  |        |       |   |  |  |        |       |       |   |  |        |       |       |       |   |                                                                                                                                                                                                                                                                                                                                                                                                                                 |  |        |        |        |        |        |   |  |  |  |        |              |   |  |  |        |              |              |   |  |        |              |              |              |   |                                                                                                                                                                                                                                                                                                                                                                                                                   |  |        |        |        |        |        |   |  |  |  |        |       |   |  |  |        |              |              |   |  |        |              |              |              |   |                                                                                                                                                                                                                                                                                                                                                                                                                   |  |        |        |        |        |        |   |  |  |  |        |              |   |  |  |        |              |              |   |  |        |              |              |              |   |
| Ca_nor  | <b>0.347</b>                                                                                                                                                                                                                                                                                                                                                                          | <b>0.373</b> | 1             |             |        |        |        |   |  |  |  |        |       |   |  |  |        |       |       |   |  |        |       |       |       |   |                                                                                                                                                                                                                                                                                                                                                                                                                                 |  |        |        |        |        |        |   |  |  |  |        |              |   |  |  |        |              |              |   |  |        |              |              |              |   |                                                                                                                                                                                                                                                                                                                                                                                                                   |  |        |        |        |        |        |   |  |  |  |        |       |   |  |  |        |              |              |   |  |        |              |              |              |   |                                                                                                                                                                                                                                                                                                                                                                                                                   |  |        |        |        |        |        |   |  |  |  |        |              |   |  |  |        |              |              |   |  |        |              |              |              |   |
| Ca_sou  | 0.102                                                                                                                                                                                                                                                                                                                                                                                 | <b>0.317</b> | <b>0.303</b>  | 1           |        |        |        |   |  |  |  |        |       |   |  |  |        |       |       |   |  |        |       |       |       |   |                                                                                                                                                                                                                                                                                                                                                                                                                                 |  |        |        |        |        |        |   |  |  |  |        |              |   |  |  |        |              |              |   |  |        |              |              |              |   |                                                                                                                                                                                                                                                                                                                                                                                                                   |  |        |        |        |        |        |   |  |  |  |        |       |   |  |  |        |              |              |   |  |        |              |              |              |   |                                                                                                                                                                                                                                                                                                                                                                                                                   |  |        |        |        |        |        |   |  |  |  |        |              |   |  |  |        |              |              |   |  |        |              |              |              |   |
|         | Ca_eas                                                                                                                                                                                                                                                                                                                                                                                | Ca_wes       | Ca_nor        | Ca_sou      |        |        |        |   |  |  |  |        |       |   |  |  |        |       |       |   |  |        |       |       |       |   |                                                                                                                                                                                                                                                                                                                                                                                                                                 |  |        |        |        |        |        |   |  |  |  |        |              |   |  |  |        |              |              |   |  |        |              |              |              |   |                                                                                                                                                                                                                                                                                                                                                                                                                   |  |        |        |        |        |        |   |  |  |  |        |       |   |  |  |        |              |              |   |  |        |              |              |              |   |                                                                                                                                                                                                                                                                                                                                                                                                                   |  |        |        |        |        |        |   |  |  |  |        |              |   |  |  |        |              |              |   |  |        |              |              |              |   |
| Ca_eas  | 1                                                                                                                                                                                                                                                                                                                                                                                     |              |               |             |        |        |        |   |  |  |  |        |       |   |  |  |        |       |       |   |  |        |       |       |       |   |                                                                                                                                                                                                                                                                                                                                                                                                                                 |  |        |        |        |        |        |   |  |  |  |        |              |   |  |  |        |              |              |   |  |        |              |              |              |   |                                                                                                                                                                                                                                                                                                                                                                                                                   |  |        |        |        |        |        |   |  |  |  |        |       |   |  |  |        |              |              |   |  |        |              |              |              |   |                                                                                                                                                                                                                                                                                                                                                                                                                   |  |        |        |        |        |        |   |  |  |  |        |              |   |  |  |        |              |              |   |  |        |              |              |              |   |
| Ca_wes  | 0.187                                                                                                                                                                                                                                                                                                                                                                                 | 1            |               |             |        |        |        |   |  |  |  |        |       |   |  |  |        |       |       |   |  |        |       |       |       |   |                                                                                                                                                                                                                                                                                                                                                                                                                                 |  |        |        |        |        |        |   |  |  |  |        |              |   |  |  |        |              |              |   |  |        |              |              |              |   |                                                                                                                                                                                                                                                                                                                                                                                                                   |  |        |        |        |        |        |   |  |  |  |        |       |   |  |  |        |              |              |   |  |        |              |              |              |   |                                                                                                                                                                                                                                                                                                                                                                                                                   |  |        |        |        |        |        |   |  |  |  |        |              |   |  |  |        |              |              |   |  |        |              |              |              |   |
| Ca_nor  | <b>0.336</b>                                                                                                                                                                                                                                                                                                                                                                          | <b>0.449</b> | 1             |             |        |        |        |   |  |  |  |        |       |   |  |  |        |       |       |   |  |        |       |       |       |   |                                                                                                                                                                                                                                                                                                                                                                                                                                 |  |        |        |        |        |        |   |  |  |  |        |              |   |  |  |        |              |              |   |  |        |              |              |              |   |                                                                                                                                                                                                                                                                                                                                                                                                                   |  |        |        |        |        |        |   |  |  |  |        |       |   |  |  |        |              |              |   |  |        |              |              |              |   |                                                                                                                                                                                                                                                                                                                                                                                                                   |  |        |        |        |        |        |   |  |  |  |        |              |   |  |  |        |              |              |   |  |        |              |              |              |   |
| Ca_sou  | 0.142                                                                                                                                                                                                                                                                                                                                                                                 | <b>0.381</b> | <b>0.424</b>  | 1           |        |        |        |   |  |  |  |        |       |   |  |  |        |       |       |   |  |        |       |       |       |   |                                                                                                                                                                                                                                                                                                                                                                                                                                 |  |        |        |        |        |        |   |  |  |  |        |              |   |  |  |        |              |              |   |  |        |              |              |              |   |                                                                                                                                                                                                                                                                                                                                                                                                                   |  |        |        |        |        |        |   |  |  |  |        |       |   |  |  |        |              |              |   |  |        |              |              |              |   |                                                                                                                                                                                                                                                                                                                                                                                                                   |  |        |        |        |        |        |   |  |  |  |        |              |   |  |  |        |              |              |   |  |        |              |              |              |   |
| pine #2 | <table> <tr><th></th><th>Ca_eas</th><th>Ca_wes</th><th>Ca_nor</th><th>Ca_sou</th></tr> <tr><th>Ca_eas</th><td>1</td><td></td><td></td><td></td></tr> <tr><th>Ca_wes</th><td>0.903</td><td>1</td><td></td><td></td></tr> <tr><th>Ca_nor</th><td>0.931</td><td>0.880</td><td>1</td><td></td></tr> <tr><th>Ca_sou</th><td>0.887</td><td>0.883</td><td>0.897</td><td>1</td></tr> </table> |              | Ca_eas        | Ca_wes      | Ca_nor | Ca_sou | Ca_eas | 1 |  |  |  | Ca_wes | 0.903 | 1 |  |  | Ca_nor | 0.931 | 0.880 | 1 |  | Ca_sou | 0.887 | 0.883 | 0.897 | 1 | <table> <tr><th></th><th>Ca_eas</th><th>Ca_wes</th><th>Ca_nor</th><th>Ca_sou</th></tr> <tr><th>Ca_eas</th><td>1</td><td></td><td></td><td></td></tr> <tr><th>Ca_wes</th><td>0.161</td><td>1</td><td></td><td></td></tr> <tr><th>Ca_nor</th><td><b>0.419</b></td><td>-0.006</td><td>1</td><td></td></tr> <tr><th>Ca_sou</th><td>0.077</td><td>0.022</td><td><b>0.507</b></td><td>1</td></tr> </table>                            |  | Ca_eas | Ca_wes | Ca_nor | Ca_sou | Ca_eas | 1 |  |  |  | Ca_wes | 0.161        | 1 |  |  | Ca_nor | <b>0.419</b> | -0.006       | 1 |  | Ca_sou | 0.077        | 0.022        | <b>0.507</b> | 1 | <table> <tr><th></th><th>Ca_eas</th><th>Ca_wes</th><th>Ca_nor</th><th>Ca_sou</th></tr> <tr><th>Ca_eas</th><td>1</td><td></td><td></td><td></td></tr> <tr><th>Ca_wes</th><td>0.139</td><td>1</td><td></td><td></td></tr> <tr><th>Ca_nor</th><td>0.146</td><td>0.081</td><td>1</td><td></td></tr> <tr><th>Ca_sou</th><td>-0.012</td><td>-0.143</td><td>-0.115</td><td>1</td></tr> </table>                          |  | Ca_eas | Ca_wes | Ca_nor | Ca_sou | Ca_eas | 1 |  |  |  | Ca_wes | 0.139 | 1 |  |  | Ca_nor | 0.146        | 0.081        | 1 |  | Ca_sou | -0.012       | -0.143       | -0.115       | 1 | <table> <tr><th></th><th>Ca_eas</th><th>Ca_wes</th><th>Ca_nor</th><th>Ca_sou</th></tr> <tr><th>Ca_eas</th><td>1</td><td></td><td></td><td></td></tr> <tr><th>Ca_wes</th><td><b>0.227</b></td><td>1</td><td></td><td></td></tr> <tr><th>Ca_nor</th><td>0.218</td><td>0.127</td><td>1</td><td></td></tr> <tr><th>Ca_sou</th><td>-0.021</td><td>-0.243</td><td>-0.080</td><td>1</td></tr> </table>                   |  | Ca_eas | Ca_wes | Ca_nor | Ca_sou | Ca_eas | 1 |  |  |  | Ca_wes | <b>0.227</b> | 1 |  |  | Ca_nor | 0.218        | 0.127        | 1 |  | Ca_sou | -0.021       | -0.243       | -0.080       | 1 |
|         | Ca_eas                                                                                                                                                                                                                                                                                                                                                                                | Ca_wes       | Ca_nor        | Ca_sou      |        |        |        |   |  |  |  |        |       |   |  |  |        |       |       |   |  |        |       |       |       |   |                                                                                                                                                                                                                                                                                                                                                                                                                                 |  |        |        |        |        |        |   |  |  |  |        |              |   |  |  |        |              |              |   |  |        |              |              |              |   |                                                                                                                                                                                                                                                                                                                                                                                                                   |  |        |        |        |        |        |   |  |  |  |        |       |   |  |  |        |              |              |   |  |        |              |              |              |   |                                                                                                                                                                                                                                                                                                                                                                                                                   |  |        |        |        |        |        |   |  |  |  |        |              |   |  |  |        |              |              |   |  |        |              |              |              |   |
| Ca_eas  | 1                                                                                                                                                                                                                                                                                                                                                                                     |              |               |             |        |        |        |   |  |  |  |        |       |   |  |  |        |       |       |   |  |        |       |       |       |   |                                                                                                                                                                                                                                                                                                                                                                                                                                 |  |        |        |        |        |        |   |  |  |  |        |              |   |  |  |        |              |              |   |  |        |              |              |              |   |                                                                                                                                                                                                                                                                                                                                                                                                                   |  |        |        |        |        |        |   |  |  |  |        |       |   |  |  |        |              |              |   |  |        |              |              |              |   |                                                                                                                                                                                                                                                                                                                                                                                                                   |  |        |        |        |        |        |   |  |  |  |        |              |   |  |  |        |              |              |   |  |        |              |              |              |   |
| Ca_wes  | 0.903                                                                                                                                                                                                                                                                                                                                                                                 | 1            |               |             |        |        |        |   |  |  |  |        |       |   |  |  |        |       |       |   |  |        |       |       |       |   |                                                                                                                                                                                                                                                                                                                                                                                                                                 |  |        |        |        |        |        |   |  |  |  |        |              |   |  |  |        |              |              |   |  |        |              |              |              |   |                                                                                                                                                                                                                                                                                                                                                                                                                   |  |        |        |        |        |        |   |  |  |  |        |       |   |  |  |        |              |              |   |  |        |              |              |              |   |                                                                                                                                                                                                                                                                                                                                                                                                                   |  |        |        |        |        |        |   |  |  |  |        |              |   |  |  |        |              |              |   |  |        |              |              |              |   |
| Ca_nor  | 0.931                                                                                                                                                                                                                                                                                                                                                                                 | 0.880        | 1             |             |        |        |        |   |  |  |  |        |       |   |  |  |        |       |       |   |  |        |       |       |       |   |                                                                                                                                                                                                                                                                                                                                                                                                                                 |  |        |        |        |        |        |   |  |  |  |        |              |   |  |  |        |              |              |   |  |        |              |              |              |   |                                                                                                                                                                                                                                                                                                                                                                                                                   |  |        |        |        |        |        |   |  |  |  |        |       |   |  |  |        |              |              |   |  |        |              |              |              |   |                                                                                                                                                                                                                                                                                                                                                                                                                   |  |        |        |        |        |        |   |  |  |  |        |              |   |  |  |        |              |              |   |  |        |              |              |              |   |
| Ca_sou  | 0.887                                                                                                                                                                                                                                                                                                                                                                                 | 0.883        | 0.897         | 1           |        |        |        |   |  |  |  |        |       |   |  |  |        |       |       |   |  |        |       |       |       |   |                                                                                                                                                                                                                                                                                                                                                                                                                                 |  |        |        |        |        |        |   |  |  |  |        |              |   |  |  |        |              |              |   |  |        |              |              |              |   |                                                                                                                                                                                                                                                                                                                                                                                                                   |  |        |        |        |        |        |   |  |  |  |        |       |   |  |  |        |              |              |   |  |        |              |              |              |   |                                                                                                                                                                                                                                                                                                                                                                                                                   |  |        |        |        |        |        |   |  |  |  |        |              |   |  |  |        |              |              |   |  |        |              |              |              |   |
|         | Ca_eas                                                                                                                                                                                                                                                                                                                                                                                | Ca_wes       | Ca_nor        | Ca_sou      |        |        |        |   |  |  |  |        |       |   |  |  |        |       |       |   |  |        |       |       |       |   |                                                                                                                                                                                                                                                                                                                                                                                                                                 |  |        |        |        |        |        |   |  |  |  |        |              |   |  |  |        |              |              |   |  |        |              |              |              |   |                                                                                                                                                                                                                                                                                                                                                                                                                   |  |        |        |        |        |        |   |  |  |  |        |       |   |  |  |        |              |              |   |  |        |              |              |              |   |                                                                                                                                                                                                                                                                                                                                                                                                                   |  |        |        |        |        |        |   |  |  |  |        |              |   |  |  |        |              |              |   |  |        |              |              |              |   |
| Ca_eas  | 1                                                                                                                                                                                                                                                                                                                                                                                     |              |               |             |        |        |        |   |  |  |  |        |       |   |  |  |        |       |       |   |  |        |       |       |       |   |                                                                                                                                                                                                                                                                                                                                                                                                                                 |  |        |        |        |        |        |   |  |  |  |        |              |   |  |  |        |              |              |   |  |        |              |              |              |   |                                                                                                                                                                                                                                                                                                                                                                                                                   |  |        |        |        |        |        |   |  |  |  |        |       |   |  |  |        |              |              |   |  |        |              |              |              |   |                                                                                                                                                                                                                                                                                                                                                                                                                   |  |        |        |        |        |        |   |  |  |  |        |              |   |  |  |        |              |              |   |  |        |              |              |              |   |
| Ca_wes  | 0.161                                                                                                                                                                                                                                                                                                                                                                                 | 1            |               |             |        |        |        |   |  |  |  |        |       |   |  |  |        |       |       |   |  |        |       |       |       |   |                                                                                                                                                                                                                                                                                                                                                                                                                                 |  |        |        |        |        |        |   |  |  |  |        |              |   |  |  |        |              |              |   |  |        |              |              |              |   |                                                                                                                                                                                                                                                                                                                                                                                                                   |  |        |        |        |        |        |   |  |  |  |        |       |   |  |  |        |              |              |   |  |        |              |              |              |   |                                                                                                                                                                                                                                                                                                                                                                                                                   |  |        |        |        |        |        |   |  |  |  |        |              |   |  |  |        |              |              |   |  |        |              |              |              |   |
| Ca_nor  | <b>0.419</b>                                                                                                                                                                                                                                                                                                                                                                          | -0.006       | 1             |             |        |        |        |   |  |  |  |        |       |   |  |  |        |       |       |   |  |        |       |       |       |   |                                                                                                                                                                                                                                                                                                                                                                                                                                 |  |        |        |        |        |        |   |  |  |  |        |              |   |  |  |        |              |              |   |  |        |              |              |              |   |                                                                                                                                                                                                                                                                                                                                                                                                                   |  |        |        |        |        |        |   |  |  |  |        |       |   |  |  |        |              |              |   |  |        |              |              |              |   |                                                                                                                                                                                                                                                                                                                                                                                                                   |  |        |        |        |        |        |   |  |  |  |        |              |   |  |  |        |              |              |   |  |        |              |              |              |   |
| Ca_sou  | 0.077                                                                                                                                                                                                                                                                                                                                                                                 | 0.022        | <b>0.507</b>  | 1           |        |        |        |   |  |  |  |        |       |   |  |  |        |       |       |   |  |        |       |       |       |   |                                                                                                                                                                                                                                                                                                                                                                                                                                 |  |        |        |        |        |        |   |  |  |  |        |              |   |  |  |        |              |              |   |  |        |              |              |              |   |                                                                                                                                                                                                                                                                                                                                                                                                                   |  |        |        |        |        |        |   |  |  |  |        |       |   |  |  |        |              |              |   |  |        |              |              |              |   |                                                                                                                                                                                                                                                                                                                                                                                                                   |  |        |        |        |        |        |   |  |  |  |        |              |   |  |  |        |              |              |   |  |        |              |              |              |   |
|         | Ca_eas                                                                                                                                                                                                                                                                                                                                                                                | Ca_wes       | Ca_nor        | Ca_sou      |        |        |        |   |  |  |  |        |       |   |  |  |        |       |       |   |  |        |       |       |       |   |                                                                                                                                                                                                                                                                                                                                                                                                                                 |  |        |        |        |        |        |   |  |  |  |        |              |   |  |  |        |              |              |   |  |        |              |              |              |   |                                                                                                                                                                                                                                                                                                                                                                                                                   |  |        |        |        |        |        |   |  |  |  |        |       |   |  |  |        |              |              |   |  |        |              |              |              |   |                                                                                                                                                                                                                                                                                                                                                                                                                   |  |        |        |        |        |        |   |  |  |  |        |              |   |  |  |        |              |              |   |  |        |              |              |              |   |
| Ca_eas  | 1                                                                                                                                                                                                                                                                                                                                                                                     |              |               |             |        |        |        |   |  |  |  |        |       |   |  |  |        |       |       |   |  |        |       |       |       |   |                                                                                                                                                                                                                                                                                                                                                                                                                                 |  |        |        |        |        |        |   |  |  |  |        |              |   |  |  |        |              |              |   |  |        |              |              |              |   |                                                                                                                                                                                                                                                                                                                                                                                                                   |  |        |        |        |        |        |   |  |  |  |        |       |   |  |  |        |              |              |   |  |        |              |              |              |   |                                                                                                                                                                                                                                                                                                                                                                                                                   |  |        |        |        |        |        |   |  |  |  |        |              |   |  |  |        |              |              |   |  |        |              |              |              |   |
| Ca_wes  | 0.139                                                                                                                                                                                                                                                                                                                                                                                 | 1            |               |             |        |        |        |   |  |  |  |        |       |   |  |  |        |       |       |   |  |        |       |       |       |   |                                                                                                                                                                                                                                                                                                                                                                                                                                 |  |        |        |        |        |        |   |  |  |  |        |              |   |  |  |        |              |              |   |  |        |              |              |              |   |                                                                                                                                                                                                                                                                                                                                                                                                                   |  |        |        |        |        |        |   |  |  |  |        |       |   |  |  |        |              |              |   |  |        |              |              |              |   |                                                                                                                                                                                                                                                                                                                                                                                                                   |  |        |        |        |        |        |   |  |  |  |        |              |   |  |  |        |              |              |   |  |        |              |              |              |   |
| Ca_nor  | 0.146                                                                                                                                                                                                                                                                                                                                                                                 | 0.081        | 1             |             |        |        |        |   |  |  |  |        |       |   |  |  |        |       |       |   |  |        |       |       |       |   |                                                                                                                                                                                                                                                                                                                                                                                                                                 |  |        |        |        |        |        |   |  |  |  |        |              |   |  |  |        |              |              |   |  |        |              |              |              |   |                                                                                                                                                                                                                                                                                                                                                                                                                   |  |        |        |        |        |        |   |  |  |  |        |       |   |  |  |        |              |              |   |  |        |              |              |              |   |                                                                                                                                                                                                                                                                                                                                                                                                                   |  |        |        |        |        |        |   |  |  |  |        |              |   |  |  |        |              |              |   |  |        |              |              |              |   |
| Ca_sou  | -0.012                                                                                                                                                                                                                                                                                                                                                                                | -0.143       | -0.115        | 1           |        |        |        |   |  |  |  |        |       |   |  |  |        |       |       |   |  |        |       |       |       |   |                                                                                                                                                                                                                                                                                                                                                                                                                                 |  |        |        |        |        |        |   |  |  |  |        |              |   |  |  |        |              |              |   |  |        |              |              |              |   |                                                                                                                                                                                                                                                                                                                                                                                                                   |  |        |        |        |        |        |   |  |  |  |        |       |   |  |  |        |              |              |   |  |        |              |              |              |   |                                                                                                                                                                                                                                                                                                                                                                                                                   |  |        |        |        |        |        |   |  |  |  |        |              |   |  |  |        |              |              |   |  |        |              |              |              |   |
|         | Ca_eas                                                                                                                                                                                                                                                                                                                                                                                | Ca_wes       | Ca_nor        | Ca_sou      |        |        |        |   |  |  |  |        |       |   |  |  |        |       |       |   |  |        |       |       |       |   |                                                                                                                                                                                                                                                                                                                                                                                                                                 |  |        |        |        |        |        |   |  |  |  |        |              |   |  |  |        |              |              |   |  |        |              |              |              |   |                                                                                                                                                                                                                                                                                                                                                                                                                   |  |        |        |        |        |        |   |  |  |  |        |       |   |  |  |        |              |              |   |  |        |              |              |              |   |                                                                                                                                                                                                                                                                                                                                                                                                                   |  |        |        |        |        |        |   |  |  |  |        |              |   |  |  |        |              |              |   |  |        |              |              |              |   |
| Ca_eas  | 1                                                                                                                                                                                                                                                                                                                                                                                     |              |               |             |        |        |        |   |  |  |  |        |       |   |  |  |        |       |       |   |  |        |       |       |       |   |                                                                                                                                                                                                                                                                                                                                                                                                                                 |  |        |        |        |        |        |   |  |  |  |        |              |   |  |  |        |              |              |   |  |        |              |              |              |   |                                                                                                                                                                                                                                                                                                                                                                                                                   |  |        |        |        |        |        |   |  |  |  |        |       |   |  |  |        |              |              |   |  |        |              |              |              |   |                                                                                                                                                                                                                                                                                                                                                                                                                   |  |        |        |        |        |        |   |  |  |  |        |              |   |  |  |        |              |              |   |  |        |              |              |              |   |
| Ca_wes  | <b>0.227</b>                                                                                                                                                                                                                                                                                                                                                                          | 1            |               |             |        |        |        |   |  |  |  |        |       |   |  |  |        |       |       |   |  |        |       |       |       |   |                                                                                                                                                                                                                                                                                                                                                                                                                                 |  |        |        |        |        |        |   |  |  |  |        |              |   |  |  |        |              |              |   |  |        |              |              |              |   |                                                                                                                                                                                                                                                                                                                                                                                                                   |  |        |        |        |        |        |   |  |  |  |        |       |   |  |  |        |              |              |   |  |        |              |              |              |   |                                                                                                                                                                                                                                                                                                                                                                                                                   |  |        |        |        |        |        |   |  |  |  |        |              |   |  |  |        |              |              |   |  |        |              |              |              |   |
| Ca_nor  | 0.218                                                                                                                                                                                                                                                                                                                                                                                 | 0.127        | 1             |             |        |        |        |   |  |  |  |        |       |   |  |  |        |       |       |   |  |        |       |       |       |   |                                                                                                                                                                                                                                                                                                                                                                                                                                 |  |        |        |        |        |        |   |  |  |  |        |              |   |  |  |        |              |              |   |  |        |              |              |              |   |                                                                                                                                                                                                                                                                                                                                                                                                                   |  |        |        |        |        |        |   |  |  |  |        |       |   |  |  |        |              |              |   |  |        |              |              |              |   |                                                                                                                                                                                                                                                                                                                                                                                                                   |  |        |        |        |        |        |   |  |  |  |        |              |   |  |  |        |              |              |   |  |        |              |              |              |   |
| Ca_sou  | -0.021                                                                                                                                                                                                                                                                                                                                                                                | -0.243       | -0.080        | 1           |        |        |        |   |  |  |  |        |       |   |  |  |        |       |       |   |  |        |       |       |       |   |                                                                                                                                                                                                                                                                                                                                                                                                                                 |  |        |        |        |        |        |   |  |  |  |        |              |   |  |  |        |              |              |   |  |        |              |              |              |   |                                                                                                                                                                                                                                                                                                                                                                                                                   |  |        |        |        |        |        |   |  |  |  |        |       |   |  |  |        |              |              |   |  |        |              |              |              |   |                                                                                                                                                                                                                                                                                                                                                                                                                   |  |        |        |        |        |        |   |  |  |  |        |              |   |  |  |        |              |              |   |  |        |              |              |              |   |
| pine #3 | <table> <tr><th></th><th>Ca_eas</th><th>Ca_wes</th><th>Ca_nor</th><th>Ca_sou</th></tr> <tr><th>Ca_eas</th><td>1</td><td></td><td></td><td></td></tr> <tr><th>Ca_wes</th><td>0.804</td><td>1</td><td></td><td></td></tr> <tr><th>Ca_nor</th><td>0.801</td><td>0.883</td><td>1</td><td></td></tr> <tr><th>Ca_sou</th><td>0.722</td><td>0.865</td><td>0.851</td><td>1</td></tr> </table> |              | Ca_eas        | Ca_wes      | Ca_nor | Ca_sou | Ca_eas | 1 |  |  |  | Ca_wes | 0.804 | 1 |  |  | Ca_nor | 0.801 | 0.883 | 1 |  | Ca_sou | 0.722 | 0.865 | 0.851 | 1 | <table> <tr><th></th><th>Ca_eas</th><th>Ca_wes</th><th>Ca_nor</th><th>Ca_sou</th></tr> <tr><th>Ca_eas</th><td>1</td><td></td><td></td><td></td></tr> <tr><th>Ca_wes</th><td><b>0.819</b></td><td>1</td><td></td><td></td></tr> <tr><th>Ca_nor</th><td><b>0.833</b></td><td><b>0.825</b></td><td>1</td><td></td></tr> <tr><th>Ca_sou</th><td><b>0.757</b></td><td><b>0.782</b></td><td><b>0.810</b></td><td>1</td></tr> </table> |  | Ca_eas | Ca_wes | Ca_nor | Ca_sou | Ca_eas | 1 |  |  |  | Ca_wes | <b>0.819</b> | 1 |  |  | Ca_nor | <b>0.833</b> | <b>0.825</b> | 1 |  | Ca_sou | <b>0.757</b> | <b>0.782</b> | <b>0.810</b> | 1 | <table> <tr><th></th><th>Ca_eas</th><th>Ca_wes</th><th>Ca_nor</th><th>Ca_sou</th></tr> <tr><th>Ca_eas</th><td>1</td><td></td><td></td><td></td></tr> <tr><th>Ca_wes</th><td>0.119</td><td>1</td><td></td><td></td></tr> <tr><th>Ca_nor</th><td>0.274</td><td>0.172</td><td>1</td><td></td></tr> <tr><th>Ca_sou</th><td><b>0.312</b></td><td><b>0.328</b></td><td><b>0.353</b></td><td>1</td></tr> </table>        |  | Ca_eas | Ca_wes | Ca_nor | Ca_sou | Ca_eas | 1 |  |  |  | Ca_wes | 0.119 | 1 |  |  | Ca_nor | 0.274        | 0.172        | 1 |  | Ca_sou | <b>0.312</b> | <b>0.328</b> | <b>0.353</b> | 1 | <table> <tr><th></th><th>Ca_eas</th><th>Ca_wes</th><th>Ca_nor</th><th>Ca_sou</th></tr> <tr><th>Ca_eas</th><td>1</td><td></td><td></td><td></td></tr> <tr><th>Ca_wes</th><td>0.190</td><td>1</td><td></td><td></td></tr> <tr><th>Ca_nor</th><td><b>0.380</b></td><td>0.147</td><td>1</td><td></td></tr> <tr><th>Ca_sou</th><td><b>0.354</b></td><td><b>0.330</b></td><td><b>0.287</b></td><td>1</td></tr> </table> |  | Ca_eas | Ca_wes | Ca_nor | Ca_sou | Ca_eas | 1 |  |  |  | Ca_wes | 0.190        | 1 |  |  | Ca_nor | <b>0.380</b> | 0.147        | 1 |  | Ca_sou | <b>0.354</b> | <b>0.330</b> | <b>0.287</b> | 1 |
|         | Ca_eas                                                                                                                                                                                                                                                                                                                                                                                | Ca_wes       | Ca_nor        | Ca_sou      |        |        |        |   |  |  |  |        |       |   |  |  |        |       |       |   |  |        |       |       |       |   |                                                                                                                                                                                                                                                                                                                                                                                                                                 |  |        |        |        |        |        |   |  |  |  |        |              |   |  |  |        |              |              |   |  |        |              |              |              |   |                                                                                                                                                                                                                                                                                                                                                                                                                   |  |        |        |        |        |        |   |  |  |  |        |       |   |  |  |        |              |              |   |  |        |              |              |              |   |                                                                                                                                                                                                                                                                                                                                                                                                                   |  |        |        |        |        |        |   |  |  |  |        |              |   |  |  |        |              |              |   |  |        |              |              |              |   |
| Ca_eas  | 1                                                                                                                                                                                                                                                                                                                                                                                     |              |               |             |        |        |        |   |  |  |  |        |       |   |  |  |        |       |       |   |  |        |       |       |       |   |                                                                                                                                                                                                                                                                                                                                                                                                                                 |  |        |        |        |        |        |   |  |  |  |        |              |   |  |  |        |              |              |   |  |        |              |              |              |   |                                                                                                                                                                                                                                                                                                                                                                                                                   |  |        |        |        |        |        |   |  |  |  |        |       |   |  |  |        |              |              |   |  |        |              |              |              |   |                                                                                                                                                                                                                                                                                                                                                                                                                   |  |        |        |        |        |        |   |  |  |  |        |              |   |  |  |        |              |              |   |  |        |              |              |              |   |
| Ca_wes  | 0.804                                                                                                                                                                                                                                                                                                                                                                                 | 1            |               |             |        |        |        |   |  |  |  |        |       |   |  |  |        |       |       |   |  |        |       |       |       |   |                                                                                                                                                                                                                                                                                                                                                                                                                                 |  |        |        |        |        |        |   |  |  |  |        |              |   |  |  |        |              |              |   |  |        |              |              |              |   |                                                                                                                                                                                                                                                                                                                                                                                                                   |  |        |        |        |        |        |   |  |  |  |        |       |   |  |  |        |              |              |   |  |        |              |              |              |   |                                                                                                                                                                                                                                                                                                                                                                                                                   |  |        |        |        |        |        |   |  |  |  |        |              |   |  |  |        |              |              |   |  |        |              |              |              |   |
| Ca_nor  | 0.801                                                                                                                                                                                                                                                                                                                                                                                 | 0.883        | 1             |             |        |        |        |   |  |  |  |        |       |   |  |  |        |       |       |   |  |        |       |       |       |   |                                                                                                                                                                                                                                                                                                                                                                                                                                 |  |        |        |        |        |        |   |  |  |  |        |              |   |  |  |        |              |              |   |  |        |              |              |              |   |                                                                                                                                                                                                                                                                                                                                                                                                                   |  |        |        |        |        |        |   |  |  |  |        |       |   |  |  |        |              |              |   |  |        |              |              |              |   |                                                                                                                                                                                                                                                                                                                                                                                                                   |  |        |        |        |        |        |   |  |  |  |        |              |   |  |  |        |              |              |   |  |        |              |              |              |   |
| Ca_sou  | 0.722                                                                                                                                                                                                                                                                                                                                                                                 | 0.865        | 0.851         | 1           |        |        |        |   |  |  |  |        |       |   |  |  |        |       |       |   |  |        |       |       |       |   |                                                                                                                                                                                                                                                                                                                                                                                                                                 |  |        |        |        |        |        |   |  |  |  |        |              |   |  |  |        |              |              |   |  |        |              |              |              |   |                                                                                                                                                                                                                                                                                                                                                                                                                   |  |        |        |        |        |        |   |  |  |  |        |       |   |  |  |        |              |              |   |  |        |              |              |              |   |                                                                                                                                                                                                                                                                                                                                                                                                                   |  |        |        |        |        |        |   |  |  |  |        |              |   |  |  |        |              |              |   |  |        |              |              |              |   |
|         | Ca_eas                                                                                                                                                                                                                                                                                                                                                                                | Ca_wes       | Ca_nor        | Ca_sou      |        |        |        |   |  |  |  |        |       |   |  |  |        |       |       |   |  |        |       |       |       |   |                                                                                                                                                                                                                                                                                                                                                                                                                                 |  |        |        |        |        |        |   |  |  |  |        |              |   |  |  |        |              |              |   |  |        |              |              |              |   |                                                                                                                                                                                                                                                                                                                                                                                                                   |  |        |        |        |        |        |   |  |  |  |        |       |   |  |  |        |              |              |   |  |        |              |              |              |   |                                                                                                                                                                                                                                                                                                                                                                                                                   |  |        |        |        |        |        |   |  |  |  |        |              |   |  |  |        |              |              |   |  |        |              |              |              |   |
| Ca_eas  | 1                                                                                                                                                                                                                                                                                                                                                                                     |              |               |             |        |        |        |   |  |  |  |        |       |   |  |  |        |       |       |   |  |        |       |       |       |   |                                                                                                                                                                                                                                                                                                                                                                                                                                 |  |        |        |        |        |        |   |  |  |  |        |              |   |  |  |        |              |              |   |  |        |              |              |              |   |                                                                                                                                                                                                                                                                                                                                                                                                                   |  |        |        |        |        |        |   |  |  |  |        |       |   |  |  |        |              |              |   |  |        |              |              |              |   |                                                                                                                                                                                                                                                                                                                                                                                                                   |  |        |        |        |        |        |   |  |  |  |        |              |   |  |  |        |              |              |   |  |        |              |              |              |   |
| Ca_wes  | <b>0.819</b>                                                                                                                                                                                                                                                                                                                                                                          | 1            |               |             |        |        |        |   |  |  |  |        |       |   |  |  |        |       |       |   |  |        |       |       |       |   |                                                                                                                                                                                                                                                                                                                                                                                                                                 |  |        |        |        |        |        |   |  |  |  |        |              |   |  |  |        |              |              |   |  |        |              |              |              |   |                                                                                                                                                                                                                                                                                                                                                                                                                   |  |        |        |        |        |        |   |  |  |  |        |       |   |  |  |        |              |              |   |  |        |              |              |              |   |                                                                                                                                                                                                                                                                                                                                                                                                                   |  |        |        |        |        |        |   |  |  |  |        |              |   |  |  |        |              |              |   |  |        |              |              |              |   |
| Ca_nor  | <b>0.833</b>                                                                                                                                                                                                                                                                                                                                                                          | <b>0.825</b> | 1             |             |        |        |        |   |  |  |  |        |       |   |  |  |        |       |       |   |  |        |       |       |       |   |                                                                                                                                                                                                                                                                                                                                                                                                                                 |  |        |        |        |        |        |   |  |  |  |        |              |   |  |  |        |              |              |   |  |        |              |              |              |   |                                                                                                                                                                                                                                                                                                                                                                                                                   |  |        |        |        |        |        |   |  |  |  |        |       |   |  |  |        |              |              |   |  |        |              |              |              |   |                                                                                                                                                                                                                                                                                                                                                                                                                   |  |        |        |        |        |        |   |  |  |  |        |              |   |  |  |        |              |              |   |  |        |              |              |              |   |
| Ca_sou  | <b>0.757</b>                                                                                                                                                                                                                                                                                                                                                                          | <b>0.782</b> | <b>0.810</b>  | 1           |        |        |        |   |  |  |  |        |       |   |  |  |        |       |       |   |  |        |       |       |       |   |                                                                                                                                                                                                                                                                                                                                                                                                                                 |  |        |        |        |        |        |   |  |  |  |        |              |   |  |  |        |              |              |   |  |        |              |              |              |   |                                                                                                                                                                                                                                                                                                                                                                                                                   |  |        |        |        |        |        |   |  |  |  |        |       |   |  |  |        |              |              |   |  |        |              |              |              |   |                                                                                                                                                                                                                                                                                                                                                                                                                   |  |        |        |        |        |        |   |  |  |  |        |              |   |  |  |        |              |              |   |  |        |              |              |              |   |
|         | Ca_eas                                                                                                                                                                                                                                                                                                                                                                                | Ca_wes       | Ca_nor        | Ca_sou      |        |        |        |   |  |  |  |        |       |   |  |  |        |       |       |   |  |        |       |       |       |   |                                                                                                                                                                                                                                                                                                                                                                                                                                 |  |        |        |        |        |        |   |  |  |  |        |              |   |  |  |        |              |              |   |  |        |              |              |              |   |                                                                                                                                                                                                                                                                                                                                                                                                                   |  |        |        |        |        |        |   |  |  |  |        |       |   |  |  |        |              |              |   |  |        |              |              |              |   |                                                                                                                                                                                                                                                                                                                                                                                                                   |  |        |        |        |        |        |   |  |  |  |        |              |   |  |  |        |              |              |   |  |        |              |              |              |   |
| Ca_eas  | 1                                                                                                                                                                                                                                                                                                                                                                                     |              |               |             |        |        |        |   |  |  |  |        |       |   |  |  |        |       |       |   |  |        |       |       |       |   |                                                                                                                                                                                                                                                                                                                                                                                                                                 |  |        |        |        |        |        |   |  |  |  |        |              |   |  |  |        |              |              |   |  |        |              |              |              |   |                                                                                                                                                                                                                                                                                                                                                                                                                   |  |        |        |        |        |        |   |  |  |  |        |       |   |  |  |        |              |              |   |  |        |              |              |              |   |                                                                                                                                                                                                                                                                                                                                                                                                                   |  |        |        |        |        |        |   |  |  |  |        |              |   |  |  |        |              |              |   |  |        |              |              |              |   |
| Ca_wes  | 0.119                                                                                                                                                                                                                                                                                                                                                                                 | 1            |               |             |        |        |        |   |  |  |  |        |       |   |  |  |        |       |       |   |  |        |       |       |       |   |                                                                                                                                                                                                                                                                                                                                                                                                                                 |  |        |        |        |        |        |   |  |  |  |        |              |   |  |  |        |              |              |   |  |        |              |              |              |   |                                                                                                                                                                                                                                                                                                                                                                                                                   |  |        |        |        |        |        |   |  |  |  |        |       |   |  |  |        |              |              |   |  |        |              |              |              |   |                                                                                                                                                                                                                                                                                                                                                                                                                   |  |        |        |        |        |        |   |  |  |  |        |              |   |  |  |        |              |              |   |  |        |              |              |              |   |
| Ca_nor  | 0.274                                                                                                                                                                                                                                                                                                                                                                                 | 0.172        | 1             |             |        |        |        |   |  |  |  |        |       |   |  |  |        |       |       |   |  |        |       |       |       |   |                                                                                                                                                                                                                                                                                                                                                                                                                                 |  |        |        |        |        |        |   |  |  |  |        |              |   |  |  |        |              |              |   |  |        |              |              |              |   |                                                                                                                                                                                                                                                                                                                                                                                                                   |  |        |        |        |        |        |   |  |  |  |        |       |   |  |  |        |              |              |   |  |        |              |              |              |   |                                                                                                                                                                                                                                                                                                                                                                                                                   |  |        |        |        |        |        |   |  |  |  |        |              |   |  |  |        |              |              |   |  |        |              |              |              |   |
| Ca_sou  | <b>0.312</b>                                                                                                                                                                                                                                                                                                                                                                          | <b>0.328</b> | <b>0.353</b>  | 1           |        |        |        |   |  |  |  |        |       |   |  |  |        |       |       |   |  |        |       |       |       |   |                                                                                                                                                                                                                                                                                                                                                                                                                                 |  |        |        |        |        |        |   |  |  |  |        |              |   |  |  |        |              |              |   |  |        |              |              |              |   |                                                                                                                                                                                                                                                                                                                                                                                                                   |  |        |        |        |        |        |   |  |  |  |        |       |   |  |  |        |              |              |   |  |        |              |              |              |   |                                                                                                                                                                                                                                                                                                                                                                                                                   |  |        |        |        |        |        |   |  |  |  |        |              |   |  |  |        |              |              |   |  |        |              |              |              |   |
|         | Ca_eas                                                                                                                                                                                                                                                                                                                                                                                | Ca_wes       | Ca_nor        | Ca_sou      |        |        |        |   |  |  |  |        |       |   |  |  |        |       |       |   |  |        |       |       |       |   |                                                                                                                                                                                                                                                                                                                                                                                                                                 |  |        |        |        |        |        |   |  |  |  |        |              |   |  |  |        |              |              |   |  |        |              |              |              |   |                                                                                                                                                                                                                                                                                                                                                                                                                   |  |        |        |        |        |        |   |  |  |  |        |       |   |  |  |        |              |              |   |  |        |              |              |              |   |                                                                                                                                                                                                                                                                                                                                                                                                                   |  |        |        |        |        |        |   |  |  |  |        |              |   |  |  |        |              |              |   |  |        |              |              |              |   |
| Ca_eas  | 1                                                                                                                                                                                                                                                                                                                                                                                     |              |               |             |        |        |        |   |  |  |  |        |       |   |  |  |        |       |       |   |  |        |       |       |       |   |                                                                                                                                                                                                                                                                                                                                                                                                                                 |  |        |        |        |        |        |   |  |  |  |        |              |   |  |  |        |              |              |   |  |        |              |              |              |   |                                                                                                                                                                                                                                                                                                                                                                                                                   |  |        |        |        |        |        |   |  |  |  |        |       |   |  |  |        |              |              |   |  |        |              |              |              |   |                                                                                                                                                                                                                                                                                                                                                                                                                   |  |        |        |        |        |        |   |  |  |  |        |              |   |  |  |        |              |              |   |  |        |              |              |              |   |
| Ca_wes  | 0.190                                                                                                                                                                                                                                                                                                                                                                                 | 1            |               |             |        |        |        |   |  |  |  |        |       |   |  |  |        |       |       |   |  |        |       |       |       |   |                                                                                                                                                                                                                                                                                                                                                                                                                                 |  |        |        |        |        |        |   |  |  |  |        |              |   |  |  |        |              |              |   |  |        |              |              |              |   |                                                                                                                                                                                                                                                                                                                                                                                                                   |  |        |        |        |        |        |   |  |  |  |        |       |   |  |  |        |              |              |   |  |        |              |              |              |   |                                                                                                                                                                                                                                                                                                                                                                                                                   |  |        |        |        |        |        |   |  |  |  |        |              |   |  |  |        |              |              |   |  |        |              |              |              |   |
| Ca_nor  | <b>0.380</b>                                                                                                                                                                                                                                                                                                                                                                          | 0.147        | 1             |             |        |        |        |   |  |  |  |        |       |   |  |  |        |       |       |   |  |        |       |       |       |   |                                                                                                                                                                                                                                                                                                                                                                                                                                 |  |        |        |        |        |        |   |  |  |  |        |              |   |  |  |        |              |              |   |  |        |              |              |              |   |                                                                                                                                                                                                                                                                                                                                                                                                                   |  |        |        |        |        |        |   |  |  |  |        |       |   |  |  |        |              |              |   |  |        |              |              |              |   |                                                                                                                                                                                                                                                                                                                                                                                                                   |  |        |        |        |        |        |   |  |  |  |        |              |   |  |  |        |              |              |   |  |        |              |              |              |   |
| Ca_sou  | <b>0.354</b>                                                                                                                                                                                                                                                                                                                                                                          | <b>0.330</b> | <b>0.287</b>  | 1           |        |        |        |   |  |  |  |        |       |   |  |  |        |       |       |   |  |        |       |       |       |   |                                                                                                                                                                                                                                                                                                                                                                                                                                 |  |        |        |        |        |        |   |  |  |  |        |              |   |  |  |        |              |              |   |  |        |              |              |              |   |                                                                                                                                                                                                                                                                                                                                                                                                                   |  |        |        |        |        |        |   |  |  |  |        |       |   |  |  |        |              |              |   |  |        |              |              |              |   |                                                                                                                                                                                                                                                                                                                                                                                                                   |  |        |        |        |        |        |   |  |  |  |        |              |   |  |  |        |              |              |   |  |        |              |              |              |   |
| pine #4 | <table> <tr><th></th><th>Ca_eas</th><th>Ca_wes</th><th>Ca_nor</th><th>Ca_sou</th></tr> <tr><th>Ca_eas</th><td>1</td><td></td><td></td><td></td></tr> <tr><th>Ca_wes</th><td>0.774</td><td>1</td><td></td><td></td></tr> <tr><th>Ca_nor</th><td>0.914</td><td>0.761</td><td>1</td><td></td></tr> <tr><th>Ca_sou</th><td>0.931</td><td>0.770</td><td>0.950</td><td>1</td></tr> </table> |              | Ca_eas        | Ca_wes      | Ca_nor | Ca_sou | Ca_eas | 1 |  |  |  | Ca_wes | 0.774 | 1 |  |  | Ca_nor | 0.914 | 0.761 | 1 |  | Ca_sou | 0.931 | 0.770 | 0.950 | 1 | <table> <tr><th></th><th>Ca_eas</th><th>Ca_wes</th><th>Ca_nor</th><th>Ca_sou</th></tr> <tr><th>Ca_eas</th><td>1</td><td></td><td></td><td></td></tr> <tr><th>Ca_wes</th><td>0.022</td><td>1</td><td></td><td></td></tr> <tr><th>Ca_nor</th><td>0.101</td><td>0.040</td><td>1</td><td></td></tr> <tr><th>Ca_sou</th><td>0.077</td><td>0.102</td><td><b>0.416</b></td><td>1</td></tr> </table>                                    |  | Ca_eas | Ca_wes | Ca_nor | Ca_sou | Ca_eas | 1 |  |  |  | Ca_wes | 0.022        | 1 |  |  | Ca_nor | 0.101        | 0.040        | 1 |  | Ca_sou | 0.077        | 0.102        | <b>0.416</b> | 1 | <table> <tr><th></th><th>Ca_eas</th><th>Ca_wes</th><th>Ca_nor</th><th>Ca_sou</th></tr> <tr><th>Ca_eas</th><td>1</td><td></td><td></td><td></td></tr> <tr><th>Ca_wes</th><td>0.092</td><td>1</td><td></td><td></td></tr> <tr><th>Ca_nor</th><td><b>0.230</b></td><td>0.086</td><td>1</td><td></td></tr> <tr><th>Ca_sou</th><td><b>0.326</b></td><td>0.034</td><td><b>0.353</b></td><td>1</td></tr> </table>        |  | Ca_eas | Ca_wes | Ca_nor | Ca_sou | Ca_eas | 1 |  |  |  | Ca_wes | 0.092 | 1 |  |  | Ca_nor | <b>0.230</b> | 0.086        | 1 |  | Ca_sou | <b>0.326</b> | 0.034        | <b>0.353</b> | 1 | <table> <tr><th></th><th>Ca_eas</th><th>Ca_wes</th><th>Ca_nor</th><th>Ca_sou</th></tr> <tr><th>Ca_eas</th><td>1</td><td></td><td></td><td></td></tr> <tr><th>Ca_wes</th><td>0.085</td><td>1</td><td></td><td></td></tr> <tr><th>Ca_nor</th><td>0.218</td><td>0.050</td><td>1</td><td></td></tr> <tr><th>Ca_sou</th><td><b>0.374</b></td><td>-0.007</td><td><b>0.330</b></td><td>1</td></tr> </table>              |  | Ca_eas | Ca_wes | Ca_nor | Ca_sou | Ca_eas | 1 |  |  |  | Ca_wes | 0.085        | 1 |  |  | Ca_nor | 0.218        | 0.050        | 1 |  | Ca_sou | <b>0.374</b> | -0.007       | <b>0.330</b> | 1 |
|         | Ca_eas                                                                                                                                                                                                                                                                                                                                                                                | Ca_wes       | Ca_nor        | Ca_sou      |        |        |        |   |  |  |  |        |       |   |  |  |        |       |       |   |  |        |       |       |       |   |                                                                                                                                                                                                                                                                                                                                                                                                                                 |  |        |        |        |        |        |   |  |  |  |        |              |   |  |  |        |              |              |   |  |        |              |              |              |   |                                                                                                                                                                                                                                                                                                                                                                                                                   |  |        |        |        |        |        |   |  |  |  |        |       |   |  |  |        |              |              |   |  |        |              |              |              |   |                                                                                                                                                                                                                                                                                                                                                                                                                   |  |        |        |        |        |        |   |  |  |  |        |              |   |  |  |        |              |              |   |  |        |              |              |              |   |
| Ca_eas  | 1                                                                                                                                                                                                                                                                                                                                                                                     |              |               |             |        |        |        |   |  |  |  |        |       |   |  |  |        |       |       |   |  |        |       |       |       |   |                                                                                                                                                                                                                                                                                                                                                                                                                                 |  |        |        |        |        |        |   |  |  |  |        |              |   |  |  |        |              |              |   |  |        |              |              |              |   |                                                                                                                                                                                                                                                                                                                                                                                                                   |  |        |        |        |        |        |   |  |  |  |        |       |   |  |  |        |              |              |   |  |        |              |              |              |   |                                                                                                                                                                                                                                                                                                                                                                                                                   |  |        |        |        |        |        |   |  |  |  |        |              |   |  |  |        |              |              |   |  |        |              |              |              |   |
| Ca_wes  | 0.774                                                                                                                                                                                                                                                                                                                                                                                 | 1            |               |             |        |        |        |   |  |  |  |        |       |   |  |  |        |       |       |   |  |        |       |       |       |   |                                                                                                                                                                                                                                                                                                                                                                                                                                 |  |        |        |        |        |        |   |  |  |  |        |              |   |  |  |        |              |              |   |  |        |              |              |              |   |                                                                                                                                                                                                                                                                                                                                                                                                                   |  |        |        |        |        |        |   |  |  |  |        |       |   |  |  |        |              |              |   |  |        |              |              |              |   |                                                                                                                                                                                                                                                                                                                                                                                                                   |  |        |        |        |        |        |   |  |  |  |        |              |   |  |  |        |              |              |   |  |        |              |              |              |   |
| Ca_nor  | 0.914                                                                                                                                                                                                                                                                                                                                                                                 | 0.761        | 1             |             |        |        |        |   |  |  |  |        |       |   |  |  |        |       |       |   |  |        |       |       |       |   |                                                                                                                                                                                                                                                                                                                                                                                                                                 |  |        |        |        |        |        |   |  |  |  |        |              |   |  |  |        |              |              |   |  |        |              |              |              |   |                                                                                                                                                                                                                                                                                                                                                                                                                   |  |        |        |        |        |        |   |  |  |  |        |       |   |  |  |        |              |              |   |  |        |              |              |              |   |                                                                                                                                                                                                                                                                                                                                                                                                                   |  |        |        |        |        |        |   |  |  |  |        |              |   |  |  |        |              |              |   |  |        |              |              |              |   |
| Ca_sou  | 0.931                                                                                                                                                                                                                                                                                                                                                                                 | 0.770        | 0.950         | 1           |        |        |        |   |  |  |  |        |       |   |  |  |        |       |       |   |  |        |       |       |       |   |                                                                                                                                                                                                                                                                                                                                                                                                                                 |  |        |        |        |        |        |   |  |  |  |        |              |   |  |  |        |              |              |   |  |        |              |              |              |   |                                                                                                                                                                                                                                                                                                                                                                                                                   |  |        |        |        |        |        |   |  |  |  |        |       |   |  |  |        |              |              |   |  |        |              |              |              |   |                                                                                                                                                                                                                                                                                                                                                                                                                   |  |        |        |        |        |        |   |  |  |  |        |              |   |  |  |        |              |              |   |  |        |              |              |              |   |
|         | Ca_eas                                                                                                                                                                                                                                                                                                                                                                                | Ca_wes       | Ca_nor        | Ca_sou      |        |        |        |   |  |  |  |        |       |   |  |  |        |       |       |   |  |        |       |       |       |   |                                                                                                                                                                                                                                                                                                                                                                                                                                 |  |        |        |        |        |        |   |  |  |  |        |              |   |  |  |        |              |              |   |  |        |              |              |              |   |                                                                                                                                                                                                                                                                                                                                                                                                                   |  |        |        |        |        |        |   |  |  |  |        |       |   |  |  |        |              |              |   |  |        |              |              |              |   |                                                                                                                                                                                                                                                                                                                                                                                                                   |  |        |        |        |        |        |   |  |  |  |        |              |   |  |  |        |              |              |   |  |        |              |              |              |   |
| Ca_eas  | 1                                                                                                                                                                                                                                                                                                                                                                                     |              |               |             |        |        |        |   |  |  |  |        |       |   |  |  |        |       |       |   |  |        |       |       |       |   |                                                                                                                                                                                                                                                                                                                                                                                                                                 |  |        |        |        |        |        |   |  |  |  |        |              |   |  |  |        |              |              |   |  |        |              |              |              |   |                                                                                                                                                                                                                                                                                                                                                                                                                   |  |        |        |        |        |        |   |  |  |  |        |       |   |  |  |        |              |              |   |  |        |              |              |              |   |                                                                                                                                                                                                                                                                                                                                                                                                                   |  |        |        |        |        |        |   |  |  |  |        |              |   |  |  |        |              |              |   |  |        |              |              |              |   |
| Ca_wes  | 0.022                                                                                                                                                                                                                                                                                                                                                                                 | 1            |               |             |        |        |        |   |  |  |  |        |       |   |  |  |        |       |       |   |  |        |       |       |       |   |                                                                                                                                                                                                                                                                                                                                                                                                                                 |  |        |        |        |        |        |   |  |  |  |        |              |   |  |  |        |              |              |   |  |        |              |              |              |   |                                                                                                                                                                                                                                                                                                                                                                                                                   |  |        |        |        |        |        |   |  |  |  |        |       |   |  |  |        |              |              |   |  |        |              |              |              |   |                                                                                                                                                                                                                                                                                                                                                                                                                   |  |        |        |        |        |        |   |  |  |  |        |              |   |  |  |        |              |              |   |  |        |              |              |              |   |
| Ca_nor  | 0.101                                                                                                                                                                                                                                                                                                                                                                                 | 0.040        | 1             |             |        |        |        |   |  |  |  |        |       |   |  |  |        |       |       |   |  |        |       |       |       |   |                                                                                                                                                                                                                                                                                                                                                                                                                                 |  |        |        |        |        |        |   |  |  |  |        |              |   |  |  |        |              |              |   |  |        |              |              |              |   |                                                                                                                                                                                                                                                                                                                                                                                                                   |  |        |        |        |        |        |   |  |  |  |        |       |   |  |  |        |              |              |   |  |        |              |              |              |   |                                                                                                                                                                                                                                                                                                                                                                                                                   |  |        |        |        |        |        |   |  |  |  |        |              |   |  |  |        |              |              |   |  |        |              |              |              |   |
| Ca_sou  | 0.077                                                                                                                                                                                                                                                                                                                                                                                 | 0.102        | <b>0.416</b>  | 1           |        |        |        |   |  |  |  |        |       |   |  |  |        |       |       |   |  |        |       |       |       |   |                                                                                                                                                                                                                                                                                                                                                                                                                                 |  |        |        |        |        |        |   |  |  |  |        |              |   |  |  |        |              |              |   |  |        |              |              |              |   |                                                                                                                                                                                                                                                                                                                                                                                                                   |  |        |        |        |        |        |   |  |  |  |        |       |   |  |  |        |              |              |   |  |        |              |              |              |   |                                                                                                                                                                                                                                                                                                                                                                                                                   |  |        |        |        |        |        |   |  |  |  |        |              |   |  |  |        |              |              |   |  |        |              |              |              |   |
|         | Ca_eas                                                                                                                                                                                                                                                                                                                                                                                | Ca_wes       | Ca_nor        | Ca_sou      |        |        |        |   |  |  |  |        |       |   |  |  |        |       |       |   |  |        |       |       |       |   |                                                                                                                                                                                                                                                                                                                                                                                                                                 |  |        |        |        |        |        |   |  |  |  |        |              |   |  |  |        |              |              |   |  |        |              |              |              |   |                                                                                                                                                                                                                                                                                                                                                                                                                   |  |        |        |        |        |        |   |  |  |  |        |       |   |  |  |        |              |              |   |  |        |              |              |              |   |                                                                                                                                                                                                                                                                                                                                                                                                                   |  |        |        |        |        |        |   |  |  |  |        |              |   |  |  |        |              |              |   |  |        |              |              |              |   |
| Ca_eas  | 1                                                                                                                                                                                                                                                                                                                                                                                     |              |               |             |        |        |        |   |  |  |  |        |       |   |  |  |        |       |       |   |  |        |       |       |       |   |                                                                                                                                                                                                                                                                                                                                                                                                                                 |  |        |        |        |        |        |   |  |  |  |        |              |   |  |  |        |              |              |   |  |        |              |              |              |   |                                                                                                                                                                                                                                                                                                                                                                                                                   |  |        |        |        |        |        |   |  |  |  |        |       |   |  |  |        |              |              |   |  |        |              |              |              |   |                                                                                                                                                                                                                                                                                                                                                                                                                   |  |        |        |        |        |        |   |  |  |  |        |              |   |  |  |        |              |              |   |  |        |              |              |              |   |
| Ca_wes  | 0.092                                                                                                                                                                                                                                                                                                                                                                                 | 1            |               |             |        |        |        |   |  |  |  |        |       |   |  |  |        |       |       |   |  |        |       |       |       |   |                                                                                                                                                                                                                                                                                                                                                                                                                                 |  |        |        |        |        |        |   |  |  |  |        |              |   |  |  |        |              |              |   |  |        |              |              |              |   |                                                                                                                                                                                                                                                                                                                                                                                                                   |  |        |        |        |        |        |   |  |  |  |        |       |   |  |  |        |              |              |   |  |        |              |              |              |   |                                                                                                                                                                                                                                                                                                                                                                                                                   |  |        |        |        |        |        |   |  |  |  |        |              |   |  |  |        |              |              |   |  |        |              |              |              |   |
| Ca_nor  | <b>0.230</b>                                                                                                                                                                                                                                                                                                                                                                          | 0.086        | 1             |             |        |        |        |   |  |  |  |        |       |   |  |  |        |       |       |   |  |        |       |       |       |   |                                                                                                                                                                                                                                                                                                                                                                                                                                 |  |        |        |        |        |        |   |  |  |  |        |              |   |  |  |        |              |              |   |  |        |              |              |              |   |                                                                                                                                                                                                                                                                                                                                                                                                                   |  |        |        |        |        |        |   |  |  |  |        |       |   |  |  |        |              |              |   |  |        |              |              |              |   |                                                                                                                                                                                                                                                                                                                                                                                                                   |  |        |        |        |        |        |   |  |  |  |        |              |   |  |  |        |              |              |   |  |        |              |              |              |   |
| Ca_sou  | <b>0.326</b>                                                                                                                                                                                                                                                                                                                                                                          | 0.034        | <b>0.353</b>  | 1           |        |        |        |   |  |  |  |        |       |   |  |  |        |       |       |   |  |        |       |       |       |   |                                                                                                                                                                                                                                                                                                                                                                                                                                 |  |        |        |        |        |        |   |  |  |  |        |              |   |  |  |        |              |              |   |  |        |              |              |              |   |                                                                                                                                                                                                                                                                                                                                                                                                                   |  |        |        |        |        |        |   |  |  |  |        |       |   |  |  |        |              |              |   |  |        |              |              |              |   |                                                                                                                                                                                                                                                                                                                                                                                                                   |  |        |        |        |        |        |   |  |  |  |        |              |   |  |  |        |              |              |   |  |        |              |              |              |   |
|         | Ca_eas                                                                                                                                                                                                                                                                                                                                                                                | Ca_wes       | Ca_nor        | Ca_sou      |        |        |        |   |  |  |  |        |       |   |  |  |        |       |       |   |  |        |       |       |       |   |                                                                                                                                                                                                                                                                                                                                                                                                                                 |  |        |        |        |        |        |   |  |  |  |        |              |   |  |  |        |              |              |   |  |        |              |              |              |   |                                                                                                                                                                                                                                                                                                                                                                                                                   |  |        |        |        |        |        |   |  |  |  |        |       |   |  |  |        |              |              |   |  |        |              |              |              |   |                                                                                                                                                                                                                                                                                                                                                                                                                   |  |        |        |        |        |        |   |  |  |  |        |              |   |  |  |        |              |              |   |  |        |              |              |              |   |
| Ca_eas  | 1                                                                                                                                                                                                                                                                                                                                                                                     |              |               |             |        |        |        |   |  |  |  |        |       |   |  |  |        |       |       |   |  |        |       |       |       |   |                                                                                                                                                                                                                                                                                                                                                                                                                                 |  |        |        |        |        |        |   |  |  |  |        |              |   |  |  |        |              |              |   |  |        |              |              |              |   |                                                                                                                                                                                                                                                                                                                                                                                                                   |  |        |        |        |        |        |   |  |  |  |        |       |   |  |  |        |              |              |   |  |        |              |              |              |   |                                                                                                                                                                                                                                                                                                                                                                                                                   |  |        |        |        |        |        |   |  |  |  |        |              |   |  |  |        |              |              |   |  |        |              |              |              |   |
| Ca_wes  | 0.085                                                                                                                                                                                                                                                                                                                                                                                 | 1            |               |             |        |        |        |   |  |  |  |        |       |   |  |  |        |       |       |   |  |        |       |       |       |   |                                                                                                                                                                                                                                                                                                                                                                                                                                 |  |        |        |        |        |        |   |  |  |  |        |              |   |  |  |        |              |              |   |  |        |              |              |              |   |                                                                                                                                                                                                                                                                                                                                                                                                                   |  |        |        |        |        |        |   |  |  |  |        |       |   |  |  |        |              |              |   |  |        |              |              |              |   |                                                                                                                                                                                                                                                                                                                                                                                                                   |  |        |        |        |        |        |   |  |  |  |        |              |   |  |  |        |              |              |   |  |        |              |              |              |   |
| Ca_nor  | 0.218                                                                                                                                                                                                                                                                                                                                                                                 | 0.050        | 1             |             |        |        |        |   |  |  |  |        |       |   |  |  |        |       |       |   |  |        |       |       |       |   |                                                                                                                                                                                                                                                                                                                                                                                                                                 |  |        |        |        |        |        |   |  |  |  |        |              |   |  |  |        |              |              |   |  |        |              |              |              |   |                                                                                                                                                                                                                                                                                                                                                                                                                   |  |        |        |        |        |        |   |  |  |  |        |       |   |  |  |        |              |              |   |  |        |              |              |              |   |                                                                                                                                                                                                                                                                                                                                                                                                                   |  |        |        |        |        |        |   |  |  |  |        |              |   |  |  |        |              |              |   |  |        |              |              |              |   |
| Ca_sou  | <b>0.374</b>                                                                                                                                                                                                                                                                                                                                                                          | -0.007       | <b>0.330</b>  | 1           |        |        |        |   |  |  |  |        |       |   |  |  |        |       |       |   |  |        |       |       |       |   |                                                                                                                                                                                                                                                                                                                                                                                                                                 |  |        |        |        |        |        |   |  |  |  |        |              |   |  |  |        |              |              |   |  |        |              |              |              |   |                                                                                                                                                                                                                                                                                                                                                                                                                   |  |        |        |        |        |        |   |  |  |  |        |       |   |  |  |        |              |              |   |  |        |              |              |              |   |                                                                                                                                                                                                                                                                                                                                                                                                                   |  |        |        |        |        |        |   |  |  |  |        |              |   |  |  |        |              |              |   |  |        |              |              |              |   |
| pine #5 | <table> <tr><th></th><th>Ca_eas</th><th>Ca_wes</th><th>Ca_nor</th><th>Ca_sou</th></tr> <tr><th>Ca_eas</th><td>1</td><td></td><td></td><td></td></tr> <tr><th>Ca_wes</th><td>0.847</td><td>1</td><td></td><td></td></tr> <tr><th>Ca_nor</th><td>0.849</td><td>0.735</td><td>1</td><td></td></tr> <tr><th>Ca_sou</th><td>0.919</td><td>0.859</td><td>0.809</td><td>1</td></tr> </table> |              | Ca_eas        | Ca_wes      | Ca_nor | Ca_sou | Ca_eas | 1 |  |  |  | Ca_wes | 0.847 | 1 |  |  | Ca_nor | 0.849 | 0.735 | 1 |  | Ca_sou | 0.919 | 0.859 | 0.809 | 1 | <table> <tr><th></th><th>Ca_eas</th><th>Ca_wes</th><th>Ca_nor</th><th>Ca_sou</th></tr> <tr><th>Ca_eas</th><td>1</td><td></td><td></td><td></td></tr> <tr><th>Ca_wes</th><td><b>0.239</b></td><td>1</td><td></td><td></td></tr> <tr><th>Ca_nor</th><td><b>0.432</b></td><td>0.022</td><td>1</td><td></td></tr> <tr><th>Ca_sou</th><td><b>0.419</b></td><td><b>0.352</b></td><td>0.170</td><td>1</td></tr> </table>               |  | Ca_eas | Ca_wes | Ca_nor | Ca_sou | Ca_eas | 1 |  |  |  | Ca_wes | <b>0.239</b> | 1 |  |  | Ca_nor | <b>0.432</b> | 0.022        | 1 |  | Ca_sou | <b>0.419</b> | <b>0.352</b> | 0.170        | 1 | <table> <tr><th></th><th>Ca_eas</th><th>Ca_wes</th><th>Ca_nor</th><th>Ca_sou</th></tr> <tr><th>Ca_eas</th><td>1</td><td></td><td></td><td></td></tr> <tr><th>Ca_wes</th><td>0.043</td><td>1</td><td></td><td></td></tr> <tr><th>Ca_nor</th><td><b>0.247</b></td><td>0.128</td><td>1</td><td></td></tr> <tr><th>Ca_sou</th><td>0.146</td><td>0.094</td><td>0.108</td><td>1</td></tr> </table>                      |  | Ca_eas | Ca_wes | Ca_nor | Ca_sou | Ca_eas | 1 |  |  |  | Ca_wes | 0.043 | 1 |  |  | Ca_nor | <b>0.247</b> | 0.128        | 1 |  | Ca_sou | 0.146        | 0.094        | 0.108        | 1 | <table> <tr><th></th><th>Ca_eas</th><th>Ca_wes</th><th>Ca_nor</th><th>Ca_sou</th></tr> <tr><th>Ca_eas</th><td>1</td><td></td><td></td><td></td></tr> <tr><th>Ca_wes</th><td>0.038</td><td>1</td><td></td><td></td></tr> <tr><th>Ca_nor</th><td><b>0.314</b></td><td><b>0.229</b></td><td>1</td><td></td></tr> <tr><th>Ca_sou</th><td>0.107</td><td>0.107</td><td>0.081</td><td>1</td></tr> </table>               |  | Ca_eas | Ca_wes | Ca_nor | Ca_sou | Ca_eas | 1 |  |  |  | Ca_wes | 0.038        | 1 |  |  | Ca_nor | <b>0.314</b> | <b>0.229</b> | 1 |  | Ca_sou | 0.107        | 0.107        | 0.081        | 1 |
|         | Ca_eas                                                                                                                                                                                                                                                                                                                                                                                | Ca_wes       | Ca_nor        | Ca_sou      |        |        |        |   |  |  |  |        |       |   |  |  |        |       |       |   |  |        |       |       |       |   |                                                                                                                                                                                                                                                                                                                                                                                                                                 |  |        |        |        |        |        |   |  |  |  |        |              |   |  |  |        |              |              |   |  |        |              |              |              |   |                                                                                                                                                                                                                                                                                                                                                                                                                   |  |        |        |        |        |        |   |  |  |  |        |       |   |  |  |        |              |              |   |  |        |              |              |              |   |                                                                                                                                                                                                                                                                                                                                                                                                                   |  |        |        |        |        |        |   |  |  |  |        |              |   |  |  |        |              |              |   |  |        |              |              |              |   |
| Ca_eas  | 1                                                                                                                                                                                                                                                                                                                                                                                     |              |               |             |        |        |        |   |  |  |  |        |       |   |  |  |        |       |       |   |  |        |       |       |       |   |                                                                                                                                                                                                                                                                                                                                                                                                                                 |  |        |        |        |        |        |   |  |  |  |        |              |   |  |  |        |              |              |   |  |        |              |              |              |   |                                                                                                                                                                                                                                                                                                                                                                                                                   |  |        |        |        |        |        |   |  |  |  |        |       |   |  |  |        |              |              |   |  |        |              |              |              |   |                                                                                                                                                                                                                                                                                                                                                                                                                   |  |        |        |        |        |        |   |  |  |  |        |              |   |  |  |        |              |              |   |  |        |              |              |              |   |
| Ca_wes  | 0.847                                                                                                                                                                                                                                                                                                                                                                                 | 1            |               |             |        |        |        |   |  |  |  |        |       |   |  |  |        |       |       |   |  |        |       |       |       |   |                                                                                                                                                                                                                                                                                                                                                                                                                                 |  |        |        |        |        |        |   |  |  |  |        |              |   |  |  |        |              |              |   |  |        |              |              |              |   |                                                                                                                                                                                                                                                                                                                                                                                                                   |  |        |        |        |        |        |   |  |  |  |        |       |   |  |  |        |              |              |   |  |        |              |              |              |   |                                                                                                                                                                                                                                                                                                                                                                                                                   |  |        |        |        |        |        |   |  |  |  |        |              |   |  |  |        |              |              |   |  |        |              |              |              |   |
| Ca_nor  | 0.849                                                                                                                                                                                                                                                                                                                                                                                 | 0.735        | 1             |             |        |        |        |   |  |  |  |        |       |   |  |  |        |       |       |   |  |        |       |       |       |   |                                                                                                                                                                                                                                                                                                                                                                                                                                 |  |        |        |        |        |        |   |  |  |  |        |              |   |  |  |        |              |              |   |  |        |              |              |              |   |                                                                                                                                                                                                                                                                                                                                                                                                                   |  |        |        |        |        |        |   |  |  |  |        |       |   |  |  |        |              |              |   |  |        |              |              |              |   |                                                                                                                                                                                                                                                                                                                                                                                                                   |  |        |        |        |        |        |   |  |  |  |        |              |   |  |  |        |              |              |   |  |        |              |              |              |   |
| Ca_sou  | 0.919                                                                                                                                                                                                                                                                                                                                                                                 | 0.859        | 0.809         | 1           |        |        |        |   |  |  |  |        |       |   |  |  |        |       |       |   |  |        |       |       |       |   |                                                                                                                                                                                                                                                                                                                                                                                                                                 |  |        |        |        |        |        |   |  |  |  |        |              |   |  |  |        |              |              |   |  |        |              |              |              |   |                                                                                                                                                                                                                                                                                                                                                                                                                   |  |        |        |        |        |        |   |  |  |  |        |       |   |  |  |        |              |              |   |  |        |              |              |              |   |                                                                                                                                                                                                                                                                                                                                                                                                                   |  |        |        |        |        |        |   |  |  |  |        |              |   |  |  |        |              |              |   |  |        |              |              |              |   |
|         | Ca_eas                                                                                                                                                                                                                                                                                                                                                                                | Ca_wes       | Ca_nor        | Ca_sou      |        |        |        |   |  |  |  |        |       |   |  |  |        |       |       |   |  |        |       |       |       |   |                                                                                                                                                                                                                                                                                                                                                                                                                                 |  |        |        |        |        |        |   |  |  |  |        |              |   |  |  |        |              |              |   |  |        |              |              |              |   |                                                                                                                                                                                                                                                                                                                                                                                                                   |  |        |        |        |        |        |   |  |  |  |        |       |   |  |  |        |              |              |   |  |        |              |              |              |   |                                                                                                                                                                                                                                                                                                                                                                                                                   |  |        |        |        |        |        |   |  |  |  |        |              |   |  |  |        |              |              |   |  |        |              |              |              |   |
| Ca_eas  | 1                                                                                                                                                                                                                                                                                                                                                                                     |              |               |             |        |        |        |   |  |  |  |        |       |   |  |  |        |       |       |   |  |        |       |       |       |   |                                                                                                                                                                                                                                                                                                                                                                                                                                 |  |        |        |        |        |        |   |  |  |  |        |              |   |  |  |        |              |              |   |  |        |              |              |              |   |                                                                                                                                                                                                                                                                                                                                                                                                                   |  |        |        |        |        |        |   |  |  |  |        |       |   |  |  |        |              |              |   |  |        |              |              |              |   |                                                                                                                                                                                                                                                                                                                                                                                                                   |  |        |        |        |        |        |   |  |  |  |        |              |   |  |  |        |              |              |   |  |        |              |              |              |   |
| Ca_wes  | <b>0.239</b>                                                                                                                                                                                                                                                                                                                                                                          | 1            |               |             |        |        |        |   |  |  |  |        |       |   |  |  |        |       |       |   |  |        |       |       |       |   |                                                                                                                                                                                                                                                                                                                                                                                                                                 |  |        |        |        |        |        |   |  |  |  |        |              |   |  |  |        |              |              |   |  |        |              |              |              |   |                                                                                                                                                                                                                                                                                                                                                                                                                   |  |        |        |        |        |        |   |  |  |  |        |       |   |  |  |        |              |              |   |  |        |              |              |              |   |                                                                                                                                                                                                                                                                                                                                                                                                                   |  |        |        |        |        |        |   |  |  |  |        |              |   |  |  |        |              |              |   |  |        |              |              |              |   |
| Ca_nor  | <b>0.432</b>                                                                                                                                                                                                                                                                                                                                                                          | 0.022        | 1             |             |        |        |        |   |  |  |  |        |       |   |  |  |        |       |       |   |  |        |       |       |       |   |                                                                                                                                                                                                                                                                                                                                                                                                                                 |  |        |        |        |        |        |   |  |  |  |        |              |   |  |  |        |              |              |   |  |        |              |              |              |   |                                                                                                                                                                                                                                                                                                                                                                                                                   |  |        |        |        |        |        |   |  |  |  |        |       |   |  |  |        |              |              |   |  |        |              |              |              |   |                                                                                                                                                                                                                                                                                                                                                                                                                   |  |        |        |        |        |        |   |  |  |  |        |              |   |  |  |        |              |              |   |  |        |              |              |              |   |
| Ca_sou  | <b>0.419</b>                                                                                                                                                                                                                                                                                                                                                                          | <b>0.352</b> | 0.170         | 1           |        |        |        |   |  |  |  |        |       |   |  |  |        |       |       |   |  |        |       |       |       |   |                                                                                                                                                                                                                                                                                                                                                                                                                                 |  |        |        |        |        |        |   |  |  |  |        |              |   |  |  |        |              |              |   |  |        |              |              |              |   |                                                                                                                                                                                                                                                                                                                                                                                                                   |  |        |        |        |        |        |   |  |  |  |        |       |   |  |  |        |              |              |   |  |        |              |              |              |   |                                                                                                                                                                                                                                                                                                                                                                                                                   |  |        |        |        |        |        |   |  |  |  |        |              |   |  |  |        |              |              |   |  |        |              |              |              |   |
|         | Ca_eas                                                                                                                                                                                                                                                                                                                                                                                | Ca_wes       | Ca_nor        | Ca_sou      |        |        |        |   |  |  |  |        |       |   |  |  |        |       |       |   |  |        |       |       |       |   |                                                                                                                                                                                                                                                                                                                                                                                                                                 |  |        |        |        |        |        |   |  |  |  |        |              |   |  |  |        |              |              |   |  |        |              |              |              |   |                                                                                                                                                                                                                                                                                                                                                                                                                   |  |        |        |        |        |        |   |  |  |  |        |       |   |  |  |        |              |              |   |  |        |              |              |              |   |                                                                                                                                                                                                                                                                                                                                                                                                                   |  |        |        |        |        |        |   |  |  |  |        |              |   |  |  |        |              |              |   |  |        |              |              |              |   |
| Ca_eas  | 1                                                                                                                                                                                                                                                                                                                                                                                     |              |               |             |        |        |        |   |  |  |  |        |       |   |  |  |        |       |       |   |  |        |       |       |       |   |                                                                                                                                                                                                                                                                                                                                                                                                                                 |  |        |        |        |        |        |   |  |  |  |        |              |   |  |  |        |              |              |   |  |        |              |              |              |   |                                                                                                                                                                                                                                                                                                                                                                                                                   |  |        |        |        |        |        |   |  |  |  |        |       |   |  |  |        |              |              |   |  |        |              |              |              |   |                                                                                                                                                                                                                                                                                                                                                                                                                   |  |        |        |        |        |        |   |  |  |  |        |              |   |  |  |        |              |              |   |  |        |              |              |              |   |
| Ca_wes  | 0.043                                                                                                                                                                                                                                                                                                                                                                                 | 1            |               |             |        |        |        |   |  |  |  |        |       |   |  |  |        |       |       |   |  |        |       |       |       |   |                                                                                                                                                                                                                                                                                                                                                                                                                                 |  |        |        |        |        |        |   |  |  |  |        |              |   |  |  |        |              |              |   |  |        |              |              |              |   |                                                                                                                                                                                                                                                                                                                                                                                                                   |  |        |        |        |        |        |   |  |  |  |        |       |   |  |  |        |              |              |   |  |        |              |              |              |   |                                                                                                                                                                                                                                                                                                                                                                                                                   |  |        |        |        |        |        |   |  |  |  |        |              |   |  |  |        |              |              |   |  |        |              |              |              |   |
| Ca_nor  | <b>0.247</b>                                                                                                                                                                                                                                                                                                                                                                          | 0.128        | 1             |             |        |        |        |   |  |  |  |        |       |   |  |  |        |       |       |   |  |        |       |       |       |   |                                                                                                                                                                                                                                                                                                                                                                                                                                 |  |        |        |        |        |        |   |  |  |  |        |              |   |  |  |        |              |              |   |  |        |              |              |              |   |                                                                                                                                                                                                                                                                                                                                                                                                                   |  |        |        |        |        |        |   |  |  |  |        |       |   |  |  |        |              |              |   |  |        |              |              |              |   |                                                                                                                                                                                                                                                                                                                                                                                                                   |  |        |        |        |        |        |   |  |  |  |        |              |   |  |  |        |              |              |   |  |        |              |              |              |   |
| Ca_sou  | 0.146                                                                                                                                                                                                                                                                                                                                                                                 | 0.094        | 0.108         | 1           |        |        |        |   |  |  |  |        |       |   |  |  |        |       |       |   |  |        |       |       |       |   |                                                                                                                                                                                                                                                                                                                                                                                                                                 |  |        |        |        |        |        |   |  |  |  |        |              |   |  |  |        |              |              |   |  |        |              |              |              |   |                                                                                                                                                                                                                                                                                                                                                                                                                   |  |        |        |        |        |        |   |  |  |  |        |       |   |  |  |        |              |              |   |  |        |              |              |              |   |                                                                                                                                                                                                                                                                                                                                                                                                                   |  |        |        |        |        |        |   |  |  |  |        |              |   |  |  |        |              |              |   |  |        |              |              |              |   |
|         | Ca_eas                                                                                                                                                                                                                                                                                                                                                                                | Ca_wes       | Ca_nor        | Ca_sou      |        |        |        |   |  |  |  |        |       |   |  |  |        |       |       |   |  |        |       |       |       |   |                                                                                                                                                                                                                                                                                                                                                                                                                                 |  |        |        |        |        |        |   |  |  |  |        |              |   |  |  |        |              |              |   |  |        |              |              |              |   |                                                                                                                                                                                                                                                                                                                                                                                                                   |  |        |        |        |        |        |   |  |  |  |        |       |   |  |  |        |              |              |   |  |        |              |              |              |   |                                                                                                                                                                                                                                                                                                                                                                                                                   |  |        |        |        |        |        |   |  |  |  |        |              |   |  |  |        |              |              |   |  |        |              |              |              |   |
| Ca_eas  | 1                                                                                                                                                                                                                                                                                                                                                                                     |              |               |             |        |        |        |   |  |  |  |        |       |   |  |  |        |       |       |   |  |        |       |       |       |   |                                                                                                                                                                                                                                                                                                                                                                                                                                 |  |        |        |        |        |        |   |  |  |  |        |              |   |  |  |        |              |              |   |  |        |              |              |              |   |                                                                                                                                                                                                                                                                                                                                                                                                                   |  |        |        |        |        |        |   |  |  |  |        |       |   |  |  |        |              |              |   |  |        |              |              |              |   |                                                                                                                                                                                                                                                                                                                                                                                                                   |  |        |        |        |        |        |   |  |  |  |        |              |   |  |  |        |              |              |   |  |        |              |              |              |   |
| Ca_wes  | 0.038                                                                                                                                                                                                                                                                                                                                                                                 | 1            |               |             |        |        |        |   |  |  |  |        |       |   |  |  |        |       |       |   |  |        |       |       |       |   |                                                                                                                                                                                                                                                                                                                                                                                                                                 |  |        |        |        |        |        |   |  |  |  |        |              |   |  |  |        |              |              |   |  |        |              |              |              |   |                                                                                                                                                                                                                                                                                                                                                                                                                   |  |        |        |        |        |        |   |  |  |  |        |       |   |  |  |        |              |              |   |  |        |              |              |              |   |                                                                                                                                                                                                                                                                                                                                                                                                                   |  |        |        |        |        |        |   |  |  |  |        |              |   |  |  |        |              |              |   |  |        |              |              |              |   |
| Ca_nor  | <b>0.314</b>                                                                                                                                                                                                                                                                                                                                                                          | <b>0.229</b> | 1             |             |        |        |        |   |  |  |  |        |       |   |  |  |        |       |       |   |  |        |       |       |       |   |                                                                                                                                                                                                                                                                                                                                                                                                                                 |  |        |        |        |        |        |   |  |  |  |        |              |   |  |  |        |              |              |   |  |        |              |              |              |   |                                                                                                                                                                                                                                                                                                                                                                                                                   |  |        |        |        |        |        |   |  |  |  |        |       |   |  |  |        |              |              |   |  |        |              |              |              |   |                                                                                                                                                                                                                                                                                                                                                                                                                   |  |        |        |        |        |        |   |  |  |  |        |              |   |  |  |        |              |              |   |  |        |              |              |              |   |
| Ca_sou  | 0.107                                                                                                                                                                                                                                                                                                                                                                                 | 0.107        | 0.081         | 1           |        |        |        |   |  |  |  |        |       |   |  |  |        |       |       |   |  |        |       |       |       |   |                                                                                                                                                                                                                                                                                                                                                                                                                                 |  |        |        |        |        |        |   |  |  |  |        |              |   |  |  |        |              |              |   |  |        |              |              |              |   |                                                                                                                                                                                                                                                                                                                                                                                                                   |  |        |        |        |        |        |   |  |  |  |        |       |   |  |  |        |              |              |   |  |        |              |              |              |   |                                                                                                                                                                                                                                                                                                                                                                                                                   |  |        |        |        |        |        |   |  |  |  |        |              |   |  |  |        |              |              |   |  |        |              |              |              |   |
| pine #6 | <table> <tr><th></th><th>Ca_eas</th><th>Ca_wes</th><th>Ca_nor</th><th>Ca_sou</th></tr> <tr><th>Ca_eas</th><td>1</td><td></td><td></td><td></td></tr> <tr><th>Ca_wes</th><td>0.887</td><td>1</td><td></td><td></td></tr> <tr><th>Ca_nor</th><td>0.895</td><td>0.954</td><td>1</td><td></td></tr> <tr><th>Ca_sou</th><td>0.924</td><td>0.889</td><td>0.873</td><td>1</td></tr> </table> |              | Ca_eas        | Ca_wes      | Ca_nor | Ca_sou | Ca_eas | 1 |  |  |  | Ca_wes | 0.887 | 1 |  |  | Ca_nor | 0.895 | 0.954 | 1 |  | Ca_sou | 0.924 | 0.889 | 0.873 | 1 | <table> <tr><th></th><th>Ca_eas</th><th>Ca_wes</th><th>Ca_nor</th><th>Ca_sou</th></tr> <tr><th>Ca_eas</th><td>1</td><td></td><td></td><td></td></tr> <tr><th>Ca_wes</th><td>0.140</td><td>1</td><td></td><td></td></tr> <tr><th>Ca_nor</th><td>0.104</td><td><b>0.446</b></td><td>1</td><td></td></tr> <tr><th>Ca_sou</th><td><b>0.284</b></td><td>0.147</td><td>-0.192</td><td>1</td></tr> </table>                            |  | Ca_eas | Ca_wes | Ca_nor | Ca_sou | Ca_eas | 1 |  |  |  | Ca_wes | 0.140        | 1 |  |  | Ca_nor | 0.104        | <b>0.446</b> | 1 |  | Ca_sou | <b>0.284</b> | 0.147        | -0.192       | 1 | <table> <tr><th></th><th>Ca_eas</th><th>Ca_wes</th><th>Ca_nor</th><th>Ca_sou</th></tr> <tr><th>Ca_eas</th><td>1</td><td></td><td></td><td></td></tr> <tr><th>Ca_wes</th><td>0.252</td><td>1</td><td></td><td></td></tr> <tr><th>Ca_nor</th><td>0.081</td><td>0.109</td><td>1</td><td></td></tr> <tr><th>Ca_sou</th><td><b>0.271</b></td><td><b>0.283</b></td><td>-0.082</td><td>1</td></tr> </table>              |  | Ca_eas | Ca_wes | Ca_nor | Ca_sou | Ca_eas | 1 |  |  |  | Ca_wes | 0.252 | 1 |  |  | Ca_nor | 0.081        | 0.109        | 1 |  | Ca_sou | <b>0.271</b> | <b>0.283</b> | -0.082       | 1 | <table> <tr><th></th><th>Ca_eas</th><th>Ca_wes</th><th>Ca_nor</th><th>Ca_sou</th></tr> <tr><th>Ca_eas</th><td>1</td><td></td><td></td><td></td></tr> <tr><th>Ca_wes</th><td>0.109</td><td>1</td><td></td><td></td></tr> <tr><th>Ca_nor</th><td>-0.029</td><td>0.120</td><td>1</td><td></td></tr> <tr><th>Ca_sou</th><td><b>0.317</b></td><td>0.076</td><td>-0.054</td><td>1</td></tr> </table>                    |  | Ca_eas | Ca_wes | Ca_nor | Ca_sou | Ca_eas | 1 |  |  |  | Ca_wes | 0.109        | 1 |  |  | Ca_nor | -0.029       | 0.120        | 1 |  | Ca_sou | <b>0.317</b> | 0.076        | -0.054       | 1 |
|         | Ca_eas                                                                                                                                                                                                                                                                                                                                                                                | Ca_wes       | Ca_nor        | Ca_sou      |        |        |        |   |  |  |  |        |       |   |  |  |        |       |       |   |  |        |       |       |       |   |                                                                                                                                                                                                                                                                                                                                                                                                                                 |  |        |        |        |        |        |   |  |  |  |        |              |   |  |  |        |              |              |   |  |        |              |              |              |   |                                                                                                                                                                                                                                                                                                                                                                                                                   |  |        |        |        |        |        |   |  |  |  |        |       |   |  |  |        |              |              |   |  |        |              |              |              |   |                                                                                                                                                                                                                                                                                                                                                                                                                   |  |        |        |        |        |        |   |  |  |  |        |              |   |  |  |        |              |              |   |  |        |              |              |              |   |
| Ca_eas  | 1                                                                                                                                                                                                                                                                                                                                                                                     |              |               |             |        |        |        |   |  |  |  |        |       |   |  |  |        |       |       |   |  |        |       |       |       |   |                                                                                                                                                                                                                                                                                                                                                                                                                                 |  |        |        |        |        |        |   |  |  |  |        |              |   |  |  |        |              |              |   |  |        |              |              |              |   |                                                                                                                                                                                                                                                                                                                                                                                                                   |  |        |        |        |        |        |   |  |  |  |        |       |   |  |  |        |              |              |   |  |        |              |              |              |   |                                                                                                                                                                                                                                                                                                                                                                                                                   |  |        |        |        |        |        |   |  |  |  |        |              |   |  |  |        |              |              |   |  |        |              |              |              |   |
| Ca_wes  | 0.887                                                                                                                                                                                                                                                                                                                                                                                 | 1            |               |             |        |        |        |   |  |  |  |        |       |   |  |  |        |       |       |   |  |        |       |       |       |   |                                                                                                                                                                                                                                                                                                                                                                                                                                 |  |        |        |        |        |        |   |  |  |  |        |              |   |  |  |        |              |              |   |  |        |              |              |              |   |                                                                                                                                                                                                                                                                                                                                                                                                                   |  |        |        |        |        |        |   |  |  |  |        |       |   |  |  |        |              |              |   |  |        |              |              |              |   |                                                                                                                                                                                                                                                                                                                                                                                                                   |  |        |        |        |        |        |   |  |  |  |        |              |   |  |  |        |              |              |   |  |        |              |              |              |   |
| Ca_nor  | 0.895                                                                                                                                                                                                                                                                                                                                                                                 | 0.954        | 1             |             |        |        |        |   |  |  |  |        |       |   |  |  |        |       |       |   |  |        |       |       |       |   |                                                                                                                                                                                                                                                                                                                                                                                                                                 |  |        |        |        |        |        |   |  |  |  |        |              |   |  |  |        |              |              |   |  |        |              |              |              |   |                                                                                                                                                                                                                                                                                                                                                                                                                   |  |        |        |        |        |        |   |  |  |  |        |       |   |  |  |        |              |              |   |  |        |              |              |              |   |                                                                                                                                                                                                                                                                                                                                                                                                                   |  |        |        |        |        |        |   |  |  |  |        |              |   |  |  |        |              |              |   |  |        |              |              |              |   |
| Ca_sou  | 0.924                                                                                                                                                                                                                                                                                                                                                                                 | 0.889        | 0.873         | 1           |        |        |        |   |  |  |  |        |       |   |  |  |        |       |       |   |  |        |       |       |       |   |                                                                                                                                                                                                                                                                                                                                                                                                                                 |  |        |        |        |        |        |   |  |  |  |        |              |   |  |  |        |              |              |   |  |        |              |              |              |   |                                                                                                                                                                                                                                                                                                                                                                                                                   |  |        |        |        |        |        |   |  |  |  |        |       |   |  |  |        |              |              |   |  |        |              |              |              |   |                                                                                                                                                                                                                                                                                                                                                                                                                   |  |        |        |        |        |        |   |  |  |  |        |              |   |  |  |        |              |              |   |  |        |              |              |              |   |
|         | Ca_eas                                                                                                                                                                                                                                                                                                                                                                                | Ca_wes       | Ca_nor        | Ca_sou      |        |        |        |   |  |  |  |        |       |   |  |  |        |       |       |   |  |        |       |       |       |   |                                                                                                                                                                                                                                                                                                                                                                                                                                 |  |        |        |        |        |        |   |  |  |  |        |              |   |  |  |        |              |              |   |  |        |              |              |              |   |                                                                                                                                                                                                                                                                                                                                                                                                                   |  |        |        |        |        |        |   |  |  |  |        |       |   |  |  |        |              |              |   |  |        |              |              |              |   |                                                                                                                                                                                                                                                                                                                                                                                                                   |  |        |        |        |        |        |   |  |  |  |        |              |   |  |  |        |              |              |   |  |        |              |              |              |   |
| Ca_eas  | 1                                                                                                                                                                                                                                                                                                                                                                                     |              |               |             |        |        |        |   |  |  |  |        |       |   |  |  |        |       |       |   |  |        |       |       |       |   |                                                                                                                                                                                                                                                                                                                                                                                                                                 |  |        |        |        |        |        |   |  |  |  |        |              |   |  |  |        |              |              |   |  |        |              |              |              |   |                                                                                                                                                                                                                                                                                                                                                                                                                   |  |        |        |        |        |        |   |  |  |  |        |       |   |  |  |        |              |              |   |  |        |              |              |              |   |                                                                                                                                                                                                                                                                                                                                                                                                                   |  |        |        |        |        |        |   |  |  |  |        |              |   |  |  |        |              |              |   |  |        |              |              |              |   |
| Ca_wes  | 0.140                                                                                                                                                                                                                                                                                                                                                                                 | 1            |               |             |        |        |        |   |  |  |  |        |       |   |  |  |        |       |       |   |  |        |       |       |       |   |                                                                                                                                                                                                                                                                                                                                                                                                                                 |  |        |        |        |        |        |   |  |  |  |        |              |   |  |  |        |              |              |   |  |        |              |              |              |   |                                                                                                                                                                                                                                                                                                                                                                                                                   |  |        |        |        |        |        |   |  |  |  |        |       |   |  |  |        |              |              |   |  |        |              |              |              |   |                                                                                                                                                                                                                                                                                                                                                                                                                   |  |        |        |        |        |        |   |  |  |  |        |              |   |  |  |        |              |              |   |  |        |              |              |              |   |
| Ca_nor  | 0.104                                                                                                                                                                                                                                                                                                                                                                                 | <b>0.446</b> | 1             |             |        |        |        |   |  |  |  |        |       |   |  |  |        |       |       |   |  |        |       |       |       |   |                                                                                                                                                                                                                                                                                                                                                                                                                                 |  |        |        |        |        |        |   |  |  |  |        |              |   |  |  |        |              |              |   |  |        |              |              |              |   |                                                                                                                                                                                                                                                                                                                                                                                                                   |  |        |        |        |        |        |   |  |  |  |        |       |   |  |  |        |              |              |   |  |        |              |              |              |   |                                                                                                                                                                                                                                                                                                                                                                                                                   |  |        |        |        |        |        |   |  |  |  |        |              |   |  |  |        |              |              |   |  |        |              |              |              |   |
| Ca_sou  | <b>0.284</b>                                                                                                                                                                                                                                                                                                                                                                          | 0.147        | -0.192        | 1           |        |        |        |   |  |  |  |        |       |   |  |  |        |       |       |   |  |        |       |       |       |   |                                                                                                                                                                                                                                                                                                                                                                                                                                 |  |        |        |        |        |        |   |  |  |  |        |              |   |  |  |        |              |              |   |  |        |              |              |              |   |                                                                                                                                                                                                                                                                                                                                                                                                                   |  |        |        |        |        |        |   |  |  |  |        |       |   |  |  |        |              |              |   |  |        |              |              |              |   |                                                                                                                                                                                                                                                                                                                                                                                                                   |  |        |        |        |        |        |   |  |  |  |        |              |   |  |  |        |              |              |   |  |        |              |              |              |   |
|         | Ca_eas                                                                                                                                                                                                                                                                                                                                                                                | Ca_wes       | Ca_nor        | Ca_sou      |        |        |        |   |  |  |  |        |       |   |  |  |        |       |       |   |  |        |       |       |       |   |                                                                                                                                                                                                                                                                                                                                                                                                                                 |  |        |        |        |        |        |   |  |  |  |        |              |   |  |  |        |              |              |   |  |        |              |              |              |   |                                                                                                                                                                                                                                                                                                                                                                                                                   |  |        |        |        |        |        |   |  |  |  |        |       |   |  |  |        |              |              |   |  |        |              |              |              |   |                                                                                                                                                                                                                                                                                                                                                                                                                   |  |        |        |        |        |        |   |  |  |  |        |              |   |  |  |        |              |              |   |  |        |              |              |              |   |
| Ca_eas  | 1                                                                                                                                                                                                                                                                                                                                                                                     |              |               |             |        |        |        |   |  |  |  |        |       |   |  |  |        |       |       |   |  |        |       |       |       |   |                                                                                                                                                                                                                                                                                                                                                                                                                                 |  |        |        |        |        |        |   |  |  |  |        |              |   |  |  |        |              |              |   |  |        |              |              |              |   |                                                                                                                                                                                                                                                                                                                                                                                                                   |  |        |        |        |        |        |   |  |  |  |        |       |   |  |  |        |              |              |   |  |        |              |              |              |   |                                                                                                                                                                                                                                                                                                                                                                                                                   |  |        |        |        |        |        |   |  |  |  |        |              |   |  |  |        |              |              |   |  |        |              |              |              |   |
| Ca_wes  | 0.252                                                                                                                                                                                                                                                                                                                                                                                 | 1            |               |             |        |        |        |   |  |  |  |        |       |   |  |  |        |       |       |   |  |        |       |       |       |   |                                                                                                                                                                                                                                                                                                                                                                                                                                 |  |        |        |        |        |        |   |  |  |  |        |              |   |  |  |        |              |              |   |  |        |              |              |              |   |                                                                                                                                                                                                                                                                                                                                                                                                                   |  |        |        |        |        |        |   |  |  |  |        |       |   |  |  |        |              |              |   |  |        |              |              |              |   |                                                                                                                                                                                                                                                                                                                                                                                                                   |  |        |        |        |        |        |   |  |  |  |        |              |   |  |  |        |              |              |   |  |        |              |              |              |   |
| Ca_nor  | 0.081                                                                                                                                                                                                                                                                                                                                                                                 | 0.109        | 1             |             |        |        |        |   |  |  |  |        |       |   |  |  |        |       |       |   |  |        |       |       |       |   |                                                                                                                                                                                                                                                                                                                                                                                                                                 |  |        |        |        |        |        |   |  |  |  |        |              |   |  |  |        |              |              |   |  |        |              |              |              |   |                                                                                                                                                                                                                                                                                                                                                                                                                   |  |        |        |        |        |        |   |  |  |  |        |       |   |  |  |        |              |              |   |  |        |              |              |              |   |                                                                                                                                                                                                                                                                                                                                                                                                                   |  |        |        |        |        |        |   |  |  |  |        |              |   |  |  |        |              |              |   |  |        |              |              |              |   |
| Ca_sou  | <b>0.271</b>                                                                                                                                                                                                                                                                                                                                                                          | <b>0.283</b> | -0.082        | 1           |        |        |        |   |  |  |  |        |       |   |  |  |        |       |       |   |  |        |       |       |       |   |                                                                                                                                                                                                                                                                                                                                                                                                                                 |  |        |        |        |        |        |   |  |  |  |        |              |   |  |  |        |              |              |   |  |        |              |              |              |   |                                                                                                                                                                                                                                                                                                                                                                                                                   |  |        |        |        |        |        |   |  |  |  |        |       |   |  |  |        |              |              |   |  |        |              |              |              |   |                                                                                                                                                                                                                                                                                                                                                                                                                   |  |        |        |        |        |        |   |  |  |  |        |              |   |  |  |        |              |              |   |  |        |              |              |              |   |
|         | Ca_eas                                                                                                                                                                                                                                                                                                                                                                                | Ca_wes       | Ca_nor        | Ca_sou      |        |        |        |   |  |  |  |        |       |   |  |  |        |       |       |   |  |        |       |       |       |   |                                                                                                                                                                                                                                                                                                                                                                                                                                 |  |        |        |        |        |        |   |  |  |  |        |              |   |  |  |        |              |              |   |  |        |              |              |              |   |                                                                                                                                                                                                                                                                                                                                                                                                                   |  |        |        |        |        |        |   |  |  |  |        |       |   |  |  |        |              |              |   |  |        |              |              |              |   |                                                                                                                                                                                                                                                                                                                                                                                                                   |  |        |        |        |        |        |   |  |  |  |        |              |   |  |  |        |              |              |   |  |        |              |              |              |   |
| Ca_eas  | 1                                                                                                                                                                                                                                                                                                                                                                                     |              |               |             |        |        |        |   |  |  |  |        |       |   |  |  |        |       |       |   |  |        |       |       |       |   |                                                                                                                                                                                                                                                                                                                                                                                                                                 |  |        |        |        |        |        |   |  |  |  |        |              |   |  |  |        |              |              |   |  |        |              |              |              |   |                                                                                                                                                                                                                                                                                                                                                                                                                   |  |        |        |        |        |        |   |  |  |  |        |       |   |  |  |        |              |              |   |  |        |              |              |              |   |                                                                                                                                                                                                                                                                                                                                                                                                                   |  |        |        |        |        |        |   |  |  |  |        |              |   |  |  |        |              |              |   |  |        |              |              |              |   |
| Ca_wes  | 0.109                                                                                                                                                                                                                                                                                                                                                                                 | 1            |               |             |        |        |        |   |  |  |  |        |       |   |  |  |        |       |       |   |  |        |       |       |       |   |                                                                                                                                                                                                                                                                                                                                                                                                                                 |  |        |        |        |        |        |   |  |  |  |        |              |   |  |  |        |              |              |   |  |        |              |              |              |   |                                                                                                                                                                                                                                                                                                                                                                                                                   |  |        |        |        |        |        |   |  |  |  |        |       |   |  |  |        |              |              |   |  |        |              |              |              |   |                                                                                                                                                                                                                                                                                                                                                                                                                   |  |        |        |        |        |        |   |  |  |  |        |              |   |  |  |        |              |              |   |  |        |              |              |              |   |
| Ca_nor  | -0.029                                                                                                                                                                                                                                                                                                                                                                                | 0.120        | 1             |             |        |        |        |   |  |  |  |        |       |   |  |  |        |       |       |   |  |        |       |       |       |   |                                                                                                                                                                                                                                                                                                                                                                                                                                 |  |        |        |        |        |        |   |  |  |  |        |              |   |  |  |        |              |              |   |  |        |              |              |              |   |                                                                                                                                                                                                                                                                                                                                                                                                                   |  |        |        |        |        |        |   |  |  |  |        |       |   |  |  |        |              |              |   |  |        |              |              |              |   |                                                                                                                                                                                                                                                                                                                                                                                                                   |  |        |        |        |        |        |   |  |  |  |        |              |   |  |  |        |              |              |   |  |        |              |              |              |   |
| Ca_sou  | <b>0.317</b>                                                                                                                                                                                                                                                                                                                                                                          | 0.076        | -0.054        | 1           |        |        |        |   |  |  |  |        |       |   |  |  |        |       |       |   |  |        |       |       |       |   |                                                                                                                                                                                                                                                                                                                                                                                                                                 |  |        |        |        |        |        |   |  |  |  |        |              |   |  |  |        |              |              |   |  |        |              |              |              |   |                                                                                                                                                                                                                                                                                                                                                                                                                   |  |        |        |        |        |        |   |  |  |  |        |       |   |  |  |        |              |              |   |  |        |              |              |              |   |                                                                                                                                                                                                                                                                                                                                                                                                                   |  |        |        |        |        |        |   |  |  |  |        |              |   |  |  |        |              |              |   |  |        |              |              |              |   |

**Bold font** = significant at  $p < 0.001$   
 Normal font = significant at  $p < 0.05$
