# Supplementary material
Source: MDPI journal article supplement (https://www.mdpi.com/1424-2818/15/2/281)
Supplement: s1 [file s1]

Table S4. Correlation matrices for K after detrending.

|              | No detrending                                                                                                                                                                                                                                                                                                                                                                                                                         | Hugershof    | Smooth spline | Derivatives  |              |              |              |   |  |  |  |              |       |   |  |  |              |       |       |   |  |              |       |       |       |   |                                                                                                                                                                                                                                                                                                                                                                                                                                                                                 |  |              |              |              |              |              |   |  |  |  |              |              |   |  |  |              |              |              |   |  |              |              |              |              |   |                                                                                                                                                                                                                                                                                                                                                                                                                                                |  |              |              |              |              |              |   |  |  |  |              |        |   |  |  |              |        |              |   |  |              |        |              |        |   |                                                                                                                                                                                                                                                                                                                                                                                                                                                                                 |  |              |              |              |              |              |   |  |  |  |              |              |   |  |  |              |              |              |   |  |              |              |              |              |   |
|--------------|---------------------------------------------------------------------------------------------------------------------------------------------------------------------------------------------------------------------------------------------------------------------------------------------------------------------------------------------------------------------------------------------------------------------------------------|--------------|---------------|--------------|--------------|--------------|--------------|---|--|--|--|--------------|-------|---|--|--|--------------|-------|-------|---|--|--------------|-------|-------|-------|---|---------------------------------------------------------------------------------------------------------------------------------------------------------------------------------------------------------------------------------------------------------------------------------------------------------------------------------------------------------------------------------------------------------------------------------------------------------------------------------|--|--------------|--------------|--------------|--------------|--------------|---|--|--|--|--------------|--------------|---|--|--|--------------|--------------|--------------|---|--|--------------|--------------|--------------|--------------|---|------------------------------------------------------------------------------------------------------------------------------------------------------------------------------------------------------------------------------------------------------------------------------------------------------------------------------------------------------------------------------------------------------------------------------------------------|--|--------------|--------------|--------------|--------------|--------------|---|--|--|--|--------------|--------|---|--|--|--------------|--------|--------------|---|--|--------------|--------|--------------|--------|---|---------------------------------------------------------------------------------------------------------------------------------------------------------------------------------------------------------------------------------------------------------------------------------------------------------------------------------------------------------------------------------------------------------------------------------------------------------------------------------|--|--------------|--------------|--------------|--------------|--------------|---|--|--|--|--------------|--------------|---|--|--|--------------|--------------|--------------|---|--|--------------|--------------|--------------|--------------|---|
| pine #1      | <table> <tr><th></th><th><i>K_eas</i></th><th><i>K_wes</i></th><th><i>K_nor</i></th><th><i>K_sou</i></th></tr> <tr><th><i>K_eas</i></th><td>1</td><td></td><td></td><td></td></tr> <tr><th><i>K_wes</i></th><td>0.893</td><td>1</td><td></td><td></td></tr> <tr><th><i>K_nor</i></th><td>0.919</td><td>0.912</td><td>1</td><td></td></tr> <tr><th><i>K_sou</i></th><td>0.683</td><td>0.639</td><td>0.668</td><td>1</td></tr> </table> |              | <i>K_eas</i>  | <i>K_wes</i> | <i>K_nor</i> | <i>K_sou</i> | <i>K_eas</i> | 1 |  |  |  | <i>K_wes</i> | 0.893 | 1 |  |  | <i>K_nor</i> | 0.919 | 0.912 | 1 |  | <i>K_sou</i> | 0.683 | 0.639 | 0.668 | 1 | <table> <tr><th></th><th><i>K_eas</i></th><th><i>K_wes</i></th><th><i>K_nor</i></th><th><i>K_sou</i></th></tr> <tr><th><i>K_eas</i></th><td>1</td><td></td><td></td><td></td></tr> <tr><th><i>K_wes</i></th><td><b>0.673</b></td><td>1</td><td></td><td></td></tr> <tr><th><i>K_nor</i></th><td><b>0.717</b></td><td><b>0.867</b></td><td>1</td><td></td></tr> <tr><th><i>K_sou</i></th><td><b>0.448</b></td><td>0.302</td><td><b>0.306</b></td><td>1</td></tr> </table>        |  | <i>K_eas</i> | <i>K_wes</i> | <i>K_nor</i> | <i>K_sou</i> | <i>K_eas</i> | 1 |  |  |  | <i>K_wes</i> | <b>0.673</b> | 1 |  |  | <i>K_nor</i> | <b>0.717</b> | <b>0.867</b> | 1 |  | <i>K_sou</i> | <b>0.448</b> | 0.302        | <b>0.306</b> | 1 | <table> <tr><th></th><th><i>K_eas</i></th><th><i>K_wes</i></th><th><i>K_nor</i></th><th><i>K_sou</i></th></tr> <tr><th><i>K_eas</i></th><td>1</td><td></td><td></td><td></td></tr> <tr><th><i>K_wes</i></th><td>0.175</td><td>1</td><td></td><td></td></tr> <tr><th><i>K_nor</i></th><td>0.134</td><td>0.184</td><td>1</td><td></td></tr> <tr><th><i>K_sou</i></th><td>0.043</td><td>-0.121</td><td>0.074</td><td>1</td></tr> </table>         |  | <i>K_eas</i> | <i>K_wes</i> | <i>K_nor</i> | <i>K_sou</i> | <i>K_eas</i> | 1 |  |  |  | <i>K_wes</i> | 0.175  | 1 |  |  | <i>K_nor</i> | 0.134  | 0.184        | 1 |  | <i>K_sou</i> | 0.043  | -0.121       | 0.074  | 1 | <table> <tr><th></th><th><i>K_eas</i></th><th><i>K_wes</i></th><th><i>K_nor</i></th><th><i>K_sou</i></th></tr> <tr><th><i>K_eas</i></th><td>1</td><td></td><td></td><td></td></tr> <tr><th><i>K_wes</i></th><td><b>0.285</b></td><td>1</td><td></td><td></td></tr> <tr><th><i>K_nor</i></th><td>0.183</td><td><b>0.263</b></td><td>1</td><td></td></tr> <tr><th><i>K_sou</i></th><td>0.170</td><td>0.074</td><td>0.143</td><td>1</td></tr> </table>                             |  | <i>K_eas</i> | <i>K_wes</i> | <i>K_nor</i> | <i>K_sou</i> | <i>K_eas</i> | 1 |  |  |  | <i>K_wes</i> | <b>0.285</b> | 1 |  |  | <i>K_nor</i> | 0.183        | <b>0.263</b> | 1 |  | <i>K_sou</i> | 0.170        | 0.074        | 0.143        | 1 |
|              | <i>K_eas</i>                                                                                                                                                                                                                                                                                                                                                                                                                          | <i>K_wes</i> | <i>K_nor</i>  | <i>K_sou</i> |              |              |              |   |  |  |  |              |       |   |  |  |              |       |       |   |  |              |       |       |       |   |                                                                                                                                                                                                                                                                                                                                                                                                                                                                                 |  |              |              |              |              |              |   |  |  |  |              |              |   |  |  |              |              |              |   |  |              |              |              |              |   |                                                                                                                                                                                                                                                                                                                                                                                                                                                |  |              |              |              |              |              |   |  |  |  |              |        |   |  |  |              |        |              |   |  |              |        |              |        |   |                                                                                                                                                                                                                                                                                                                                                                                                                                                                                 |  |              |              |              |              |              |   |  |  |  |              |              |   |  |  |              |              |              |   |  |              |              |              |              |   |
| <i>K_eas</i> | 1                                                                                                                                                                                                                                                                                                                                                                                                                                     |              |               |              |              |              |              |   |  |  |  |              |       |   |  |  |              |       |       |   |  |              |       |       |       |   |                                                                                                                                                                                                                                                                                                                                                                                                                                                                                 |  |              |              |              |              |              |   |  |  |  |              |              |   |  |  |              |              |              |   |  |              |              |              |              |   |                                                                                                                                                                                                                                                                                                                                                                                                                                                |  |              |              |              |              |              |   |  |  |  |              |        |   |  |  |              |        |              |   |  |              |        |              |        |   |                                                                                                                                                                                                                                                                                                                                                                                                                                                                                 |  |              |              |              |              |              |   |  |  |  |              |              |   |  |  |              |              |              |   |  |              |              |              |              |   |
| <i>K_wes</i> | 0.893                                                                                                                                                                                                                                                                                                                                                                                                                                 | 1            |               |              |              |              |              |   |  |  |  |              |       |   |  |  |              |       |       |   |  |              |       |       |       |   |                                                                                                                                                                                                                                                                                                                                                                                                                                                                                 |  |              |              |              |              |              |   |  |  |  |              |              |   |  |  |              |              |              |   |  |              |              |              |              |   |                                                                                                                                                                                                                                                                                                                                                                                                                                                |  |              |              |              |              |              |   |  |  |  |              |        |   |  |  |              |        |              |   |  |              |        |              |        |   |                                                                                                                                                                                                                                                                                                                                                                                                                                                                                 |  |              |              |              |              |              |   |  |  |  |              |              |   |  |  |              |              |              |   |  |              |              |              |              |   |
| <i>K_nor</i> | 0.919                                                                                                                                                                                                                                                                                                                                                                                                                                 | 0.912        | 1             |              |              |              |              |   |  |  |  |              |       |   |  |  |              |       |       |   |  |              |       |       |       |   |                                                                                                                                                                                                                                                                                                                                                                                                                                                                                 |  |              |              |              |              |              |   |  |  |  |              |              |   |  |  |              |              |              |   |  |              |              |              |              |   |                                                                                                                                                                                                                                                                                                                                                                                                                                                |  |              |              |              |              |              |   |  |  |  |              |        |   |  |  |              |        |              |   |  |              |        |              |        |   |                                                                                                                                                                                                                                                                                                                                                                                                                                                                                 |  |              |              |              |              |              |   |  |  |  |              |              |   |  |  |              |              |              |   |  |              |              |              |              |   |
| <i>K_sou</i> | 0.683                                                                                                                                                                                                                                                                                                                                                                                                                                 | 0.639        | 0.668         | 1            |              |              |              |   |  |  |  |              |       |   |  |  |              |       |       |   |  |              |       |       |       |   |                                                                                                                                                                                                                                                                                                                                                                                                                                                                                 |  |              |              |              |              |              |   |  |  |  |              |              |   |  |  |              |              |              |   |  |              |              |              |              |   |                                                                                                                                                                                                                                                                                                                                                                                                                                                |  |              |              |              |              |              |   |  |  |  |              |        |   |  |  |              |        |              |   |  |              |        |              |        |   |                                                                                                                                                                                                                                                                                                                                                                                                                                                                                 |  |              |              |              |              |              |   |  |  |  |              |              |   |  |  |              |              |              |   |  |              |              |              |              |   |
|              | <i>K_eas</i>                                                                                                                                                                                                                                                                                                                                                                                                                          | <i>K_wes</i> | <i>K_nor</i>  | <i>K_sou</i> |              |              |              |   |  |  |  |              |       |   |  |  |              |       |       |   |  |              |       |       |       |   |                                                                                                                                                                                                                                                                                                                                                                                                                                                                                 |  |              |              |              |              |              |   |  |  |  |              |              |   |  |  |              |              |              |   |  |              |              |              |              |   |                                                                                                                                                                                                                                                                                                                                                                                                                                                |  |              |              |              |              |              |   |  |  |  |              |        |   |  |  |              |        |              |   |  |              |        |              |        |   |                                                                                                                                                                                                                                                                                                                                                                                                                                                                                 |  |              |              |              |              |              |   |  |  |  |              |              |   |  |  |              |              |              |   |  |              |              |              |              |   |
| <i>K_eas</i> | 1                                                                                                                                                                                                                                                                                                                                                                                                                                     |              |               |              |              |              |              |   |  |  |  |              |       |   |  |  |              |       |       |   |  |              |       |       |       |   |                                                                                                                                                                                                                                                                                                                                                                                                                                                                                 |  |              |              |              |              |              |   |  |  |  |              |              |   |  |  |              |              |              |   |  |              |              |              |              |   |                                                                                                                                                                                                                                                                                                                                                                                                                                                |  |              |              |              |              |              |   |  |  |  |              |        |   |  |  |              |        |              |   |  |              |        |              |        |   |                                                                                                                                                                                                                                                                                                                                                                                                                                                                                 |  |              |              |              |              |              |   |  |  |  |              |              |   |  |  |              |              |              |   |  |              |              |              |              |   |
| <i>K_wes</i> | <b>0.673</b>                                                                                                                                                                                                                                                                                                                                                                                                                          | 1            |               |              |              |              |              |   |  |  |  |              |       |   |  |  |              |       |       |   |  |              |       |       |       |   |                                                                                                                                                                                                                                                                                                                                                                                                                                                                                 |  |              |              |              |              |              |   |  |  |  |              |              |   |  |  |              |              |              |   |  |              |              |              |              |   |                                                                                                                                                                                                                                                                                                                                                                                                                                                |  |              |              |              |              |              |   |  |  |  |              |        |   |  |  |              |        |              |   |  |              |        |              |        |   |                                                                                                                                                                                                                                                                                                                                                                                                                                                                                 |  |              |              |              |              |              |   |  |  |  |              |              |   |  |  |              |              |              |   |  |              |              |              |              |   |
| <i>K_nor</i> | <b>0.717</b>                                                                                                                                                                                                                                                                                                                                                                                                                          | <b>0.867</b> | 1             |              |              |              |              |   |  |  |  |              |       |   |  |  |              |       |       |   |  |              |       |       |       |   |                                                                                                                                                                                                                                                                                                                                                                                                                                                                                 |  |              |              |              |              |              |   |  |  |  |              |              |   |  |  |              |              |              |   |  |              |              |              |              |   |                                                                                                                                                                                                                                                                                                                                                                                                                                                |  |              |              |              |              |              |   |  |  |  |              |        |   |  |  |              |        |              |   |  |              |        |              |        |   |                                                                                                                                                                                                                                                                                                                                                                                                                                                                                 |  |              |              |              |              |              |   |  |  |  |              |              |   |  |  |              |              |              |   |  |              |              |              |              |   |
| <i>K_sou</i> | <b>0.448</b>                                                                                                                                                                                                                                                                                                                                                                                                                          | 0.302        | <b>0.306</b>  | 1            |              |              |              |   |  |  |  |              |       |   |  |  |              |       |       |   |  |              |       |       |       |   |                                                                                                                                                                                                                                                                                                                                                                                                                                                                                 |  |              |              |              |              |              |   |  |  |  |              |              |   |  |  |              |              |              |   |  |              |              |              |              |   |                                                                                                                                                                                                                                                                                                                                                                                                                                                |  |              |              |              |              |              |   |  |  |  |              |        |   |  |  |              |        |              |   |  |              |        |              |        |   |                                                                                                                                                                                                                                                                                                                                                                                                                                                                                 |  |              |              |              |              |              |   |  |  |  |              |              |   |  |  |              |              |              |   |  |              |              |              |              |   |
|              | <i>K_eas</i>                                                                                                                                                                                                                                                                                                                                                                                                                          | <i>K_wes</i> | <i>K_nor</i>  | <i>K_sou</i> |              |              |              |   |  |  |  |              |       |   |  |  |              |       |       |   |  |              |       |       |       |   |                                                                                                                                                                                                                                                                                                                                                                                                                                                                                 |  |              |              |              |              |              |   |  |  |  |              |              |   |  |  |              |              |              |   |  |              |              |              |              |   |                                                                                                                                                                                                                                                                                                                                                                                                                                                |  |              |              |              |              |              |   |  |  |  |              |        |   |  |  |              |        |              |   |  |              |        |              |        |   |                                                                                                                                                                                                                                                                                                                                                                                                                                                                                 |  |              |              |              |              |              |   |  |  |  |              |              |   |  |  |              |              |              |   |  |              |              |              |              |   |
| <i>K_eas</i> | 1                                                                                                                                                                                                                                                                                                                                                                                                                                     |              |               |              |              |              |              |   |  |  |  |              |       |   |  |  |              |       |       |   |  |              |       |       |       |   |                                                                                                                                                                                                                                                                                                                                                                                                                                                                                 |  |              |              |              |              |              |   |  |  |  |              |              |   |  |  |              |              |              |   |  |              |              |              |              |   |                                                                                                                                                                                                                                                                                                                                                                                                                                                |  |              |              |              |              |              |   |  |  |  |              |        |   |  |  |              |        |              |   |  |              |        |              |        |   |                                                                                                                                                                                                                                                                                                                                                                                                                                                                                 |  |              |              |              |              |              |   |  |  |  |              |              |   |  |  |              |              |              |   |  |              |              |              |              |   |
| <i>K_wes</i> | 0.175                                                                                                                                                                                                                                                                                                                                                                                                                                 | 1            |               |              |              |              |              |   |  |  |  |              |       |   |  |  |              |       |       |   |  |              |       |       |       |   |                                                                                                                                                                                                                                                                                                                                                                                                                                                                                 |  |              |              |              |              |              |   |  |  |  |              |              |   |  |  |              |              |              |   |  |              |              |              |              |   |                                                                                                                                                                                                                                                                                                                                                                                                                                                |  |              |              |              |              |              |   |  |  |  |              |        |   |  |  |              |        |              |   |  |              |        |              |        |   |                                                                                                                                                                                                                                                                                                                                                                                                                                                                                 |  |              |              |              |              |              |   |  |  |  |              |              |   |  |  |              |              |              |   |  |              |              |              |              |   |
| <i>K_nor</i> | 0.134                                                                                                                                                                                                                                                                                                                                                                                                                                 | 0.184        | 1             |              |              |              |              |   |  |  |  |              |       |   |  |  |              |       |       |   |  |              |       |       |       |   |                                                                                                                                                                                                                                                                                                                                                                                                                                                                                 |  |              |              |              |              |              |   |  |  |  |              |              |   |  |  |              |              |              |   |  |              |              |              |              |   |                                                                                                                                                                                                                                                                                                                                                                                                                                                |  |              |              |              |              |              |   |  |  |  |              |        |   |  |  |              |        |              |   |  |              |        |              |        |   |                                                                                                                                                                                                                                                                                                                                                                                                                                                                                 |  |              |              |              |              |              |   |  |  |  |              |              |   |  |  |              |              |              |   |  |              |              |              |              |   |
| <i>K_sou</i> | 0.043                                                                                                                                                                                                                                                                                                                                                                                                                                 | -0.121       | 0.074         | 1            |              |              |              |   |  |  |  |              |       |   |  |  |              |       |       |   |  |              |       |       |       |   |                                                                                                                                                                                                                                                                                                                                                                                                                                                                                 |  |              |              |              |              |              |   |  |  |  |              |              |   |  |  |              |              |              |   |  |              |              |              |              |   |                                                                                                                                                                                                                                                                                                                                                                                                                                                |  |              |              |              |              |              |   |  |  |  |              |        |   |  |  |              |        |              |   |  |              |        |              |        |   |                                                                                                                                                                                                                                                                                                                                                                                                                                                                                 |  |              |              |              |              |              |   |  |  |  |              |              |   |  |  |              |              |              |   |  |              |              |              |              |   |
|              | <i>K_eas</i>                                                                                                                                                                                                                                                                                                                                                                                                                          | <i>K_wes</i> | <i>K_nor</i>  | <i>K_sou</i> |              |              |              |   |  |  |  |              |       |   |  |  |              |       |       |   |  |              |       |       |       |   |                                                                                                                                                                                                                                                                                                                                                                                                                                                                                 |  |              |              |              |              |              |   |  |  |  |              |              |   |  |  |              |              |              |   |  |              |              |              |              |   |                                                                                                                                                                                                                                                                                                                                                                                                                                                |  |              |              |              |              |              |   |  |  |  |              |        |   |  |  |              |        |              |   |  |              |        |              |        |   |                                                                                                                                                                                                                                                                                                                                                                                                                                                                                 |  |              |              |              |              |              |   |  |  |  |              |              |   |  |  |              |              |              |   |  |              |              |              |              |   |
| <i>K_eas</i> | 1                                                                                                                                                                                                                                                                                                                                                                                                                                     |              |               |              |              |              |              |   |  |  |  |              |       |   |  |  |              |       |       |   |  |              |       |       |       |   |                                                                                                                                                                                                                                                                                                                                                                                                                                                                                 |  |              |              |              |              |              |   |  |  |  |              |              |   |  |  |              |              |              |   |  |              |              |              |              |   |                                                                                                                                                                                                                                                                                                                                                                                                                                                |  |              |              |              |              |              |   |  |  |  |              |        |   |  |  |              |        |              |   |  |              |        |              |        |   |                                                                                                                                                                                                                                                                                                                                                                                                                                                                                 |  |              |              |              |              |              |   |  |  |  |              |              |   |  |  |              |              |              |   |  |              |              |              |              |   |
| <i>K_wes</i> | <b>0.285</b>                                                                                                                                                                                                                                                                                                                                                                                                                          | 1            |               |              |              |              |              |   |  |  |  |              |       |   |  |  |              |       |       |   |  |              |       |       |       |   |                                                                                                                                                                                                                                                                                                                                                                                                                                                                                 |  |              |              |              |              |              |   |  |  |  |              |              |   |  |  |              |              |              |   |  |              |              |              |              |   |                                                                                                                                                                                                                                                                                                                                                                                                                                                |  |              |              |              |              |              |   |  |  |  |              |        |   |  |  |              |        |              |   |  |              |        |              |        |   |                                                                                                                                                                                                                                                                                                                                                                                                                                                                                 |  |              |              |              |              |              |   |  |  |  |              |              |   |  |  |              |              |              |   |  |              |              |              |              |   |
| <i>K_nor</i> | 0.183                                                                                                                                                                                                                                                                                                                                                                                                                                 | <b>0.263</b> | 1             |              |              |              |              |   |  |  |  |              |       |   |  |  |              |       |       |   |  |              |       |       |       |   |                                                                                                                                                                                                                                                                                                                                                                                                                                                                                 |  |              |              |              |              |              |   |  |  |  |              |              |   |  |  |              |              |              |   |  |              |              |              |              |   |                                                                                                                                                                                                                                                                                                                                                                                                                                                |  |              |              |              |              |              |   |  |  |  |              |        |   |  |  |              |        |              |   |  |              |        |              |        |   |                                                                                                                                                                                                                                                                                                                                                                                                                                                                                 |  |              |              |              |              |              |   |  |  |  |              |              |   |  |  |              |              |              |   |  |              |              |              |              |   |
| <i>K_sou</i> | 0.170                                                                                                                                                                                                                                                                                                                                                                                                                                 | 0.074        | 0.143         | 1            |              |              |              |   |  |  |  |              |       |   |  |  |              |       |       |   |  |              |       |       |       |   |                                                                                                                                                                                                                                                                                                                                                                                                                                                                                 |  |              |              |              |              |              |   |  |  |  |              |              |   |  |  |              |              |              |   |  |              |              |              |              |   |                                                                                                                                                                                                                                                                                                                                                                                                                                                |  |              |              |              |              |              |   |  |  |  |              |        |   |  |  |              |        |              |   |  |              |        |              |        |   |                                                                                                                                                                                                                                                                                                                                                                                                                                                                                 |  |              |              |              |              |              |   |  |  |  |              |              |   |  |  |              |              |              |   |  |              |              |              |              |   |
| pine #2      | <table> <tr><th></th><th><i>K_eas</i></th><th><i>K_wes</i></th><th><i>K_nor</i></th><th><i>K_sou</i></th></tr> <tr><th><i>K_eas</i></th><td>1</td><td></td><td></td><td></td></tr> <tr><th><i>K_wes</i></th><td>0.872</td><td>1</td><td></td><td></td></tr> <tr><th><i>K_nor</i></th><td>0.768</td><td>0.812</td><td>1</td><td></td></tr> <tr><th><i>K_sou</i></th><td>0.802</td><td>0.898</td><td>0.794</td><td>1</td></tr> </table> |              | <i>K_eas</i>  | <i>K_wes</i> | <i>K_nor</i> | <i>K_sou</i> | <i>K_eas</i> | 1 |  |  |  | <i>K_wes</i> | 0.872 | 1 |  |  | <i>K_nor</i> | 0.768 | 0.812 | 1 |  | <i>K_sou</i> | 0.802 | 0.898 | 0.794 | 1 | <table> <tr><th></th><th><i>K_eas</i></th><th><i>K_wes</i></th><th><i>K_nor</i></th><th><i>K_sou</i></th></tr> <tr><th><i>K_eas</i></th><td>1</td><td></td><td></td><td></td></tr> <tr><th><i>K_wes</i></th><td><b>0.822</b></td><td>1</td><td></td><td></td></tr> <tr><th><i>K_nor</i></th><td><b>0.562</b></td><td><b>0.740</b></td><td>1</td><td></td></tr> <tr><th><i>K_sou</i></th><td><b>0.700</b></td><td><b>0.789</b></td><td><b>0.711</b></td><td>1</td></tr> </table> |  | <i>K_eas</i> | <i>K_wes</i> | <i>K_nor</i> | <i>K_sou</i> | <i>K_eas</i> | 1 |  |  |  | <i>K_wes</i> | <b>0.822</b> | 1 |  |  | <i>K_nor</i> | <b>0.562</b> | <b>0.740</b> | 1 |  | <i>K_sou</i> | <b>0.700</b> | <b>0.789</b> | <b>0.711</b> | 1 | <table> <tr><th></th><th><i>K_eas</i></th><th><i>K_wes</i></th><th><i>K_nor</i></th><th><i>K_sou</i></th></tr> <tr><th><i>K_eas</i></th><td>1</td><td></td><td></td><td></td></tr> <tr><th><i>K_wes</i></th><td>0.137</td><td>1</td><td></td><td></td></tr> <tr><th><i>K_nor</i></th><td>0.108</td><td>0.132</td><td>1</td><td></td></tr> <tr><th><i>K_sou</i></th><td>0.040</td><td>0.100</td><td>0.195</td><td>1</td></tr> </table>          |  | <i>K_eas</i> | <i>K_wes</i> | <i>K_nor</i> | <i>K_sou</i> | <i>K_eas</i> | 1 |  |  |  | <i>K_wes</i> | 0.137  | 1 |  |  | <i>K_nor</i> | 0.108  | 0.132        | 1 |  | <i>K_sou</i> | 0.040  | 0.100        | 0.195  | 1 | <table> <tr><th></th><th><i>K_eas</i></th><th><i>K_wes</i></th><th><i>K_nor</i></th><th><i>K_sou</i></th></tr> <tr><th><i>K_eas</i></th><td>1</td><td></td><td></td><td></td></tr> <tr><th><i>K_wes</i></th><td><b>0.287</b></td><td>1</td><td></td><td></td></tr> <tr><th><i>K_nor</i></th><td>0.170</td><td>0.177</td><td>1</td><td></td></tr> <tr><th><i>K_sou</i></th><td><b>0.388</b></td><td><b>0.472</b></td><td><b>0.289</b></td><td>1</td></tr> </table>               |  | <i>K_eas</i> | <i>K_wes</i> | <i>K_nor</i> | <i>K_sou</i> | <i>K_eas</i> | 1 |  |  |  | <i>K_wes</i> | <b>0.287</b> | 1 |  |  | <i>K_nor</i> | 0.170        | 0.177        | 1 |  | <i>K_sou</i> | <b>0.388</b> | <b>0.472</b> | <b>0.289</b> | 1 |
|              | <i>K_eas</i>                                                                                                                                                                                                                                                                                                                                                                                                                          | <i>K_wes</i> | <i>K_nor</i>  | <i>K_sou</i> |              |              |              |   |  |  |  |              |       |   |  |  |              |       |       |   |  |              |       |       |       |   |                                                                                                                                                                                                                                                                                                                                                                                                                                                                                 |  |              |              |              |              |              |   |  |  |  |              |              |   |  |  |              |              |              |   |  |              |              |              |              |   |                                                                                                                                                                                                                                                                                                                                                                                                                                                |  |              |              |              |              |              |   |  |  |  |              |        |   |  |  |              |        |              |   |  |              |        |              |        |   |                                                                                                                                                                                                                                                                                                                                                                                                                                                                                 |  |              |              |              |              |              |   |  |  |  |              |              |   |  |  |              |              |              |   |  |              |              |              |              |   |
| <i>K_eas</i> | 1                                                                                                                                                                                                                                                                                                                                                                                                                                     |              |               |              |              |              |              |   |  |  |  |              |       |   |  |  |              |       |       |   |  |              |       |       |       |   |                                                                                                                                                                                                                                                                                                                                                                                                                                                                                 |  |              |              |              |              |              |   |  |  |  |              |              |   |  |  |              |              |              |   |  |              |              |              |              |   |                                                                                                                                                                                                                                                                                                                                                                                                                                                |  |              |              |              |              |              |   |  |  |  |              |        |   |  |  |              |        |              |   |  |              |        |              |        |   |                                                                                                                                                                                                                                                                                                                                                                                                                                                                                 |  |              |              |              |              |              |   |  |  |  |              |              |   |  |  |              |              |              |   |  |              |              |              |              |   |
| <i>K_wes</i> | 0.872                                                                                                                                                                                                                                                                                                                                                                                                                                 | 1            |               |              |              |              |              |   |  |  |  |              |       |   |  |  |              |       |       |   |  |              |       |       |       |   |                                                                                                                                                                                                                                                                                                                                                                                                                                                                                 |  |              |              |              |              |              |   |  |  |  |              |              |   |  |  |              |              |              |   |  |              |              |              |              |   |                                                                                                                                                                                                                                                                                                                                                                                                                                                |  |              |              |              |              |              |   |  |  |  |              |        |   |  |  |              |        |              |   |  |              |        |              |        |   |                                                                                                                                                                                                                                                                                                                                                                                                                                                                                 |  |              |              |              |              |              |   |  |  |  |              |              |   |  |  |              |              |              |   |  |              |              |              |              |   |
| <i>K_nor</i> | 0.768                                                                                                                                                                                                                                                                                                                                                                                                                                 | 0.812        | 1             |              |              |              |              |   |  |  |  |              |       |   |  |  |              |       |       |   |  |              |       |       |       |   |                                                                                                                                                                                                                                                                                                                                                                                                                                                                                 |  |              |              |              |              |              |   |  |  |  |              |              |   |  |  |              |              |              |   |  |              |              |              |              |   |                                                                                                                                                                                                                                                                                                                                                                                                                                                |  |              |              |              |              |              |   |  |  |  |              |        |   |  |  |              |        |              |   |  |              |        |              |        |   |                                                                                                                                                                                                                                                                                                                                                                                                                                                                                 |  |              |              |              |              |              |   |  |  |  |              |              |   |  |  |              |              |              |   |  |              |              |              |              |   |
| <i>K_sou</i> | 0.802                                                                                                                                                                                                                                                                                                                                                                                                                                 | 0.898        | 0.794         | 1            |              |              |              |   |  |  |  |              |       |   |  |  |              |       |       |   |  |              |       |       |       |   |                                                                                                                                                                                                                                                                                                                                                                                                                                                                                 |  |              |              |              |              |              |   |  |  |  |              |              |   |  |  |              |              |              |   |  |              |              |              |              |   |                                                                                                                                                                                                                                                                                                                                                                                                                                                |  |              |              |              |              |              |   |  |  |  |              |        |   |  |  |              |        |              |   |  |              |        |              |        |   |                                                                                                                                                                                                                                                                                                                                                                                                                                                                                 |  |              |              |              |              |              |   |  |  |  |              |              |   |  |  |              |              |              |   |  |              |              |              |              |   |
|              | <i>K_eas</i>                                                                                                                                                                                                                                                                                                                                                                                                                          | <i>K_wes</i> | <i>K_nor</i>  | <i>K_sou</i> |              |              |              |   |  |  |  |              |       |   |  |  |              |       |       |   |  |              |       |       |       |   |                                                                                                                                                                                                                                                                                                                                                                                                                                                                                 |  |              |              |              |              |              |   |  |  |  |              |              |   |  |  |              |              |              |   |  |              |              |              |              |   |                                                                                                                                                                                                                                                                                                                                                                                                                                                |  |              |              |              |              |              |   |  |  |  |              |        |   |  |  |              |        |              |   |  |              |        |              |        |   |                                                                                                                                                                                                                                                                                                                                                                                                                                                                                 |  |              |              |              |              |              |   |  |  |  |              |              |   |  |  |              |              |              |   |  |              |              |              |              |   |
| <i>K_eas</i> | 1                                                                                                                                                                                                                                                                                                                                                                                                                                     |              |               |              |              |              |              |   |  |  |  |              |       |   |  |  |              |       |       |   |  |              |       |       |       |   |                                                                                                                                                                                                                                                                                                                                                                                                                                                                                 |  |              |              |              |              |              |   |  |  |  |              |              |   |  |  |              |              |              |   |  |              |              |              |              |   |                                                                                                                                                                                                                                                                                                                                                                                                                                                |  |              |              |              |              |              |   |  |  |  |              |        |   |  |  |              |        |              |   |  |              |        |              |        |   |                                                                                                                                                                                                                                                                                                                                                                                                                                                                                 |  |              |              |              |              |              |   |  |  |  |              |              |   |  |  |              |              |              |   |  |              |              |              |              |   |
| <i>K_wes</i> | <b>0.822</b>                                                                                                                                                                                                                                                                                                                                                                                                                          | 1            |               |              |              |              |              |   |  |  |  |              |       |   |  |  |              |       |       |   |  |              |       |       |       |   |                                                                                                                                                                                                                                                                                                                                                                                                                                                                                 |  |              |              |              |              |              |   |  |  |  |              |              |   |  |  |              |              |              |   |  |              |              |              |              |   |                                                                                                                                                                                                                                                                                                                                                                                                                                                |  |              |              |              |              |              |   |  |  |  |              |        |   |  |  |              |        |              |   |  |              |        |              |        |   |                                                                                                                                                                                                                                                                                                                                                                                                                                                                                 |  |              |              |              |              |              |   |  |  |  |              |              |   |  |  |              |              |              |   |  |              |              |              |              |   |
| <i>K_nor</i> | <b>0.562</b>                                                                                                                                                                                                                                                                                                                                                                                                                          | <b>0.740</b> | 1             |              |              |              |              |   |  |  |  |              |       |   |  |  |              |       |       |   |  |              |       |       |       |   |                                                                                                                                                                                                                                                                                                                                                                                                                                                                                 |  |              |              |              |              |              |   |  |  |  |              |              |   |  |  |              |              |              |   |  |              |              |              |              |   |                                                                                                                                                                                                                                                                                                                                                                                                                                                |  |              |              |              |              |              |   |  |  |  |              |        |   |  |  |              |        |              |   |  |              |        |              |        |   |                                                                                                                                                                                                                                                                                                                                                                                                                                                                                 |  |              |              |              |              |              |   |  |  |  |              |              |   |  |  |              |              |              |   |  |              |              |              |              |   |
| <i>K_sou</i> | <b>0.700</b>                                                                                                                                                                                                                                                                                                                                                                                                                          | <b>0.789</b> | <b>0.711</b>  | 1            |              |              |              |   |  |  |  |              |       |   |  |  |              |       |       |   |  |              |       |       |       |   |                                                                                                                                                                                                                                                                                                                                                                                                                                                                                 |  |              |              |              |              |              |   |  |  |  |              |              |   |  |  |              |              |              |   |  |              |              |              |              |   |                                                                                                                                                                                                                                                                                                                                                                                                                                                |  |              |              |              |              |              |   |  |  |  |              |        |   |  |  |              |        |              |   |  |              |        |              |        |   |                                                                                                                                                                                                                                                                                                                                                                                                                                                                                 |  |              |              |              |              |              |   |  |  |  |              |              |   |  |  |              |              |              |   |  |              |              |              |              |   |
|              | <i>K_eas</i>                                                                                                                                                                                                                                                                                                                                                                                                                          | <i>K_wes</i> | <i>K_nor</i>  | <i>K_sou</i> |              |              |              |   |  |  |  |              |       |   |  |  |              |       |       |   |  |              |       |       |       |   |                                                                                                                                                                                                                                                                                                                                                                                                                                                                                 |  |              |              |              |              |              |   |  |  |  |              |              |   |  |  |              |              |              |   |  |              |              |              |              |   |                                                                                                                                                                                                                                                                                                                                                                                                                                                |  |              |              |              |              |              |   |  |  |  |              |        |   |  |  |              |        |              |   |  |              |        |              |        |   |                                                                                                                                                                                                                                                                                                                                                                                                                                                                                 |  |              |              |              |              |              |   |  |  |  |              |              |   |  |  |              |              |              |   |  |              |              |              |              |   |
| <i>K_eas</i> | 1                                                                                                                                                                                                                                                                                                                                                                                                                                     |              |               |              |              |              |              |   |  |  |  |              |       |   |  |  |              |       |       |   |  |              |       |       |       |   |                                                                                                                                                                                                                                                                                                                                                                                                                                                                                 |  |              |              |              |              |              |   |  |  |  |              |              |   |  |  |              |              |              |   |  |              |              |              |              |   |                                                                                                                                                                                                                                                                                                                                                                                                                                                |  |              |              |              |              |              |   |  |  |  |              |        |   |  |  |              |        |              |   |  |              |        |              |        |   |                                                                                                                                                                                                                                                                                                                                                                                                                                                                                 |  |              |              |              |              |              |   |  |  |  |              |              |   |  |  |              |              |              |   |  |              |              |              |              |   |
| <i>K_wes</i> | 0.137                                                                                                                                                                                                                                                                                                                                                                                                                                 | 1            |               |              |              |              |              |   |  |  |  |              |       |   |  |  |              |       |       |   |  |              |       |       |       |   |                                                                                                                                                                                                                                                                                                                                                                                                                                                                                 |  |              |              |              |              |              |   |  |  |  |              |              |   |  |  |              |              |              |   |  |              |              |              |              |   |                                                                                                                                                                                                                                                                                                                                                                                                                                                |  |              |              |              |              |              |   |  |  |  |              |        |   |  |  |              |        |              |   |  |              |        |              |        |   |                                                                                                                                                                                                                                                                                                                                                                                                                                                                                 |  |              |              |              |              |              |   |  |  |  |              |              |   |  |  |              |              |              |   |  |              |              |              |              |   |
| <i>K_nor</i> | 0.108                                                                                                                                                                                                                                                                                                                                                                                                                                 | 0.132        | 1             |              |              |              |              |   |  |  |  |              |       |   |  |  |              |       |       |   |  |              |       |       |       |   |                                                                                                                                                                                                                                                                                                                                                                                                                                                                                 |  |              |              |              |              |              |   |  |  |  |              |              |   |  |  |              |              |              |   |  |              |              |              |              |   |                                                                                                                                                                                                                                                                                                                                                                                                                                                |  |              |              |              |              |              |   |  |  |  |              |        |   |  |  |              |        |              |   |  |              |        |              |        |   |                                                                                                                                                                                                                                                                                                                                                                                                                                                                                 |  |              |              |              |              |              |   |  |  |  |              |              |   |  |  |              |              |              |   |  |              |              |              |              |   |
| <i>K_sou</i> | 0.040                                                                                                                                                                                                                                                                                                                                                                                                                                 | 0.100        | 0.195         | 1            |              |              |              |   |  |  |  |              |       |   |  |  |              |       |       |   |  |              |       |       |       |   |                                                                                                                                                                                                                                                                                                                                                                                                                                                                                 |  |              |              |              |              |              |   |  |  |  |              |              |   |  |  |              |              |              |   |  |              |              |              |              |   |                                                                                                                                                                                                                                                                                                                                                                                                                                                |  |              |              |              |              |              |   |  |  |  |              |        |   |  |  |              |        |              |   |  |              |        |              |        |   |                                                                                                                                                                                                                                                                                                                                                                                                                                                                                 |  |              |              |              |              |              |   |  |  |  |              |              |   |  |  |              |              |              |   |  |              |              |              |              |   |
|              | <i>K_eas</i>                                                                                                                                                                                                                                                                                                                                                                                                                          | <i>K_wes</i> | <i>K_nor</i>  | <i>K_sou</i> |              |              |              |   |  |  |  |              |       |   |  |  |              |       |       |   |  |              |       |       |       |   |                                                                                                                                                                                                                                                                                                                                                                                                                                                                                 |  |              |              |              |              |              |   |  |  |  |              |              |   |  |  |              |              |              |   |  |              |              |              |              |   |                                                                                                                                                                                                                                                                                                                                                                                                                                                |  |              |              |              |              |              |   |  |  |  |              |        |   |  |  |              |        |              |   |  |              |        |              |        |   |                                                                                                                                                                                                                                                                                                                                                                                                                                                                                 |  |              |              |              |              |              |   |  |  |  |              |              |   |  |  |              |              |              |   |  |              |              |              |              |   |
| <i>K_eas</i> | 1                                                                                                                                                                                                                                                                                                                                                                                                                                     |              |               |              |              |              |              |   |  |  |  |              |       |   |  |  |              |       |       |   |  |              |       |       |       |   |                                                                                                                                                                                                                                                                                                                                                                                                                                                                                 |  |              |              |              |              |              |   |  |  |  |              |              |   |  |  |              |              |              |   |  |              |              |              |              |   |                                                                                                                                                                                                                                                                                                                                                                                                                                                |  |              |              |              |              |              |   |  |  |  |              |        |   |  |  |              |        |              |   |  |              |        |              |        |   |                                                                                                                                                                                                                                                                                                                                                                                                                                                                                 |  |              |              |              |              |              |   |  |  |  |              |              |   |  |  |              |              |              |   |  |              |              |              |              |   |
| <i>K_wes</i> | <b>0.287</b>                                                                                                                                                                                                                                                                                                                                                                                                                          | 1            |               |              |              |              |              |   |  |  |  |              |       |   |  |  |              |       |       |   |  |              |       |       |       |   |                                                                                                                                                                                                                                                                                                                                                                                                                                                                                 |  |              |              |              |              |              |   |  |  |  |              |              |   |  |  |              |              |              |   |  |              |              |              |              |   |                                                                                                                                                                                                                                                                                                                                                                                                                                                |  |              |              |              |              |              |   |  |  |  |              |        |   |  |  |              |        |              |   |  |              |        |              |        |   |                                                                                                                                                                                                                                                                                                                                                                                                                                                                                 |  |              |              |              |              |              |   |  |  |  |              |              |   |  |  |              |              |              |   |  |              |              |              |              |   |
| <i>K_nor</i> | 0.170                                                                                                                                                                                                                                                                                                                                                                                                                                 | 0.177        | 1             |              |              |              |              |   |  |  |  |              |       |   |  |  |              |       |       |   |  |              |       |       |       |   |                                                                                                                                                                                                                                                                                                                                                                                                                                                                                 |  |              |              |              |              |              |   |  |  |  |              |              |   |  |  |              |              |              |   |  |              |              |              |              |   |                                                                                                                                                                                                                                                                                                                                                                                                                                                |  |              |              |              |              |              |   |  |  |  |              |        |   |  |  |              |        |              |   |  |              |        |              |        |   |                                                                                                                                                                                                                                                                                                                                                                                                                                                                                 |  |              |              |              |              |              |   |  |  |  |              |              |   |  |  |              |              |              |   |  |              |              |              |              |   |
| <i>K_sou</i> | <b>0.388</b>                                                                                                                                                                                                                                                                                                                                                                                                                          | <b>0.472</b> | <b>0.289</b>  | 1            |              |              |              |   |  |  |  |              |       |   |  |  |              |       |       |   |  |              |       |       |       |   |                                                                                                                                                                                                                                                                                                                                                                                                                                                                                 |  |              |              |              |              |              |   |  |  |  |              |              |   |  |  |              |              |              |   |  |              |              |              |              |   |                                                                                                                                                                                                                                                                                                                                                                                                                                                |  |              |              |              |              |              |   |  |  |  |              |        |   |  |  |              |        |              |   |  |              |        |              |        |   |                                                                                                                                                                                                                                                                                                                                                                                                                                                                                 |  |              |              |              |              |              |   |  |  |  |              |              |   |  |  |              |              |              |   |  |              |              |              |              |   |
| pine #3      | <table> <tr><th></th><th><i>K_eas</i></th><th><i>K_wes</i></th><th><i>K_nor</i></th><th><i>K_sou</i></th></tr> <tr><th><i>K_eas</i></th><td>1</td><td></td><td></td><td></td></tr> <tr><th><i>K_wes</i></th><td>0.779</td><td>1</td><td></td><td></td></tr> <tr><th><i>K_nor</i></th><td>0.832</td><td>0.924</td><td>1</td><td></td></tr> <tr><th><i>K_sou</i></th><td>0.560</td><td>0.678</td><td>0.624</td><td>1</td></tr> </table> |              | <i>K_eas</i>  | <i>K_wes</i> | <i>K_nor</i> | <i>K_sou</i> | <i>K_eas</i> | 1 |  |  |  | <i>K_wes</i> | 0.779 | 1 |  |  | <i>K_nor</i> | 0.832 | 0.924 | 1 |  | <i>K_sou</i> | 0.560 | 0.678 | 0.624 | 1 | <table> <tr><th></th><th><i>K_eas</i></th><th><i>K_wes</i></th><th><i>K_nor</i></th><th><i>K_sou</i></th></tr> <tr><th><i>K_eas</i></th><td>1</td><td></td><td></td><td></td></tr> <tr><th><i>K_wes</i></th><td><b>0.512</b></td><td>1</td><td></td><td></td></tr> <tr><th><i>K_nor</i></th><td><b>0.672</b></td><td><b>0.858</b></td><td>1</td><td></td></tr> <tr><th><i>K_sou</i></th><td>0.049</td><td><b>0.345</b></td><td><b>0.293</b></td><td>1</td></tr> </table>        |  | <i>K_eas</i> | <i>K_wes</i> | <i>K_nor</i> | <i>K_sou</i> | <i>K_eas</i> | 1 |  |  |  | <i>K_wes</i> | <b>0.512</b> | 1 |  |  | <i>K_nor</i> | <b>0.672</b> | <b>0.858</b> | 1 |  | <i>K_sou</i> | 0.049        | <b>0.345</b> | <b>0.293</b> | 1 | <table> <tr><th></th><th><i>K_eas</i></th><th><i>K_wes</i></th><th><i>K_nor</i></th><th><i>K_sou</i></th></tr> <tr><th><i>K_eas</i></th><td>1</td><td></td><td></td><td></td></tr> <tr><th><i>K_wes</i></th><td>0.051</td><td>1</td><td></td><td></td></tr> <tr><th><i>K_nor</i></th><td>-0.044</td><td><b>0.295</b></td><td>1</td><td></td></tr> <tr><th><i>K_sou</i></th><td>0.246</td><td>0.057</td><td>0.124</td><td>1</td></tr> </table>  |  | <i>K_eas</i> | <i>K_wes</i> | <i>K_nor</i> | <i>K_sou</i> | <i>K_eas</i> | 1 |  |  |  | <i>K_wes</i> | 0.051  | 1 |  |  | <i>K_nor</i> | -0.044 | <b>0.295</b> | 1 |  | <i>K_sou</i> | 0.246  | 0.057        | 0.124  | 1 | <table> <tr><th></th><th><i>K_eas</i></th><th><i>K_wes</i></th><th><i>K_nor</i></th><th><i>K_sou</i></th></tr> <tr><th><i>K_eas</i></th><td>1</td><td></td><td></td><td></td></tr> <tr><th><i>K_wes</i></th><td><b>0.392</b></td><td>1</td><td></td><td></td></tr> <tr><th><i>K_nor</i></th><td><b>0.382</b></td><td><b>0.585</b></td><td>1</td><td></td></tr> <tr><th><i>K_sou</i></th><td><b>0.385</b></td><td><b>0.320</b></td><td><b>0.355</b></td><td>1</td></tr> </table> |  | <i>K_eas</i> | <i>K_wes</i> | <i>K_nor</i> | <i>K_sou</i> | <i>K_eas</i> | 1 |  |  |  | <i>K_wes</i> | <b>0.392</b> | 1 |  |  | <i>K_nor</i> | <b>0.382</b> | <b>0.585</b> | 1 |  | <i>K_sou</i> | <b>0.385</b> | <b>0.320</b> | <b>0.355</b> | 1 |
|              | <i>K_eas</i>                                                                                                                                                                                                                                                                                                                                                                                                                          | <i>K_wes</i> | <i>K_nor</i>  | <i>K_sou</i> |              |              |              |   |  |  |  |              |       |   |  |  |              |       |       |   |  |              |       |       |       |   |                                                                                                                                                                                                                                                                                                                                                                                                                                                                                 |  |              |              |              |              |              |   |  |  |  |              |              |   |  |  |              |              |              |   |  |              |              |              |              |   |                                                                                                                                                                                                                                                                                                                                                                                                                                                |  |              |              |              |              |              |   |  |  |  |              |        |   |  |  |              |        |              |   |  |              |        |              |        |   |                                                                                                                                                                                                                                                                                                                                                                                                                                                                                 |  |              |              |              |              |              |   |  |  |  |              |              |   |  |  |              |              |              |   |  |              |              |              |              |   |
| <i>K_eas</i> | 1                                                                                                                                                                                                                                                                                                                                                                                                                                     |              |               |              |              |              |              |   |  |  |  |              |       |   |  |  |              |       |       |   |  |              |       |       |       |   |                                                                                                                                                                                                                                                                                                                                                                                                                                                                                 |  |              |              |              |              |              |   |  |  |  |              |              |   |  |  |              |              |              |   |  |              |              |              |              |   |                                                                                                                                                                                                                                                                                                                                                                                                                                                |  |              |              |              |              |              |   |  |  |  |              |        |   |  |  |              |        |              |   |  |              |        |              |        |   |                                                                                                                                                                                                                                                                                                                                                                                                                                                                                 |  |              |              |              |              |              |   |  |  |  |              |              |   |  |  |              |              |              |   |  |              |              |              |              |   |
| <i>K_wes</i> | 0.779                                                                                                                                                                                                                                                                                                                                                                                                                                 | 1            |               |              |              |              |              |   |  |  |  |              |       |   |  |  |              |       |       |   |  |              |       |       |       |   |                                                                                                                                                                                                                                                                                                                                                                                                                                                                                 |  |              |              |              |              |              |   |  |  |  |              |              |   |  |  |              |              |              |   |  |              |              |              |              |   |                                                                                                                                                                                                                                                                                                                                                                                                                                                |  |              |              |              |              |              |   |  |  |  |              |        |   |  |  |              |        |              |   |  |              |        |              |        |   |                                                                                                                                                                                                                                                                                                                                                                                                                                                                                 |  |              |              |              |              |              |   |  |  |  |              |              |   |  |  |              |              |              |   |  |              |              |              |              |   |
| <i>K_nor</i> | 0.832                                                                                                                                                                                                                                                                                                                                                                                                                                 | 0.924        | 1             |              |              |              |              |   |  |  |  |              |       |   |  |  |              |       |       |   |  |              |       |       |       |   |                                                                                                                                                                                                                                                                                                                                                                                                                                                                                 |  |              |              |              |              |              |   |  |  |  |              |              |   |  |  |              |              |              |   |  |              |              |              |              |   |                                                                                                                                                                                                                                                                                                                                                                                                                                                |  |              |              |              |              |              |   |  |  |  |              |        |   |  |  |              |        |              |   |  |              |        |              |        |   |                                                                                                                                                                                                                                                                                                                                                                                                                                                                                 |  |              |              |              |              |              |   |  |  |  |              |              |   |  |  |              |              |              |   |  |              |              |              |              |   |
| <i>K_sou</i> | 0.560                                                                                                                                                                                                                                                                                                                                                                                                                                 | 0.678        | 0.624         | 1            |              |              |              |   |  |  |  |              |       |   |  |  |              |       |       |   |  |              |       |       |       |   |                                                                                                                                                                                                                                                                                                                                                                                                                                                                                 |  |              |              |              |              |              |   |  |  |  |              |              |   |  |  |              |              |              |   |  |              |              |              |              |   |                                                                                                                                                                                                                                                                                                                                                                                                                                                |  |              |              |              |              |              |   |  |  |  |              |        |   |  |  |              |        |              |   |  |              |        |              |        |   |                                                                                                                                                                                                                                                                                                                                                                                                                                                                                 |  |              |              |              |              |              |   |  |  |  |              |              |   |  |  |              |              |              |   |  |              |              |              |              |   |
|              | <i>K_eas</i>                                                                                                                                                                                                                                                                                                                                                                                                                          | <i>K_wes</i> | <i>K_nor</i>  | <i>K_sou</i> |              |              |              |   |  |  |  |              |       |   |  |  |              |       |       |   |  |              |       |       |       |   |                                                                                                                                                                                                                                                                                                                                                                                                                                                                                 |  |              |              |              |              |              |   |  |  |  |              |              |   |  |  |              |              |              |   |  |              |              |              |              |   |                                                                                                                                                                                                                                                                                                                                                                                                                                                |  |              |              |              |              |              |   |  |  |  |              |        |   |  |  |              |        |              |   |  |              |        |              |        |   |                                                                                                                                                                                                                                                                                                                                                                                                                                                                                 |  |              |              |              |              |              |   |  |  |  |              |              |   |  |  |              |              |              |   |  |              |              |              |              |   |
| <i>K_eas</i> | 1                                                                                                                                                                                                                                                                                                                                                                                                                                     |              |               |              |              |              |              |   |  |  |  |              |       |   |  |  |              |       |       |   |  |              |       |       |       |   |                                                                                                                                                                                                                                                                                                                                                                                                                                                                                 |  |              |              |              |              |              |   |  |  |  |              |              |   |  |  |              |              |              |   |  |              |              |              |              |   |                                                                                                                                                                                                                                                                                                                                                                                                                                                |  |              |              |              |              |              |   |  |  |  |              |        |   |  |  |              |        |              |   |  |              |        |              |        |   |                                                                                                                                                                                                                                                                                                                                                                                                                                                                                 |  |              |              |              |              |              |   |  |  |  |              |              |   |  |  |              |              |              |   |  |              |              |              |              |   |
| <i>K_wes</i> | <b>0.512</b>                                                                                                                                                                                                                                                                                                                                                                                                                          | 1            |               |              |              |              |              |   |  |  |  |              |       |   |  |  |              |       |       |   |  |              |       |       |       |   |                                                                                                                                                                                                                                                                                                                                                                                                                                                                                 |  |              |              |              |              |              |   |  |  |  |              |              |   |  |  |              |              |              |   |  |              |              |              |              |   |                                                                                                                                                                                                                                                                                                                                                                                                                                                |  |              |              |              |              |              |   |  |  |  |              |        |   |  |  |              |        |              |   |  |              |        |              |        |   |                                                                                                                                                                                                                                                                                                                                                                                                                                                                                 |  |              |              |              |              |              |   |  |  |  |              |              |   |  |  |              |              |              |   |  |              |              |              |              |   |
| <i>K_nor</i> | <b>0.672</b>                                                                                                                                                                                                                                                                                                                                                                                                                          | <b>0.858</b> | 1             |              |              |              |              |   |  |  |  |              |       |   |  |  |              |       |       |   |  |              |       |       |       |   |                                                                                                                                                                                                                                                                                                                                                                                                                                                                                 |  |              |              |              |              |              |   |  |  |  |              |              |   |  |  |              |              |              |   |  |              |              |              |              |   |                                                                                                                                                                                                                                                                                                                                                                                                                                                |  |              |              |              |              |              |   |  |  |  |              |        |   |  |  |              |        |              |   |  |              |        |              |        |   |                                                                                                                                                                                                                                                                                                                                                                                                                                                                                 |  |              |              |              |              |              |   |  |  |  |              |              |   |  |  |              |              |              |   |  |              |              |              |              |   |
| <i>K_sou</i> | 0.049                                                                                                                                                                                                                                                                                                                                                                                                                                 | <b>0.345</b> | <b>0.293</b>  | 1            |              |              |              |   |  |  |  |              |       |   |  |  |              |       |       |   |  |              |       |       |       |   |                                                                                                                                                                                                                                                                                                                                                                                                                                                                                 |  |              |              |              |              |              |   |  |  |  |              |              |   |  |  |              |              |              |   |  |              |              |              |              |   |                                                                                                                                                                                                                                                                                                                                                                                                                                                |  |              |              |              |              |              |   |  |  |  |              |        |   |  |  |              |        |              |   |  |              |        |              |        |   |                                                                                                                                                                                                                                                                                                                                                                                                                                                                                 |  |              |              |              |              |              |   |  |  |  |              |              |   |  |  |              |              |              |   |  |              |              |              |              |   |
|              | <i>K_eas</i>                                                                                                                                                                                                                                                                                                                                                                                                                          | <i>K_wes</i> | <i>K_nor</i>  | <i>K_sou</i> |              |              |              |   |  |  |  |              |       |   |  |  |              |       |       |   |  |              |       |       |       |   |                                                                                                                                                                                                                                                                                                                                                                                                                                                                                 |  |              |              |              |              |              |   |  |  |  |              |              |   |  |  |              |              |              |   |  |              |              |              |              |   |                                                                                                                                                                                                                                                                                                                                                                                                                                                |  |              |              |              |              |              |   |  |  |  |              |        |   |  |  |              |        |              |   |  |              |        |              |        |   |                                                                                                                                                                                                                                                                                                                                                                                                                                                                                 |  |              |              |              |              |              |   |  |  |  |              |              |   |  |  |              |              |              |   |  |              |              |              |              |   |
| <i>K_eas</i> | 1                                                                                                                                                                                                                                                                                                                                                                                                                                     |              |               |              |              |              |              |   |  |  |  |              |       |   |  |  |              |       |       |   |  |              |       |       |       |   |                                                                                                                                                                                                                                                                                                                                                                                                                                                                                 |  |              |              |              |              |              |   |  |  |  |              |              |   |  |  |              |              |              |   |  |              |              |              |              |   |                                                                                                                                                                                                                                                                                                                                                                                                                                                |  |              |              |              |              |              |   |  |  |  |              |        |   |  |  |              |        |              |   |  |              |        |              |        |   |                                                                                                                                                                                                                                                                                                                                                                                                                                                                                 |  |              |              |              |              |              |   |  |  |  |              |              |   |  |  |              |              |              |   |  |              |              |              |              |   |
| <i>K_wes</i> | 0.051                                                                                                                                                                                                                                                                                                                                                                                                                                 | 1            |               |              |              |              |              |   |  |  |  |              |       |   |  |  |              |       |       |   |  |              |       |       |       |   |                                                                                                                                                                                                                                                                                                                                                                                                                                                                                 |  |              |              |              |              |              |   |  |  |  |              |              |   |  |  |              |              |              |   |  |              |              |              |              |   |                                                                                                                                                                                                                                                                                                                                                                                                                                                |  |              |              |              |              |              |   |  |  |  |              |        |   |  |  |              |        |              |   |  |              |        |              |        |   |                                                                                                                                                                                                                                                                                                                                                                                                                                                                                 |  |              |              |              |              |              |   |  |  |  |              |              |   |  |  |              |              |              |   |  |              |              |              |              |   |
| <i>K_nor</i> | -0.044                                                                                                                                                                                                                                                                                                                                                                                                                                | <b>0.295</b> | 1             |              |              |              |              |   |  |  |  |              |       |   |  |  |              |       |       |   |  |              |       |       |       |   |                                                                                                                                                                                                                                                                                                                                                                                                                                                                                 |  |              |              |              |              |              |   |  |  |  |              |              |   |  |  |              |              |              |   |  |              |              |              |              |   |                                                                                                                                                                                                                                                                                                                                                                                                                                                |  |              |              |              |              |              |   |  |  |  |              |        |   |  |  |              |        |              |   |  |              |        |              |        |   |                                                                                                                                                                                                                                                                                                                                                                                                                                                                                 |  |              |              |              |              |              |   |  |  |  |              |              |   |  |  |              |              |              |   |  |              |              |              |              |   |
| <i>K_sou</i> | 0.246                                                                                                                                                                                                                                                                                                                                                                                                                                 | 0.057        | 0.124         | 1            |              |              |              |   |  |  |  |              |       |   |  |  |              |       |       |   |  |              |       |       |       |   |                                                                                                                                                                                                                                                                                                                                                                                                                                                                                 |  |              |              |              |              |              |   |  |  |  |              |              |   |  |  |              |              |              |   |  |              |              |              |              |   |                                                                                                                                                                                                                                                                                                                                                                                                                                                |  |              |              |              |              |              |   |  |  |  |              |        |   |  |  |              |        |              |   |  |              |        |              |        |   |                                                                                                                                                                                                                                                                                                                                                                                                                                                                                 |  |              |              |              |              |              |   |  |  |  |              |              |   |  |  |              |              |              |   |  |              |              |              |              |   |
|              | <i>K_eas</i>                                                                                                                                                                                                                                                                                                                                                                                                                          | <i>K_wes</i> | <i>K_nor</i>  | <i>K_sou</i> |              |              |              |   |  |  |  |              |       |   |  |  |              |       |       |   |  |              |       |       |       |   |                                                                                                                                                                                                                                                                                                                                                                                                                                                                                 |  |              |              |              |              |              |   |  |  |  |              |              |   |  |  |              |              |              |   |  |              |              |              |              |   |                                                                                                                                                                                                                                                                                                                                                                                                                                                |  |              |              |              |              |              |   |  |  |  |              |        |   |  |  |              |        |              |   |  |              |        |              |        |   |                                                                                                                                                                                                                                                                                                                                                                                                                                                                                 |  |              |              |              |              |              |   |  |  |  |              |              |   |  |  |              |              |              |   |  |              |              |              |              |   |
| <i>K_eas</i> | 1                                                                                                                                                                                                                                                                                                                                                                                                                                     |              |               |              |              |              |              |   |  |  |  |              |       |   |  |  |              |       |       |   |  |              |       |       |       |   |                                                                                                                                                                                                                                                                                                                                                                                                                                                                                 |  |              |              |              |              |              |   |  |  |  |              |              |   |  |  |              |              |              |   |  |              |              |              |              |   |                                                                                                                                                                                                                                                                                                                                                                                                                                                |  |              |              |              |              |              |   |  |  |  |              |        |   |  |  |              |        |              |   |  |              |        |              |        |   |                                                                                                                                                                                                                                                                                                                                                                                                                                                                                 |  |              |              |              |              |              |   |  |  |  |              |              |   |  |  |              |              |              |   |  |              |              |              |              |   |
| <i>K_wes</i> | <b>0.392</b>                                                                                                                                                                                                                                                                                                                                                                                                                          | 1            |               |              |              |              |              |   |  |  |  |              |       |   |  |  |              |       |       |   |  |              |       |       |       |   |                                                                                                                                                                                                                                                                                                                                                                                                                                                                                 |  |              |              |              |              |              |   |  |  |  |              |              |   |  |  |              |              |              |   |  |              |              |              |              |   |                                                                                                                                                                                                                                                                                                                                                                                                                                                |  |              |              |              |              |              |   |  |  |  |              |        |   |  |  |              |        |              |   |  |              |        |              |        |   |                                                                                                                                                                                                                                                                                                                                                                                                                                                                                 |  |              |              |              |              |              |   |  |  |  |              |              |   |  |  |              |              |              |   |  |              |              |              |              |   |
| <i>K_nor</i> | <b>0.382</b>                                                                                                                                                                                                                                                                                                                                                                                                                          | <b>0.585</b> | 1             |              |              |              |              |   |  |  |  |              |       |   |  |  |              |       |       |   |  |              |       |       |       |   |                                                                                                                                                                                                                                                                                                                                                                                                                                                                                 |  |              |              |              |              |              |   |  |  |  |              |              |   |  |  |              |              |              |   |  |              |              |              |              |   |                                                                                                                                                                                                                                                                                                                                                                                                                                                |  |              |              |              |              |              |   |  |  |  |              |        |   |  |  |              |        |              |   |  |              |        |              |        |   |                                                                                                                                                                                                                                                                                                                                                                                                                                                                                 |  |              |              |              |              |              |   |  |  |  |              |              |   |  |  |              |              |              |   |  |              |              |              |              |   |
| <i>K_sou</i> | <b>0.385</b>                                                                                                                                                                                                                                                                                                                                                                                                                          | <b>0.320</b> | <b>0.355</b>  | 1            |              |              |              |   |  |  |  |              |       |   |  |  |              |       |       |   |  |              |       |       |       |   |                                                                                                                                                                                                                                                                                                                                                                                                                                                                                 |  |              |              |              |              |              |   |  |  |  |              |              |   |  |  |              |              |              |   |  |              |              |              |              |   |                                                                                                                                                                                                                                                                                                                                                                                                                                                |  |              |              |              |              |              |   |  |  |  |              |        |   |  |  |              |        |              |   |  |              |        |              |        |   |                                                                                                                                                                                                                                                                                                                                                                                                                                                                                 |  |              |              |              |              |              |   |  |  |  |              |              |   |  |  |              |              |              |   |  |              |              |              |              |   |
| pine #4      | <table> <tr><th></th><th><i>K_eas</i></th><th><i>K_wes</i></th><th><i>K_nor</i></th><th><i>K_sou</i></th></tr> <tr><th><i>K_eas</i></th><td>1</td><td></td><td></td><td></td></tr> <tr><th><i>K_wes</i></th><td>0.321</td><td>1</td><td></td><td></td></tr> <tr><th><i>K_nor</i></th><td>0.786</td><td>0.432</td><td>1</td><td></td></tr> <tr><th><i>K_sou</i></th><td>0.781</td><td>0.373</td><td>0.933</td><td>1</td></tr> </table> |              | <i>K_eas</i>  | <i>K_wes</i> | <i>K_nor</i> | <i>K_sou</i> | <i>K_eas</i> | 1 |  |  |  | <i>K_wes</i> | 0.321 | 1 |  |  | <i>K_nor</i> | 0.786 | 0.432 | 1 |  | <i>K_sou</i> | 0.781 | 0.373 | 0.933 | 1 | <table> <tr><th></th><th><i>K_eas</i></th><th><i>K_wes</i></th><th><i>K_nor</i></th><th><i>K_sou</i></th></tr> <tr><th><i>K_eas</i></th><td>1</td><td></td><td></td><td></td></tr> <tr><th><i>K_wes</i></th><td>0.212</td><td>1</td><td></td><td></td></tr> <tr><th><i>K_nor</i></th><td>0.186</td><td>0.095</td><td>1</td><td></td></tr> <tr><th><i>K_sou</i></th><td>0.179</td><td>-0.102</td><td><b>0.637</b></td><td>1</td></tr> </table>                                   |  | <i>K_eas</i> | <i>K_wes</i> | <i>K_nor</i> | <i>K_sou</i> | <i>K_eas</i> | 1 |  |  |  | <i>K_wes</i> | 0.212        | 1 |  |  | <i>K_nor</i> | 0.186        | 0.095        | 1 |  | <i>K_sou</i> | 0.179        | -0.102       | <b>0.637</b> | 1 | <table> <tr><th></th><th><i>K_eas</i></th><th><i>K_wes</i></th><th><i>K_nor</i></th><th><i>K_sou</i></th></tr> <tr><th><i>K_eas</i></th><td>1</td><td></td><td></td><td></td></tr> <tr><th><i>K_wes</i></th><td>-0.052</td><td>1</td><td></td><td></td></tr> <tr><th><i>K_nor</i></th><td>0.140</td><td>0.094</td><td>1</td><td></td></tr> <tr><th><i>K_sou</i></th><td>0.088</td><td>-0.103</td><td>0.041</td><td>1</td></tr> </table>        |  | <i>K_eas</i> | <i>K_wes</i> | <i>K_nor</i> | <i>K_sou</i> | <i>K_eas</i> | 1 |  |  |  | <i>K_wes</i> | -0.052 | 1 |  |  | <i>K_nor</i> | 0.140  | 0.094        | 1 |  | <i>K_sou</i> | 0.088  | -0.103       | 0.041  | 1 | <table> <tr><th></th><th><i>K_eas</i></th><th><i>K_wes</i></th><th><i>K_nor</i></th><th><i>K_sou</i></th></tr> <tr><th><i>K_eas</i></th><td>1</td><td></td><td></td><td></td></tr> <tr><th><i>K_wes</i></th><td>0.166</td><td>1</td><td></td><td></td></tr> <tr><th><i>K_nor</i></th><td>0.029</td><td><b>0.428</b></td><td>1</td><td></td></tr> <tr><th><i>K_sou</i></th><td>0.191</td><td>0.016</td><td>-0.016</td><td>1</td></tr> </table>                                   |  | <i>K_eas</i> | <i>K_wes</i> | <i>K_nor</i> | <i>K_sou</i> | <i>K_eas</i> | 1 |  |  |  | <i>K_wes</i> | 0.166        | 1 |  |  | <i>K_nor</i> | 0.029        | <b>0.428</b> | 1 |  | <i>K_sou</i> | 0.191        | 0.016        | -0.016       | 1 |
|              | <i>K_eas</i>                                                                                                                                                                                                                                                                                                                                                                                                                          | <i>K_wes</i> | <i>K_nor</i>  | <i>K_sou</i> |              |              |              |   |  |  |  |              |       |   |  |  |              |       |       |   |  |              |       |       |       |   |                                                                                                                                                                                                                                                                                                                                                                                                                                                                                 |  |              |              |              |              |              |   |  |  |  |              |              |   |  |  |              |              |              |   |  |              |              |              |              |   |                                                                                                                                                                                                                                                                                                                                                                                                                                                |  |              |              |              |              |              |   |  |  |  |              |        |   |  |  |              |        |              |   |  |              |        |              |        |   |                                                                                                                                                                                                                                                                                                                                                                                                                                                                                 |  |              |              |              |              |              |   |  |  |  |              |              |   |  |  |              |              |              |   |  |              |              |              |              |   |
| <i>K_eas</i> | 1                                                                                                                                                                                                                                                                                                                                                                                                                                     |              |               |              |              |              |              |   |  |  |  |              |       |   |  |  |              |       |       |   |  |              |       |       |       |   |                                                                                                                                                                                                                                                                                                                                                                                                                                                                                 |  |              |              |              |              |              |   |  |  |  |              |              |   |  |  |              |              |              |   |  |              |              |              |              |   |                                                                                                                                                                                                                                                                                                                                                                                                                                                |  |              |              |              |              |              |   |  |  |  |              |        |   |  |  |              |        |              |   |  |              |        |              |        |   |                                                                                                                                                                                                                                                                                                                                                                                                                                                                                 |  |              |              |              |              |              |   |  |  |  |              |              |   |  |  |              |              |              |   |  |              |              |              |              |   |
| <i>K_wes</i> | 0.321                                                                                                                                                                                                                                                                                                                                                                                                                                 | 1            |               |              |              |              |              |   |  |  |  |              |       |   |  |  |              |       |       |   |  |              |       |       |       |   |                                                                                                                                                                                                                                                                                                                                                                                                                                                                                 |  |              |              |              |              |              |   |  |  |  |              |              |   |  |  |              |              |              |   |  |              |              |              |              |   |                                                                                                                                                                                                                                                                                                                                                                                                                                                |  |              |              |              |              |              |   |  |  |  |              |        |   |  |  |              |        |              |   |  |              |        |              |        |   |                                                                                                                                                                                                                                                                                                                                                                                                                                                                                 |  |              |              |              |              |              |   |  |  |  |              |              |   |  |  |              |              |              |   |  |              |              |              |              |   |
| <i>K_nor</i> | 0.786                                                                                                                                                                                                                                                                                                                                                                                                                                 | 0.432        | 1             |              |              |              |              |   |  |  |  |              |       |   |  |  |              |       |       |   |  |              |       |       |       |   |                                                                                                                                                                                                                                                                                                                                                                                                                                                                                 |  |              |              |              |              |              |   |  |  |  |              |              |   |  |  |              |              |              |   |  |              |              |              |              |   |                                                                                                                                                                                                                                                                                                                                                                                                                                                |  |              |              |              |              |              |   |  |  |  |              |        |   |  |  |              |        |              |   |  |              |        |              |        |   |                                                                                                                                                                                                                                                                                                                                                                                                                                                                                 |  |              |              |              |              |              |   |  |  |  |              |              |   |  |  |              |              |              |   |  |              |              |              |              |   |
| <i>K_sou</i> | 0.781                                                                                                                                                                                                                                                                                                                                                                                                                                 | 0.373        | 0.933         | 1            |              |              |              |   |  |  |  |              |       |   |  |  |              |       |       |   |  |              |       |       |       |   |                                                                                                                                                                                                                                                                                                                                                                                                                                                                                 |  |              |              |              |              |              |   |  |  |  |              |              |   |  |  |              |              |              |   |  |              |              |              |              |   |                                                                                                                                                                                                                                                                                                                                                                                                                                                |  |              |              |              |              |              |   |  |  |  |              |        |   |  |  |              |        |              |   |  |              |        |              |        |   |                                                                                                                                                                                                                                                                                                                                                                                                                                                                                 |  |              |              |              |              |              |   |  |  |  |              |              |   |  |  |              |              |              |   |  |              |              |              |              |   |
|              | <i>K_eas</i>                                                                                                                                                                                                                                                                                                                                                                                                                          | <i>K_wes</i> | <i>K_nor</i>  | <i>K_sou</i> |              |              |              |   |  |  |  |              |       |   |  |  |              |       |       |   |  |              |       |       |       |   |                                                                                                                                                                                                                                                                                                                                                                                                                                                                                 |  |              |              |              |              |              |   |  |  |  |              |              |   |  |  |              |              |              |   |  |              |              |              |              |   |                                                                                                                                                                                                                                                                                                                                                                                                                                                |  |              |              |              |              |              |   |  |  |  |              |        |   |  |  |              |        |              |   |  |              |        |              |        |   |                                                                                                                                                                                                                                                                                                                                                                                                                                                                                 |  |              |              |              |              |              |   |  |  |  |              |              |   |  |  |              |              |              |   |  |              |              |              |              |   |
| <i>K_eas</i> | 1                                                                                                                                                                                                                                                                                                                                                                                                                                     |              |               |              |              |              |              |   |  |  |  |              |       |   |  |  |              |       |       |   |  |              |       |       |       |   |                                                                                                                                                                                                                                                                                                                                                                                                                                                                                 |  |              |              |              |              |              |   |  |  |  |              |              |   |  |  |              |              |              |   |  |              |              |              |              |   |                                                                                                                                                                                                                                                                                                                                                                                                                                                |  |              |              |              |              |              |   |  |  |  |              |        |   |  |  |              |        |              |   |  |              |        |              |        |   |                                                                                                                                                                                                                                                                                                                                                                                                                                                                                 |  |              |              |              |              |              |   |  |  |  |              |              |   |  |  |              |              |              |   |  |              |              |              |              |   |
| <i>K_wes</i> | 0.212                                                                                                                                                                                                                                                                                                                                                                                                                                 | 1            |               |              |              |              |              |   |  |  |  |              |       |   |  |  |              |       |       |   |  |              |       |       |       |   |                                                                                                                                                                                                                                                                                                                                                                                                                                                                                 |  |              |              |              |              |              |   |  |  |  |              |              |   |  |  |              |              |              |   |  |              |              |              |              |   |                                                                                                                                                                                                                                                                                                                                                                                                                                                |  |              |              |              |              |              |   |  |  |  |              |        |   |  |  |              |        |              |   |  |              |        |              |        |   |                                                                                                                                                                                                                                                                                                                                                                                                                                                                                 |  |              |              |              |              |              |   |  |  |  |              |              |   |  |  |              |              |              |   |  |              |              |              |              |   |
| <i>K_nor</i> | 0.186                                                                                                                                                                                                                                                                                                                                                                                                                                 | 0.095        | 1             |              |              |              |              |   |  |  |  |              |       |   |  |  |              |       |       |   |  |              |       |       |       |   |                                                                                                                                                                                                                                                                                                                                                                                                                                                                                 |  |              |              |              |              |              |   |  |  |  |              |              |   |  |  |              |              |              |   |  |              |              |              |              |   |                                                                                                                                                                                                                                                                                                                                                                                                                                                |  |              |              |              |              |              |   |  |  |  |              |        |   |  |  |              |        |              |   |  |              |        |              |        |   |                                                                                                                                                                                                                                                                                                                                                                                                                                                                                 |  |              |              |              |              |              |   |  |  |  |              |              |   |  |  |              |              |              |   |  |              |              |              |              |   |
| <i>K_sou</i> | 0.179                                                                                                                                                                                                                                                                                                                                                                                                                                 | -0.102       | <b>0.637</b>  | 1            |              |              |              |   |  |  |  |              |       |   |  |  |              |       |       |   |  |              |       |       |       |   |                                                                                                                                                                                                                                                                                                                                                                                                                                                                                 |  |              |              |              |              |              |   |  |  |  |              |              |   |  |  |              |              |              |   |  |              |              |              |              |   |                                                                                                                                                                                                                                                                                                                                                                                                                                                |  |              |              |              |              |              |   |  |  |  |              |        |   |  |  |              |        |              |   |  |              |        |              |        |   |                                                                                                                                                                                                                                                                                                                                                                                                                                                                                 |  |              |              |              |              |              |   |  |  |  |              |              |   |  |  |              |              |              |   |  |              |              |              |              |   |
|              | <i>K_eas</i>                                                                                                                                                                                                                                                                                                                                                                                                                          | <i>K_wes</i> | <i>K_nor</i>  | <i>K_sou</i> |              |              |              |   |  |  |  |              |       |   |  |  |              |       |       |   |  |              |       |       |       |   |                                                                                                                                                                                                                                                                                                                                                                                                                                                                                 |  |              |              |              |              |              |   |  |  |  |              |              |   |  |  |              |              |              |   |  |              |              |              |              |   |                                                                                                                                                                                                                                                                                                                                                                                                                                                |  |              |              |              |              |              |   |  |  |  |              |        |   |  |  |              |        |              |   |  |              |        |              |        |   |                                                                                                                                                                                                                                                                                                                                                                                                                                                                                 |  |              |              |              |              |              |   |  |  |  |              |              |   |  |  |              |              |              |   |  |              |              |              |              |   |
| <i>K_eas</i> | 1                                                                                                                                                                                                                                                                                                                                                                                                                                     |              |               |              |              |              |              |   |  |  |  |              |       |   |  |  |              |       |       |   |  |              |       |       |       |   |                                                                                                                                                                                                                                                                                                                                                                                                                                                                                 |  |              |              |              |              |              |   |  |  |  |              |              |   |  |  |              |              |              |   |  |              |              |              |              |   |                                                                                                                                                                                                                                                                                                                                                                                                                                                |  |              |              |              |              |              |   |  |  |  |              |        |   |  |  |              |        |              |   |  |              |        |              |        |   |                                                                                                                                                                                                                                                                                                                                                                                                                                                                                 |  |              |              |              |              |              |   |  |  |  |              |              |   |  |  |              |              |              |   |  |              |              |              |              |   |
| <i>K_wes</i> | -0.052                                                                                                                                                                                                                                                                                                                                                                                                                                | 1            |               |              |              |              |              |   |  |  |  |              |       |   |  |  |              |       |       |   |  |              |       |       |       |   |                                                                                                                                                                                                                                                                                                                                                                                                                                                                                 |  |              |              |              |              |              |   |  |  |  |              |              |   |  |  |              |              |              |   |  |              |              |              |              |   |                                                                                                                                                                                                                                                                                                                                                                                                                                                |  |              |              |              |              |              |   |  |  |  |              |        |   |  |  |              |        |              |   |  |              |        |              |        |   |                                                                                                                                                                                                                                                                                                                                                                                                                                                                                 |  |              |              |              |              |              |   |  |  |  |              |              |   |  |  |              |              |              |   |  |              |              |              |              |   |
| <i>K_nor</i> | 0.140                                                                                                                                                                                                                                                                                                                                                                                                                                 | 0.094        | 1             |              |              |              |              |   |  |  |  |              |       |   |  |  |              |       |       |   |  |              |       |       |       |   |                                                                                                                                                                                                                                                                                                                                                                                                                                                                                 |  |              |              |              |              |              |   |  |  |  |              |              |   |  |  |              |              |              |   |  |              |              |              |              |   |                                                                                                                                                                                                                                                                                                                                                                                                                                                |  |              |              |              |              |              |   |  |  |  |              |        |   |  |  |              |        |              |   |  |              |        |              |        |   |                                                                                                                                                                                                                                                                                                                                                                                                                                                                                 |  |              |              |              |              |              |   |  |  |  |              |              |   |  |  |              |              |              |   |  |              |              |              |              |   |
| <i>K_sou</i> | 0.088                                                                                                                                                                                                                                                                                                                                                                                                                                 | -0.103       | 0.041         | 1            |              |              |              |   |  |  |  |              |       |   |  |  |              |       |       |   |  |              |       |       |       |   |                                                                                                                                                                                                                                                                                                                                                                                                                                                                                 |  |              |              |              |              |              |   |  |  |  |              |              |   |  |  |              |              |              |   |  |              |              |              |              |   |                                                                                                                                                                                                                                                                                                                                                                                                                                                |  |              |              |              |              |              |   |  |  |  |              |        |   |  |  |              |        |              |   |  |              |        |              |        |   |                                                                                                                                                                                                                                                                                                                                                                                                                                                                                 |  |              |              |              |              |              |   |  |  |  |              |              |   |  |  |              |              |              |   |  |              |              |              |              |   |
|              | <i>K_eas</i>                                                                                                                                                                                                                                                                                                                                                                                                                          | <i>K_wes</i> | <i>K_nor</i>  | <i>K_sou</i> |              |              |              |   |  |  |  |              |       |   |  |  |              |       |       |   |  |              |       |       |       |   |                                                                                                                                                                                                                                                                                                                                                                                                                                                                                 |  |              |              |              |              |              |   |  |  |  |              |              |   |  |  |              |              |              |   |  |              |              |              |              |   |                                                                                                                                                                                                                                                                                                                                                                                                                                                |  |              |              |              |              |              |   |  |  |  |              |        |   |  |  |              |        |              |   |  |              |        |              |        |   |                                                                                                                                                                                                                                                                                                                                                                                                                                                                                 |  |              |              |              |              |              |   |  |  |  |              |              |   |  |  |              |              |              |   |  |              |              |              |              |   |
| <i>K_eas</i> | 1                                                                                                                                                                                                                                                                                                                                                                                                                                     |              |               |              |              |              |              |   |  |  |  |              |       |   |  |  |              |       |       |   |  |              |       |       |       |   |                                                                                                                                                                                                                                                                                                                                                                                                                                                                                 |  |              |              |              |              |              |   |  |  |  |              |              |   |  |  |              |              |              |   |  |              |              |              |              |   |                                                                                                                                                                                                                                                                                                                                                                                                                                                |  |              |              |              |              |              |   |  |  |  |              |        |   |  |  |              |        |              |   |  |              |        |              |        |   |                                                                                                                                                                                                                                                                                                                                                                                                                                                                                 |  |              |              |              |              |              |   |  |  |  |              |              |   |  |  |              |              |              |   |  |              |              |              |              |   |
| <i>K_wes</i> | 0.166                                                                                                                                                                                                                                                                                                                                                                                                                                 | 1            |               |              |              |              |              |   |  |  |  |              |       |   |  |  |              |       |       |   |  |              |       |       |       |   |                                                                                                                                                                                                                                                                                                                                                                                                                                                                                 |  |              |              |              |              |              |   |  |  |  |              |              |   |  |  |              |              |              |   |  |              |              |              |              |   |                                                                                                                                                                                                                                                                                                                                                                                                                                                |  |              |              |              |              |              |   |  |  |  |              |        |   |  |  |              |        |              |   |  |              |        |              |        |   |                                                                                                                                                                                                                                                                                                                                                                                                                                                                                 |  |              |              |              |              |              |   |  |  |  |              |              |   |  |  |              |              |              |   |  |              |              |              |              |   |
| <i>K_nor</i> | 0.029                                                                                                                                                                                                                                                                                                                                                                                                                                 | <b>0.428</b> | 1             |              |              |              |              |   |  |  |  |              |       |   |  |  |              |       |       |   |  |              |       |       |       |   |                                                                                                                                                                                                                                                                                                                                                                                                                                                                                 |  |              |              |              |              |              |   |  |  |  |              |              |   |  |  |              |              |              |   |  |              |              |              |              |   |                                                                                                                                                                                                                                                                                                                                                                                                                                                |  |              |              |              |              |              |   |  |  |  |              |        |   |  |  |              |        |              |   |  |              |        |              |        |   |                                                                                                                                                                                                                                                                                                                                                                                                                                                                                 |  |              |              |              |              |              |   |  |  |  |              |              |   |  |  |              |              |              |   |  |              |              |              |              |   |
| <i>K_sou</i> | 0.191                                                                                                                                                                                                                                                                                                                                                                                                                                 | 0.016        | -0.016        | 1            |              |              |              |   |  |  |  |              |       |   |  |  |              |       |       |   |  |              |       |       |       |   |                                                                                                                                                                                                                                                                                                                                                                                                                                                                                 |  |              |              |              |              |              |   |  |  |  |              |              |   |  |  |              |              |              |   |  |              |              |              |              |   |                                                                                                                                                                                                                                                                                                                                                                                                                                                |  |              |              |              |              |              |   |  |  |  |              |        |   |  |  |              |        |              |   |  |              |        |              |        |   |                                                                                                                                                                                                                                                                                                                                                                                                                                                                                 |  |              |              |              |              |              |   |  |  |  |              |              |   |  |  |              |              |              |   |  |              |              |              |              |   |
| pine #5      | <table> <tr><th></th><th><i>K_eas</i></th><th><i>K_wes</i></th><th><i>K_nor</i></th><th><i>K_sou</i></th></tr> <tr><th><i>K_eas</i></th><td>1</td><td></td><td></td><td></td></tr> <tr><th><i>K_wes</i></th><td>0.739</td><td>1</td><td></td><td></td></tr> <tr><th><i>K_nor</i></th><td>0.652</td><td>0.848</td><td>1</td><td></td></tr> <tr><th><i>K_sou</i></th><td>0.727</td><td>0.749</td><td>0.750</td><td>1</td></tr> </table> |              | <i>K_eas</i>  | <i>K_wes</i> | <i>K_nor</i> | <i>K_sou</i> | <i>K_eas</i> | 1 |  |  |  | <i>K_wes</i> | 0.739 | 1 |  |  | <i>K_nor</i> | 0.652 | 0.848 | 1 |  | <i>K_sou</i> | 0.727 | 0.749 | 0.750 | 1 | <table> <tr><th></th><th><i>K_eas</i></th><th><i>K_wes</i></th><th><i>K_nor</i></th><th><i>K_sou</i></th></tr> <tr><th><i>K_eas</i></th><td>1</td><td></td><td></td><td></td></tr> <tr><th><i>K_wes</i></th><td>-0.153</td><td>1</td><td></td><td></td></tr> <tr><th><i>K_nor</i></th><td>0.053</td><td><b>0.356</b></td><td>1</td><td></td></tr> <tr><th><i>K_sou</i></th><td>0.250</td><td>0.195</td><td><b>0.669</b></td><td>1</td></tr> </table>                            |  | <i>K_eas</i> | <i>K_wes</i> | <i>K_nor</i> | <i>K_sou</i> | <i>K_eas</i> | 1 |  |  |  | <i>K_wes</i> | -0.153       | 1 |  |  | <i>K_nor</i> | 0.053        | <b>0.356</b> | 1 |  | <i>K_sou</i> | 0.250        | 0.195        | <b>0.669</b> | 1 | <table> <tr><th></th><th><i>K_eas</i></th><th><i>K_wes</i></th><th><i>K_nor</i></th><th><i>K_sou</i></th></tr> <tr><th><i>K_eas</i></th><td>1</td><td></td><td></td><td></td></tr> <tr><th><i>K_wes</i></th><td>0.196</td><td>1</td><td></td><td></td></tr> <tr><th><i>K_nor</i></th><td>0.094</td><td>0.098</td><td>1</td><td></td></tr> <tr><th><i>K_sou</i></th><td>-0.051</td><td>0.096</td><td>0.034</td><td>1</td></tr> </table>         |  | <i>K_eas</i> | <i>K_wes</i> | <i>K_nor</i> | <i>K_sou</i> | <i>K_eas</i> | 1 |  |  |  | <i>K_wes</i> | 0.196  | 1 |  |  | <i>K_nor</i> | 0.094  | 0.098        | 1 |  | <i>K_sou</i> | -0.051 | 0.096        | 0.034  | 1 | <table> <tr><th></th><th><i>K_eas</i></th><th><i>K_wes</i></th><th><i>K_nor</i></th><th><i>K_sou</i></th></tr> <tr><th><i>K_eas</i></th><td>1</td><td></td><td></td><td></td></tr> <tr><th><i>K_wes</i></th><td><b>0.342</b></td><td>1</td><td></td><td></td></tr> <tr><th><i>K_nor</i></th><td>0.286</td><td><b>0.339</b></td><td>1</td><td></td></tr> <tr><th><i>K_sou</i></th><td>0.200</td><td>0.168</td><td>0.108</td><td>1</td></tr> </table>                             |  | <i>K_eas</i> | <i>K_wes</i> | <i>K_nor</i> | <i>K_sou</i> | <i>K_eas</i> | 1 |  |  |  | <i>K_wes</i> | <b>0.342</b> | 1 |  |  | <i>K_nor</i> | 0.286        | <b>0.339</b> | 1 |  | <i>K_sou</i> | 0.200        | 0.168        | 0.108        | 1 |
|              | <i>K_eas</i>                                                                                                                                                                                                                                                                                                                                                                                                                          | <i>K_wes</i> | <i>K_nor</i>  | <i>K_sou</i> |              |              |              |   |  |  |  |              |       |   |  |  |              |       |       |   |  |              |       |       |       |   |                                                                                                                                                                                                                                                                                                                                                                                                                                                                                 |  |              |              |              |              |              |   |  |  |  |              |              |   |  |  |              |              |              |   |  |              |              |              |              |   |                                                                                                                                                                                                                                                                                                                                                                                                                                                |  |              |              |              |              |              |   |  |  |  |              |        |   |  |  |              |        |              |   |  |              |        |              |        |   |                                                                                                                                                                                                                                                                                                                                                                                                                                                                                 |  |              |              |              |              |              |   |  |  |  |              |              |   |  |  |              |              |              |   |  |              |              |              |              |   |
| <i>K_eas</i> | 1                                                                                                                                                                                                                                                                                                                                                                                                                                     |              |               |              |              |              |              |   |  |  |  |              |       |   |  |  |              |       |       |   |  |              |       |       |       |   |                                                                                                                                                                                                                                                                                                                                                                                                                                                                                 |  |              |              |              |              |              |   |  |  |  |              |              |   |  |  |              |              |              |   |  |              |              |              |              |   |                                                                                                                                                                                                                                                                                                                                                                                                                                                |  |              |              |              |              |              |   |  |  |  |              |        |   |  |  |              |        |              |   |  |              |        |              |        |   |                                                                                                                                                                                                                                                                                                                                                                                                                                                                                 |  |              |              |              |              |              |   |  |  |  |              |              |   |  |  |              |              |              |   |  |              |              |              |              |   |
| <i>K_wes</i> | 0.739                                                                                                                                                                                                                                                                                                                                                                                                                                 | 1            |               |              |              |              |              |   |  |  |  |              |       |   |  |  |              |       |       |   |  |              |       |       |       |   |                                                                                                                                                                                                                                                                                                                                                                                                                                                                                 |  |              |              |              |              |              |   |  |  |  |              |              |   |  |  |              |              |              |   |  |              |              |              |              |   |                                                                                                                                                                                                                                                                                                                                                                                                                                                |  |              |              |              |              |              |   |  |  |  |              |        |   |  |  |              |        |              |   |  |              |        |              |        |   |                                                                                                                                                                                                                                                                                                                                                                                                                                                                                 |  |              |              |              |              |              |   |  |  |  |              |              |   |  |  |              |              |              |   |  |              |              |              |              |   |
| <i>K_nor</i> | 0.652                                                                                                                                                                                                                                                                                                                                                                                                                                 | 0.848        | 1             |              |              |              |              |   |  |  |  |              |       |   |  |  |              |       |       |   |  |              |       |       |       |   |                                                                                                                                                                                                                                                                                                                                                                                                                                                                                 |  |              |              |              |              |              |   |  |  |  |              |              |   |  |  |              |              |              |   |  |              |              |              |              |   |                                                                                                                                                                                                                                                                                                                                                                                                                                                |  |              |              |              |              |              |   |  |  |  |              |        |   |  |  |              |        |              |   |  |              |        |              |        |   |                                                                                                                                                                                                                                                                                                                                                                                                                                                                                 |  |              |              |              |              |              |   |  |  |  |              |              |   |  |  |              |              |              |   |  |              |              |              |              |   |
| <i>K_sou</i> | 0.727                                                                                                                                                                                                                                                                                                                                                                                                                                 | 0.749        | 0.750         | 1            |              |              |              |   |  |  |  |              |       |   |  |  |              |       |       |   |  |              |       |       |       |   |                                                                                                                                                                                                                                                                                                                                                                                                                                                                                 |  |              |              |              |              |              |   |  |  |  |              |              |   |  |  |              |              |              |   |  |              |              |              |              |   |                                                                                                                                                                                                                                                                                                                                                                                                                                                |  |              |              |              |              |              |   |  |  |  |              |        |   |  |  |              |        |              |   |  |              |        |              |        |   |                                                                                                                                                                                                                                                                                                                                                                                                                                                                                 |  |              |              |              |              |              |   |  |  |  |              |              |   |  |  |              |              |              |   |  |              |              |              |              |   |
|              | <i>K_eas</i>                                                                                                                                                                                                                                                                                                                                                                                                                          | <i>K_wes</i> | <i>K_nor</i>  | <i>K_sou</i> |              |              |              |   |  |  |  |              |       |   |  |  |              |       |       |   |  |              |       |       |       |   |                                                                                                                                                                                                                                                                                                                                                                                                                                                                                 |  |              |              |              |              |              |   |  |  |  |              |              |   |  |  |              |              |              |   |  |              |              |              |              |   |                                                                                                                                                                                                                                                                                                                                                                                                                                                |  |              |              |              |              |              |   |  |  |  |              |        |   |  |  |              |        |              |   |  |              |        |              |        |   |                                                                                                                                                                                                                                                                                                                                                                                                                                                                                 |  |              |              |              |              |              |   |  |  |  |              |              |   |  |  |              |              |              |   |  |              |              |              |              |   |
| <i>K_eas</i> | 1                                                                                                                                                                                                                                                                                                                                                                                                                                     |              |               |              |              |              |              |   |  |  |  |              |       |   |  |  |              |       |       |   |  |              |       |       |       |   |                                                                                                                                                                                                                                                                                                                                                                                                                                                                                 |  |              |              |              |              |              |   |  |  |  |              |              |   |  |  |              |              |              |   |  |              |              |              |              |   |                                                                                                                                                                                                                                                                                                                                                                                                                                                |  |              |              |              |              |              |   |  |  |  |              |        |   |  |  |              |        |              |   |  |              |        |              |        |   |                                                                                                                                                                                                                                                                                                                                                                                                                                                                                 |  |              |              |              |              |              |   |  |  |  |              |              |   |  |  |              |              |              |   |  |              |              |              |              |   |
| <i>K_wes</i> | -0.153                                                                                                                                                                                                                                                                                                                                                                                                                                | 1            |               |              |              |              |              |   |  |  |  |              |       |   |  |  |              |       |       |   |  |              |       |       |       |   |                                                                                                                                                                                                                                                                                                                                                                                                                                                                                 |  |              |              |              |              |              |   |  |  |  |              |              |   |  |  |              |              |              |   |  |              |              |              |              |   |                                                                                                                                                                                                                                                                                                                                                                                                                                                |  |              |              |              |              |              |   |  |  |  |              |        |   |  |  |              |        |              |   |  |              |        |              |        |   |                                                                                                                                                                                                                                                                                                                                                                                                                                                                                 |  |              |              |              |              |              |   |  |  |  |              |              |   |  |  |              |              |              |   |  |              |              |              |              |   |
| <i>K_nor</i> | 0.053                                                                                                                                                                                                                                                                                                                                                                                                                                 | <b>0.356</b> | 1             |              |              |              |              |   |  |  |  |              |       |   |  |  |              |       |       |   |  |              |       |       |       |   |                                                                                                                                                                                                                                                                                                                                                                                                                                                                                 |  |              |              |              |              |              |   |  |  |  |              |              |   |  |  |              |              |              |   |  |              |              |              |              |   |                                                                                                                                                                                                                                                                                                                                                                                                                                                |  |              |              |              |              |              |   |  |  |  |              |        |   |  |  |              |        |              |   |  |              |        |              |        |   |                                                                                                                                                                                                                                                                                                                                                                                                                                                                                 |  |              |              |              |              |              |   |  |  |  |              |              |   |  |  |              |              |              |   |  |              |              |              |              |   |
| <i>K_sou</i> | 0.250                                                                                                                                                                                                                                                                                                                                                                                                                                 | 0.195        | <b>0.669</b>  | 1            |              |              |              |   |  |  |  |              |       |   |  |  |              |       |       |   |  |              |       |       |       |   |                                                                                                                                                                                                                                                                                                                                                                                                                                                                                 |  |              |              |              |              |              |   |  |  |  |              |              |   |  |  |              |              |              |   |  |              |              |              |              |   |                                                                                                                                                                                                                                                                                                                                                                                                                                                |  |              |              |              |              |              |   |  |  |  |              |        |   |  |  |              |        |              |   |  |              |        |              |        |   |                                                                                                                                                                                                                                                                                                                                                                                                                                                                                 |  |              |              |              |              |              |   |  |  |  |              |              |   |  |  |              |              |              |   |  |              |              |              |              |   |
|              | <i>K_eas</i>                                                                                                                                                                                                                                                                                                                                                                                                                          | <i>K_wes</i> | <i>K_nor</i>  | <i>K_sou</i> |              |              |              |   |  |  |  |              |       |   |  |  |              |       |       |   |  |              |       |       |       |   |                                                                                                                                                                                                                                                                                                                                                                                                                                                                                 |  |              |              |              |              |              |   |  |  |  |              |              |   |  |  |              |              |              |   |  |              |              |              |              |   |                                                                                                                                                                                                                                                                                                                                                                                                                                                |  |              |              |              |              |              |   |  |  |  |              |        |   |  |  |              |        |              |   |  |              |        |              |        |   |                                                                                                                                                                                                                                                                                                                                                                                                                                                                                 |  |              |              |              |              |              |   |  |  |  |              |              |   |  |  |              |              |              |   |  |              |              |              |              |   |
| <i>K_eas</i> | 1                                                                                                                                                                                                                                                                                                                                                                                                                                     |              |               |              |              |              |              |   |  |  |  |              |       |   |  |  |              |       |       |   |  |              |       |       |       |   |                                                                                                                                                                                                                                                                                                                                                                                                                                                                                 |  |              |              |              |              |              |   |  |  |  |              |              |   |  |  |              |              |              |   |  |              |              |              |              |   |                                                                                                                                                                                                                                                                                                                                                                                                                                                |  |              |              |              |              |              |   |  |  |  |              |        |   |  |  |              |        |              |   |  |              |        |              |        |   |                                                                                                                                                                                                                                                                                                                                                                                                                                                                                 |  |              |              |              |              |              |   |  |  |  |              |              |   |  |  |              |              |              |   |  |              |              |              |              |   |
| <i>K_wes</i> | 0.196                                                                                                                                                                                                                                                                                                                                                                                                                                 | 1            |               |              |              |              |              |   |  |  |  |              |       |   |  |  |              |       |       |   |  |              |       |       |       |   |                                                                                                                                                                                                                                                                                                                                                                                                                                                                                 |  |              |              |              |              |              |   |  |  |  |              |              |   |  |  |              |              |              |   |  |              |              |              |              |   |                                                                                                                                                                                                                                                                                                                                                                                                                                                |  |              |              |              |              |              |   |  |  |  |              |        |   |  |  |              |        |              |   |  |              |        |              |        |   |                                                                                                                                                                                                                                                                                                                                                                                                                                                                                 |  |              |              |              |              |              |   |  |  |  |              |              |   |  |  |              |              |              |   |  |              |              |              |              |   |
| <i>K_nor</i> | 0.094                                                                                                                                                                                                                                                                                                                                                                                                                                 | 0.098        | 1             |              |              |              |              |   |  |  |  |              |       |   |  |  |              |       |       |   |  |              |       |       |       |   |                                                                                                                                                                                                                                                                                                                                                                                                                                                                                 |  |              |              |              |              |              |   |  |  |  |              |              |   |  |  |              |              |              |   |  |              |              |              |              |   |                                                                                                                                                                                                                                                                                                                                                                                                                                                |  |              |              |              |              |              |   |  |  |  |              |        |   |  |  |              |        |              |   |  |              |        |              |        |   |                                                                                                                                                                                                                                                                                                                                                                                                                                                                                 |  |              |              |              |              |              |   |  |  |  |              |              |   |  |  |              |              |              |   |  |              |              |              |              |   |
| <i>K_sou</i> | -0.051                                                                                                                                                                                                                                                                                                                                                                                                                                | 0.096        | 0.034         | 1            |              |              |              |   |  |  |  |              |       |   |  |  |              |       |       |   |  |              |       |       |       |   |                                                                                                                                                                                                                                                                                                                                                                                                                                                                                 |  |              |              |              |              |              |   |  |  |  |              |              |   |  |  |              |              |              |   |  |              |              |              |              |   |                                                                                                                                                                                                                                                                                                                                                                                                                                                |  |              |              |              |              |              |   |  |  |  |              |        |   |  |  |              |        |              |   |  |              |        |              |        |   |                                                                                                                                                                                                                                                                                                                                                                                                                                                                                 |  |              |              |              |              |              |   |  |  |  |              |              |   |  |  |              |              |              |   |  |              |              |              |              |   |
|              | <i>K_eas</i>                                                                                                                                                                                                                                                                                                                                                                                                                          | <i>K_wes</i> | <i>K_nor</i>  | <i>K_sou</i> |              |              |              |   |  |  |  |              |       |   |  |  |              |       |       |   |  |              |       |       |       |   |                                                                                                                                                                                                                                                                                                                                                                                                                                                                                 |  |              |              |              |              |              |   |  |  |  |              |              |   |  |  |              |              |              |   |  |              |              |              |              |   |                                                                                                                                                                                                                                                                                                                                                                                                                                                |  |              |              |              |              |              |   |  |  |  |              |        |   |  |  |              |        |              |   |  |              |        |              |        |   |                                                                                                                                                                                                                                                                                                                                                                                                                                                                                 |  |              |              |              |              |              |   |  |  |  |              |              |   |  |  |              |              |              |   |  |              |              |              |              |   |
| <i>K_eas</i> | 1                                                                                                                                                                                                                                                                                                                                                                                                                                     |              |               |              |              |              |              |   |  |  |  |              |       |   |  |  |              |       |       |   |  |              |       |       |       |   |                                                                                                                                                                                                                                                                                                                                                                                                                                                                                 |  |              |              |              |              |              |   |  |  |  |              |              |   |  |  |              |              |              |   |  |              |              |              |              |   |                                                                                                                                                                                                                                                                                                                                                                                                                                                |  |              |              |              |              |              |   |  |  |  |              |        |   |  |  |              |        |              |   |  |              |        |              |        |   |                                                                                                                                                                                                                                                                                                                                                                                                                                                                                 |  |              |              |              |              |              |   |  |  |  |              |              |   |  |  |              |              |              |   |  |              |              |              |              |   |
| <i>K_wes</i> | <b>0.342</b>                                                                                                                                                                                                                                                                                                                                                                                                                          | 1            |               |              |              |              |              |   |  |  |  |              |       |   |  |  |              |       |       |   |  |              |       |       |       |   |                                                                                                                                                                                                                                                                                                                                                                                                                                                                                 |  |              |              |              |              |              |   |  |  |  |              |              |   |  |  |              |              |              |   |  |              |              |              |              |   |                                                                                                                                                                                                                                                                                                                                                                                                                                                |  |              |              |              |              |              |   |  |  |  |              |        |   |  |  |              |        |              |   |  |              |        |              |        |   |                                                                                                                                                                                                                                                                                                                                                                                                                                                                                 |  |              |              |              |              |              |   |  |  |  |              |              |   |  |  |              |              |              |   |  |              |              |              |              |   |
| <i>K_nor</i> | 0.286                                                                                                                                                                                                                                                                                                                                                                                                                                 | <b>0.339</b> | 1             |              |              |              |              |   |  |  |  |              |       |   |  |  |              |       |       |   |  |              |       |       |       |   |                                                                                                                                                                                                                                                                                                                                                                                                                                                                                 |  |              |              |              |              |              |   |  |  |  |              |              |   |  |  |              |              |              |   |  |              |              |              |              |   |                                                                                                                                                                                                                                                                                                                                                                                                                                                |  |              |              |              |              |              |   |  |  |  |              |        |   |  |  |              |        |              |   |  |              |        |              |        |   |                                                                                                                                                                                                                                                                                                                                                                                                                                                                                 |  |              |              |              |              |              |   |  |  |  |              |              |   |  |  |              |              |              |   |  |              |              |              |              |   |
| <i>K_sou</i> | 0.200                                                                                                                                                                                                                                                                                                                                                                                                                                 | 0.168        | 0.108         | 1            |              |              |              |   |  |  |  |              |       |   |  |  |              |       |       |   |  |              |       |       |       |   |                                                                                                                                                                                                                                                                                                                                                                                                                                                                                 |  |              |              |              |              |              |   |  |  |  |              |              |   |  |  |              |              |              |   |  |              |              |              |              |   |                                                                                                                                                                                                                                                                                                                                                                                                                                                |  |              |              |              |              |              |   |  |  |  |              |        |   |  |  |              |        |              |   |  |              |        |              |        |   |                                                                                                                                                                                                                                                                                                                                                                                                                                                                                 |  |              |              |              |              |              |   |  |  |  |              |              |   |  |  |              |              |              |   |  |              |              |              |              |   |
| pine #6      | <table> <tr><th></th><th><i>K_eas</i></th><th><i>K_wes</i></th><th><i>K_nor</i></th><th><i>K_sou</i></th></tr> <tr><th><i>K_eas</i></th><td>1</td><td></td><td></td><td></td></tr> <tr><th><i>K_wes</i></th><td>0.817</td><td>1</td><td></td><td></td></tr> <tr><th><i>K_nor</i></th><td>0.587</td><td>0.441</td><td>1</td><td></td></tr> <tr><th><i>K_sou</i></th><td>0.718</td><td>0.774</td><td>0.326</td><td>1</td></tr> </table> |              | <i>K_eas</i>  | <i>K_wes</i> | <i>K_nor</i> | <i>K_sou</i> | <i>K_eas</i> | 1 |  |  |  | <i>K_wes</i> | 0.817 | 1 |  |  | <i>K_nor</i> | 0.587 | 0.441 | 1 |  | <i>K_sou</i> | 0.718 | 0.774 | 0.326 | 1 | <table> <tr><th></th><th><i>K_eas</i></th><th><i>K_wes</i></th><th><i>K_nor</i></th><th><i>K_sou</i></th></tr> <tr><th><i>K_eas</i></th><td>1</td><td></td><td></td><td></td></tr> <tr><th><i>K_wes</i></th><td><b>0.785</b></td><td>1</td><td></td><td></td></tr> <tr><th><i>K_nor</i></th><td><b>0.534</b></td><td>0.359</td><td>1</td><td></td></tr> <tr><th><i>K_sou</i></th><td><b>0.711</b></td><td><b>0.779</b></td><td><b>0.357</b></td><td>1</td></tr> </table>        |  | <i>K_eas</i> | <i>K_wes</i> | <i>K_nor</i> | <i>K_sou</i> | <i>K_eas</i> | 1 |  |  |  | <i>K_wes</i> | <b>0.785</b> | 1 |  |  | <i>K_nor</i> | <b>0.534</b> | 0.359        | 1 |  | <i>K_sou</i> | <b>0.711</b> | <b>0.779</b> | <b>0.357</b> | 1 | <table> <tr><th></th><th><i>K_eas</i></th><th><i>K_wes</i></th><th><i>K_nor</i></th><th><i>K_sou</i></th></tr> <tr><th><i>K_eas</i></th><td>1</td><td></td><td></td><td></td></tr> <tr><th><i>K_wes</i></th><td>0.181</td><td>1</td><td></td><td></td></tr> <tr><th><i>K_nor</i></th><td>0.018</td><td>-0.211</td><td>1</td><td></td></tr> <tr><th><i>K_sou</i></th><td>0.107</td><td><b>0.273</b></td><td>-0.093</td><td>1</td></tr> </table> |  | <i>K_eas</i> | <i>K_wes</i> | <i>K_nor</i> | <i>K_sou</i> | <i>K_eas</i> | 1 |  |  |  | <i>K_wes</i> | 0.181  | 1 |  |  | <i>K_nor</i> | 0.018  | -0.211       | 1 |  | <i>K_sou</i> | 0.107  | <b>0.273</b> | -0.093 | 1 | <table> <tr><th></th><th><i>K_eas</i></th><th><i>K_wes</i></th><th><i>K_nor</i></th><th><i>K_sou</i></th></tr> <tr><th><i>K_eas</i></th><td>1</td><td></td><td></td><td></td></tr> <tr><th><i>K_wes</i></th><td><b>0.345</b></td><td>1</td><td></td><td></td></tr> <tr><th><i>K_nor</i></th><td>0.191</td><td>0.079</td><td>1</td><td></td></tr> <tr><th><i>K_sou</i></th><td><b>0.276</b></td><td><b>0.369</b></td><td>0.141</td><td>1</td></tr> </table>                      |  | <i>K_eas</i> | <i>K_wes</i> | <i>K_nor</i> | <i>K_sou</i> | <i>K_eas</i> | 1 |  |  |  | <i>K_wes</i> | <b>0.345</b> | 1 |  |  | <i>K_nor</i> | 0.191        | 0.079        | 1 |  | <i>K_sou</i> | <b>0.276</b> | <b>0.369</b> | 0.141        | 1 |
|              | <i>K_eas</i>                                                                                                                                                                                                                                                                                                                                                                                                                          | <i>K_wes</i> | <i>K_nor</i>  | <i>K_sou</i> |              |              |              |   |  |  |  |              |       |   |  |  |              |       |       |   |  |              |       |       |       |   |                                                                                                                                                                                                                                                                                                                                                                                                                                                                                 |  |              |              |              |              |              |   |  |  |  |              |              |   |  |  |              |              |              |   |  |              |              |              |              |   |                                                                                                                                                                                                                                                                                                                                                                                                                                                |  |              |              |              |              |              |   |  |  |  |              |        |   |  |  |              |        |              |   |  |              |        |              |        |   |                                                                                                                                                                                                                                                                                                                                                                                                                                                                                 |  |              |              |              |              |              |   |  |  |  |              |              |   |  |  |              |              |              |   |  |              |              |              |              |   |
| <i>K_eas</i> | 1                                                                                                                                                                                                                                                                                                                                                                                                                                     |              |               |              |              |              |              |   |  |  |  |              |       |   |  |  |              |       |       |   |  |              |       |       |       |   |                                                                                                                                                                                                                                                                                                                                                                                                                                                                                 |  |              |              |              |              |              |   |  |  |  |              |              |   |  |  |              |              |              |   |  |              |              |              |              |   |                                                                                                                                                                                                                                                                                                                                                                                                                                                |  |              |              |              |              |              |   |  |  |  |              |        |   |  |  |              |        |              |   |  |              |        |              |        |   |                                                                                                                                                                                                                                                                                                                                                                                                                                                                                 |  |              |              |              |              |              |   |  |  |  |              |              |   |  |  |              |              |              |   |  |              |              |              |              |   |
| <i>K_wes</i> | 0.817                                                                                                                                                                                                                                                                                                                                                                                                                                 | 1            |               |              |              |              |              |   |  |  |  |              |       |   |  |  |              |       |       |   |  |              |       |       |       |   |                                                                                                                                                                                                                                                                                                                                                                                                                                                                                 |  |              |              |              |              |              |   |  |  |  |              |              |   |  |  |              |              |              |   |  |              |              |              |              |   |                                                                                                                                                                                                                                                                                                                                                                                                                                                |  |              |              |              |              |              |   |  |  |  |              |        |   |  |  |              |        |              |   |  |              |        |              |        |   |                                                                                                                                                                                                                                                                                                                                                                                                                                                                                 |  |              |              |              |              |              |   |  |  |  |              |              |   |  |  |              |              |              |   |  |              |              |              |              |   |
| <i>K_nor</i> | 0.587                                                                                                                                                                                                                                                                                                                                                                                                                                 | 0.441        | 1             |              |              |              |              |   |  |  |  |              |       |   |  |  |              |       |       |   |  |              |       |       |       |   |                                                                                                                                                                                                                                                                                                                                                                                                                                                                                 |  |              |              |              |              |              |   |  |  |  |              |              |   |  |  |              |              |              |   |  |              |              |              |              |   |                                                                                                                                                                                                                                                                                                                                                                                                                                                |  |              |              |              |              |              |   |  |  |  |              |        |   |  |  |              |        |              |   |  |              |        |              |        |   |                                                                                                                                                                                                                                                                                                                                                                                                                                                                                 |  |              |              |              |              |              |   |  |  |  |              |              |   |  |  |              |              |              |   |  |              |              |              |              |   |
| <i>K_sou</i> | 0.718                                                                                                                                                                                                                                                                                                                                                                                                                                 | 0.774        | 0.326         | 1            |              |              |              |   |  |  |  |              |       |   |  |  |              |       |       |   |  |              |       |       |       |   |                                                                                                                                                                                                                                                                                                                                                                                                                                                                                 |  |              |              |              |              |              |   |  |  |  |              |              |   |  |  |              |              |              |   |  |              |              |              |              |   |                                                                                                                                                                                                                                                                                                                                                                                                                                                |  |              |              |              |              |              |   |  |  |  |              |        |   |  |  |              |        |              |   |  |              |        |              |        |   |                                                                                                                                                                                                                                                                                                                                                                                                                                                                                 |  |              |              |              |              |              |   |  |  |  |              |              |   |  |  |              |              |              |   |  |              |              |              |              |   |
|              | <i>K_eas</i>                                                                                                                                                                                                                                                                                                                                                                                                                          | <i>K_wes</i> | <i>K_nor</i>  | <i>K_sou</i> |              |              |              |   |  |  |  |              |       |   |  |  |              |       |       |   |  |              |       |       |       |   |                                                                                                                                                                                                                                                                                                                                                                                                                                                                                 |  |              |              |              |              |              |   |  |  |  |              |              |   |  |  |              |              |              |   |  |              |              |              |              |   |                                                                                                                                                                                                                                                                                                                                                                                                                                                |  |              |              |              |              |              |   |  |  |  |              |        |   |  |  |              |        |              |   |  |              |        |              |        |   |                                                                                                                                                                                                                                                                                                                                                                                                                                                                                 |  |              |              |              |              |              |   |  |  |  |              |              |   |  |  |              |              |              |   |  |              |              |              |              |   |
| <i>K_eas</i> | 1                                                                                                                                                                                                                                                                                                                                                                                                                                     |              |               |              |              |              |              |   |  |  |  |              |       |   |  |  |              |       |       |   |  |              |       |       |       |   |                                                                                                                                                                                                                                                                                                                                                                                                                                                                                 |  |              |              |              |              |              |   |  |  |  |              |              |   |  |  |              |              |              |   |  |              |              |              |              |   |                                                                                                                                                                                                                                                                                                                                                                                                                                                |  |              |              |              |              |              |   |  |  |  |              |        |   |  |  |              |        |              |   |  |              |        |              |        |   |                                                                                                                                                                                                                                                                                                                                                                                                                                                                                 |  |              |              |              |              |              |   |  |  |  |              |              |   |  |  |              |              |              |   |  |              |              |              |              |   |
| <i>K_wes</i> | <b>0.785</b>                                                                                                                                                                                                                                                                                                                                                                                                                          | 1            |               |              |              |              |              |   |  |  |  |              |       |   |  |  |              |       |       |   |  |              |       |       |       |   |                                                                                                                                                                                                                                                                                                                                                                                                                                                                                 |  |              |              |              |              |              |   |  |  |  |              |              |   |  |  |              |              |              |   |  |              |              |              |              |   |                                                                                                                                                                                                                                                                                                                                                                                                                                                |  |              |              |              |              |              |   |  |  |  |              |        |   |  |  |              |        |              |   |  |              |        |              |        |   |                                                                                                                                                                                                                                                                                                                                                                                                                                                                                 |  |              |              |              |              |              |   |  |  |  |              |              |   |  |  |              |              |              |   |  |              |              |              |              |   |
| <i>K_nor</i> | <b>0.534</b>                                                                                                                                                                                                                                                                                                                                                                                                                          | 0.359        | 1             |              |              |              |              |   |  |  |  |              |       |   |  |  |              |       |       |   |  |              |       |       |       |   |                                                                                                                                                                                                                                                                                                                                                                                                                                                                                 |  |              |              |              |              |              |   |  |  |  |              |              |   |  |  |              |              |              |   |  |              |              |              |              |   |                                                                                                                                                                                                                                                                                                                                                                                                                                                |  |              |              |              |              |              |   |  |  |  |              |        |   |  |  |              |        |              |   |  |              |        |              |        |   |                                                                                                                                                                                                                                                                                                                                                                                                                                                                                 |  |              |              |              |              |              |   |  |  |  |              |              |   |  |  |              |              |              |   |  |              |              |              |              |   |
| <i>K_sou</i> | <b>0.711</b>                                                                                                                                                                                                                                                                                                                                                                                                                          | <b>0.779</b> | <b>0.357</b>  | 1            |              |              |              |   |  |  |  |              |       |   |  |  |              |       |       |   |  |              |       |       |       |   |                                                                                                                                                                                                                                                                                                                                                                                                                                                                                 |  |              |              |              |              |              |   |  |  |  |              |              |   |  |  |              |              |              |   |  |              |              |              |              |   |                                                                                                                                                                                                                                                                                                                                                                                                                                                |  |              |              |              |              |              |   |  |  |  |              |        |   |  |  |              |        |              |   |  |              |        |              |        |   |                                                                                                                                                                                                                                                                                                                                                                                                                                                                                 |  |              |              |              |              |              |   |  |  |  |              |              |   |  |  |              |              |              |   |  |              |              |              |              |   |
|              | <i>K_eas</i>                                                                                                                                                                                                                                                                                                                                                                                                                          | <i>K_wes</i> | <i>K_nor</i>  | <i>K_sou</i> |              |              |              |   |  |  |  |              |       |   |  |  |              |       |       |   |  |              |       |       |       |   |                                                                                                                                                                                                                                                                                                                                                                                                                                                                                 |  |              |              |              |              |              |   |  |  |  |              |              |   |  |  |              |              |              |   |  |              |              |              |              |   |                                                                                                                                                                                                                                                                                                                                                                                                                                                |  |              |              |              |              |              |   |  |  |  |              |        |   |  |  |              |        |              |   |  |              |        |              |        |   |                                                                                                                                                                                                                                                                                                                                                                                                                                                                                 |  |              |              |              |              |              |   |  |  |  |              |              |   |  |  |              |              |              |   |  |              |              |              |              |   |
| <i>K_eas</i> | 1                                                                                                                                                                                                                                                                                                                                                                                                                                     |              |               |              |              |              |              |   |  |  |  |              |       |   |  |  |              |       |       |   |  |              |       |       |       |   |                                                                                                                                                                                                                                                                                                                                                                                                                                                                                 |  |              |              |              |              |              |   |  |  |  |              |              |   |  |  |              |              |              |   |  |              |              |              |              |   |                                                                                                                                                                                                                                                                                                                                                                                                                                                |  |              |              |              |              |              |   |  |  |  |              |        |   |  |  |              |        |              |   |  |              |        |              |        |   |                                                                                                                                                                                                                                                                                                                                                                                                                                                                                 |  |              |              |              |              |              |   |  |  |  |              |              |   |  |  |              |              |              |   |  |              |              |              |              |   |
| <i>K_wes</i> | 0.181                                                                                                                                                                                                                                                                                                                                                                                                                                 | 1            |               |              |              |              |              |   |  |  |  |              |       |   |  |  |              |       |       |   |  |              |       |       |       |   |                                                                                                                                                                                                                                                                                                                                                                                                                                                                                 |  |              |              |              |              |              |   |  |  |  |              |              |   |  |  |              |              |              |   |  |              |              |              |              |   |                                                                                                                                                                                                                                                                                                                                                                                                                                                |  |              |              |              |              |              |   |  |  |  |              |        |   |  |  |              |        |              |   |  |              |        |              |        |   |                                                                                                                                                                                                                                                                                                                                                                                                                                                                                 |  |              |              |              |              |              |   |  |  |  |              |              |   |  |  |              |              |              |   |  |              |              |              |              |   |
| <i>K_nor</i> | 0.018                                                                                                                                                                                                                                                                                                                                                                                                                                 | -0.211       | 1             |              |              |              |              |   |  |  |  |              |       |   |  |  |              |       |       |   |  |              |       |       |       |   |                                                                                                                                                                                                                                                                                                                                                                                                                                                                                 |  |              |              |              |              |              |   |  |  |  |              |              |   |  |  |              |              |              |   |  |              |              |              |              |   |                                                                                                                                                                                                                                                                                                                                                                                                                                                |  |              |              |              |              |              |   |  |  |  |              |        |   |  |  |              |        |              |   |  |              |        |              |        |   |                                                                                                                                                                                                                                                                                                                                                                                                                                                                                 |  |              |              |              |              |              |   |  |  |  |              |              |   |  |  |              |              |              |   |  |              |              |              |              |   |
| <i>K_sou</i> | 0.107                                                                                                                                                                                                                                                                                                                                                                                                                                 | <b>0.273</b> | -0.093        | 1            |              |              |              |   |  |  |  |              |       |   |  |  |              |       |       |   |  |              |       |       |       |   |                                                                                                                                                                                                                                                                                                                                                                                                                                                                                 |  |              |              |              |              |              |   |  |  |  |              |              |   |  |  |              |              |              |   |  |              |              |              |              |   |                                                                                                                                                                                                                                                                                                                                                                                                                                                |  |              |              |              |              |              |   |  |  |  |              |        |   |  |  |              |        |              |   |  |              |        |              |        |   |                                                                                                                                                                                                                                                                                                                                                                                                                                                                                 |  |              |              |              |              |              |   |  |  |  |              |              |   |  |  |              |              |              |   |  |              |              |              |              |   |
|              | <i>K_eas</i>                                                                                                                                                                                                                                                                                                                                                                                                                          | <i>K_wes</i> | <i>K_nor</i>  | <i>K_sou</i> |              |              |              |   |  |  |  |              |       |   |  |  |              |       |       |   |  |              |       |       |       |   |                                                                                                                                                                                                                                                                                                                                                                                                                                                                                 |  |              |              |              |              |              |   |  |  |  |              |              |   |  |  |              |              |              |   |  |              |              |              |              |   |                                                                                                                                                                                                                                                                                                                                                                                                                                                |  |              |              |              |              |              |   |  |  |  |              |        |   |  |  |              |        |              |   |  |              |        |              |        |   |                                                                                                                                                                                                                                                                                                                                                                                                                                                                                 |  |              |              |              |              |              |   |  |  |  |              |              |   |  |  |              |              |              |   |  |              |              |              |              |   |
| <i>K_eas</i> | 1                                                                                                                                                                                                                                                                                                                                                                                                                                     |              |               |              |              |              |              |   |  |  |  |              |       |   |  |  |              |       |       |   |  |              |       |       |       |   |                                                                                                                                                                                                                                                                                                                                                                                                                                                                                 |  |              |              |              |              |              |   |  |  |  |              |              |   |  |  |              |              |              |   |  |              |              |              |              |   |                                                                                                                                                                                                                                                                                                                                                                                                                                                |  |              |              |              |              |              |   |  |  |  |              |        |   |  |  |              |        |              |   |  |              |        |              |        |   |                                                                                                                                                                                                                                                                                                                                                                                                                                                                                 |  |              |              |              |              |              |   |  |  |  |              |              |   |  |  |              |              |              |   |  |              |              |              |              |   |
| <i>K_wes</i> | <b>0.345</b>                                                                                                                                                                                                                                                                                                                                                                                                                          | 1            |               |              |              |              |              |   |  |  |  |              |       |   |  |  |              |       |       |   |  |              |       |       |       |   |                                                                                                                                                                                                                                                                                                                                                                                                                                                                                 |  |              |              |              |              |              |   |  |  |  |              |              |   |  |  |              |              |              |   |  |              |              |              |              |   |                                                                                                                                                                                                                                                                                                                                                                                                                                                |  |              |              |              |              |              |   |  |  |  |              |        |   |  |  |              |        |              |   |  |              |        |              |        |   |                                                                                                                                                                                                                                                                                                                                                                                                                                                                                 |  |              |              |              |              |              |   |  |  |  |              |              |   |  |  |              |              |              |   |  |              |              |              |              |   |
| <i>K_nor</i> | 0.191                                                                                                                                                                                                                                                                                                                                                                                                                                 | 0.079        | 1             |              |              |              |              |   |  |  |  |              |       |   |  |  |              |       |       |   |  |              |       |       |       |   |                                                                                                                                                                                                                                                                                                                                                                                                                                                                                 |  |              |              |              |              |              |   |  |  |  |              |              |   |  |  |              |              |              |   |  |              |              |              |              |   |                                                                                                                                                                                                                                                                                                                                                                                                                                                |  |              |              |              |              |              |   |  |  |  |              |        |   |  |  |              |        |              |   |  |              |        |              |        |   |                                                                                                                                                                                                                                                                                                                                                                                                                                                                                 |  |              |              |              |              |              |   |  |  |  |              |              |   |  |  |              |              |              |   |  |              |              |              |              |   |
| <i>K_sou</i> | <b>0.276</b>                                                                                                                                                                                                                                                                                                                                                                                                                          | <b>0.369</b> | 0.141         | 1            |              |              |              |   |  |  |  |              |       |   |  |  |              |       |       |   |  |              |       |       |       |   |                                                                                                                                                                                                                                                                                                                                                                                                                                                                                 |  |              |              |              |              |              |   |  |  |  |              |              |   |  |  |              |              |              |   |  |              |              |              |              |   |                                                                                                                                                                                                                                                                                                                                                                                                                                                |  |              |              |              |              |              |   |  |  |  |              |        |   |  |  |              |        |              |   |  |              |        |              |        |   |                                                                                                                                                                                                                                                                                                                                                                                                                                                                                 |  |              |              |              |              |              |   |  |  |  |              |              |   |  |  |              |              |              |   |  |              |              |              |              |   |

**Bold font** = significant at  $p < 0.001$   
**Normal font** = significant at  $p < 0.05$
