# Supplementary material
Source: MDPI journal article supplement (https://www.mdpi.com/1424-2818/15/2/281)
Supplement: s1 [file s1]

Table S2. Coefficients of variation.

| Element/<br>direction | Pine #1 |       |      | Pine #2 |       |     | Pine #3 |       |     | Pine #4 |       |      | Pine #5 |       |      | Pine #6 |       |      |
|-----------------------|---------|-------|------|---------|-------|-----|---------|-------|-----|---------|-------|------|---------|-------|------|---------|-------|------|
|                       | SD*     | Mean  | CV** | SD      | Mean  | CV  | SD      | Mean  | CV  | SD      | Mean  | CV   | SD      | Mean  | CV   | SD      | Mean  | CV   |
| Al_eas                | 4.7     | 60.5  | 8%   | 4.9     | 56.1  | 9%  | 4.3     | 53.4  | 8%  | 5.8     | 55.7  | 11%  | 7.3     | 51.1  | 14%  | 5.2     | 55.7  | 9%   |
| Al_wes                | 4.9     | 57.7  | 9%   | 4.2     | 55.5  | 7%  | 4.7     | 50.7  | 9%  | 4.5     | 59.0  | 8%   | 6.1     | 53.1  | 11%  | 4.7     | 53.5  | 9%   |
| Al_nor                | 5.7     | 57.4  | 10%  | 5.0     | 54.5  | 9%  | 4.3     | 49.4  | 9%  | 6.4     | 56.8  | 11%  | 5.5     | 53.1  | 10%  | 4.8     | 54.4  | 9%   |
| Al_sou                | 5.5     | 59.5  | 9%   | 3.9     | 58.0  | 7%  | 5.5     | 50.0  | 11% | 5.7     | 53.8  | 11%  | 6.6     | 51.7  | 13%  | 6.2     | 54.1  | 11%  |
| Ca_eas                | 57.7    | 394.2 | 15%  | 73.2    | 356.5 | 21% | 50.8    | 354.6 | 14% | 91.3    | 441.1 | 21%  | 105.3   | 336.6 | 31%  | 61.4    | 357.2 | 17%  |
| Ca_wes                | 74.1    | 330.2 | 22%  | 60.3    | 315.6 | 19% | 58.8    | 347.7 | 17% | 47.7    | 412.5 | 12%  | 52.8    | 302.0 | 17%  | 72.4    | 408.8 | 18%  |
| Ca_nor                | 70.0    | 420.7 | 17%  | 63.9    | 324.8 | 20% | 42.7    | 303.0 | 14% | 86.4    | 390.7 | 22%  | 66.6    | 341.9 | 19%  | 96.0    | 447.5 | 21%  |
| Ca_sou                | 82.3    | 409.7 | 20%  | 75.9    | 349.9 | 22% | 56.3    | 336.3 | 17% | 73.1    | 406.4 | 18%  | 96.8    | 386.0 | 25%  | 55.0    | 298.1 | 18%  |
| Cl_eas                | 3.3     | 6.8   | 50%  | 4.3     | 6.0   | 72% | 2.5     | 4.1   | 61% | 2.7     | 3.6   | 75%  | 3.5     | 2.2   | 156% | 3.1     | 3.4   | 92%  |
| Cl_wes                | 2.7     | 5.6   | 48%  | 2.6     | 4.4   | 59% | 3.3     | 4.1   | 80% | 3.1     | 4.5   | 69%  | 2.9     | 2.8   | 102% | 1.9     | 2.1   | 92%  |
| Cl_nor                | 3.3     | 5.1   | 65%  | 4.1     | 6.0   | 69% | 1.5     | 2.0   | 77% | 5.0     | 4.4   | 112% | 2.1     | 1.9   | 108% | 1.1     | 1.4   | 82%  |
| Cl_sou                | 15.4    | 9.4   | 163% | 4.8     | 5.8   | 83% | 2.0     | 2.7   | 74% | 3.4     | 4.6   | 75%  | 2.4     | 2.2   | 109% | 2.3     | 3.0   | 76%  |
| Cu_eas                | 25.5    | 200.0 | 13%  | 28.4    | 226.8 | 13% | 21.4    | 241.3 | 9%  | 26.1    | 216.8 | 12%  | 34.7    | 207.1 | 17%  | 27.0    | 146.7 | 18%  |
| Cu_wes                | 21.7    | 169.7 | 13%  | 25.1    | 179.0 | 14% | 23.7    | 242.3 | 10% | 24.4    | 173.1 | 14%  | 32.1    | 150.9 | 21%  | 26.4    | 247.1 | 11%  |
| Cu_nor                | 25.3    | 245.0 | 10%  | 23.4    | 165.6 | 14% | 16.8    | 193.8 | 9%  | 25.4    | 145.5 | 17%  | 25.0    | 138.1 | 18%  | 22.6    | 228.3 | 10%  |
| Cu_sou                | 24.4    | 200.4 | 12%  | 29.2    | 210.7 | 14% | 24.4    | 219.2 | 11% | 24.8    | 249.1 | 10%  | 27.2    | 230.6 | 12%  | 24.7    | 176.0 | 14%  |
| Fe_eas                | 23.0    | 52.4  | 44%  | 20.6    | 53.4  | 39% | 14.7    | 64.3  | 23% | 14.1    | 59.3  | 24%  | 37.2    | 64.0  | 58%  | 66.0    | 60.8  | 109% |
| Fe_wes                | 11.0    | 45.5  | 24%  | 13.1    | 39.6  | 33% | 10.5    | 66.2  | 16% | 30.9    | 42.5  | 73%  | 14.8    | 49.1  | 30%  | 10.9    | 61.2  | 18%  |
| Fe_nor                | 9.5     | 61.4  | 16%  | 16.4    | 47.4  | 35% | 21.5    | 72.5  | 30% | 20.3    | 47.9  | 42%  | 27.9    | 45.8  | 61%  | 12.5    | 57.7  | 22%  |
| Fe_sou                | 18.6    | 44.9  | 41%  | 15.7    | 48.7  | 32% | 16.9    | 67.5  | 25% | 14.8    | 61.6  | 24%  | 18.1    | 57.1  | 32%  | 10.0    | 41.3  | 24%  |
| K_eas                 | 38.5    | 101.4 | 38%  | 22.8    | 77.1  | 30% | 35.6    | 85.6  | 42% | 24.9    | 73.6  | 34%  | 37.0    | 83.4  | 44%  | 34.8    | 97.1  | 36%  |
| K_wes                 | 26.0    | 76.0  | 34%  | 26.2    | 68.4  | 38% | 26.0    | 72.8  | 36% | 11.9    | 48.1  | 25%  | 35.7    | 62.8  | 57%  | 36.2    | 96.3  | 38%  |
| K_nor                 | 32.5    | 97.3  | 33%  | 24.1    | 70.9  | 34% | 21.8    | 53.5  | 41% | 28.6    | 60.0  | 48%  | 19.4    | 66.9  | 29%  | 13.6    | 88.3  | 15%  |
| K_sou                 | 27.1    | 82.5  | 33%  | 33.1    | 77.9  | 43% | 23.0    | 71.1  | 32% | 30.0    | 60.8  | 49%  | 23.0    | 96.4  | 24%  | 21.5    | 69.8  | 31%  |
| Mn_eas                | 8.3     | 79.0  | 11%  | 9.8     | 83.3  | 12% | 18.9    | 89.2  | 21% | 14.8    | 90.7  | 16%  | 13.1    | 107.7 | 12%  | 10.8    | 94.5  | 11%  |
| Mn_wes                | 9.3     | 80.7  | 12%  | 15.9    | 119.2 | 13% | 22.1    | 92.9  | 24% | 11.1    | 80.4  | 14%  | 14.0    | 77.2  | 18%  | 13.1    | 72.9  | 18%  |
| Mn_nor                | 11.8    | 75.4  | 16%  | 11.3    | 91.5  | 12% | 13.0    | 104.1 | 13% | 11.5    | 84.1  | 14%  | 13.4    | 84.3  | 16%  | 12.1    | 86.7  | 14%  |
| Mn_sou                | 11.1    | 75.0  | 15%  | 13.1    | 93.5  | 14% | 12.6    | 100.0 | 13% | 12.6    | 85.0  | 15%  | 15.2    | 112.5 | 13%  | 10.1    | 83.6  | 12%  |
| P_eas                 | 3.9     | 18.8  | 21%  | 3.2     | 12.2  | 26% | 3.1     | 12.0  | 25% | 4.3     | 11.8  | 36%  | 4.2     | 6.7   | 63%  | 3.5     | 12.1  | 29%  |
| P_wes                 | 4.1     | 14.2  | 29%  | 3.8     | 12.3  | 31% | 3.4     | 9.9   | 35% | 4.7     | 16.8  | 28%  | 4.4     | 9.7   | 46%  | 3.8     | 10.7  | 35%  |
| P_nor                 | 4.0     | 14.8  | 27%  | 3.4     | 11.8  | 29% | 2.8     | 8.4   | 33% | 4.7     | 13.6  | 35%  | 3.6     | 8.1   | 45%  | 3.5     | 9.5   | 37%  |
| P_sou                 | 3.3     | 16.1  | 21%  | 4.3     | 16.4  | 26% | 3.6     | 8.6   | 42% | 4.3     | 12.5  | 34%  | 3.9     | 8.4   | 46%  | 3.0     | 11.5  | 26%  |
| S_eas                 | 3.1     | 10.3  | 30%  | 2.4     | 6.2   | 39% | 2.4     | 5.7   | 42% | 3.3     | 5.7   | 58%  | 2.1     | 2.1   | 100% | 2.6     | 4.8   | 53%  |
| S_wes                 | 2.8     | 7.2   | 39%  | 3.1     | 6.5   | 47% | 2.4     | 4.4   | 53% | 3.6     | 7.8   | 47%  | 2.8     | 4.1   | 67%  | 2.4     | 4.0   | 60%  |
| S_nor                 | 2.9     | 7.6   | 38%  | 2.7     | 5.3   | 52% | 1.7     | 3.4   | 50% | 3.6     | 6.4   | 56%  | 2.5     | 3.2   | 78%  | 1.9     | 3.6   | 54%  |
| S_sou                 | 5.5     | 10.9  | 50%  | 3.6     | 8.4   | 43% | 2.4     | 4.3   | 55% | 3.1     | 6.7   | 46%  | 2.7     | 3.0   | 88%  | 2.7     | 5.0   | 54%  |
| Si_eas                | 4.2     | 30.8  | 13%  | 6.1     | 23.9  | 26% | 3.5     | 20.0  | 18% | 5.1     | 20.8  | 25%  | 5.5     | 13.1  | 42%  | 4.8     | 22.8  | 21%  |
| Si_wes                | 4.3     | 26.2  | 17%  | 4.8     | 22.9  | 21% | 3.8     | 16.0  | 24% | 4.7     | 27.3  | 17%  | 5.6     | 19.0  | 29%  | 3.8     | 20.3  | 19%  |
| Si_nor                | 5.8     | 23.4  | 25%  | 4.6     | 22.0  | 21% | 3.6     | 14.8  | 25% | 6.6     | 24.3  | 27%  | 5.0     | 17.5  | 29%  | 4.0     | 17.6  | 22%  |
| Si_sou                | 9.5     | 30.3  | 31%  | 5.5     | 27.1  | 20% | 4.5     | 15.2  | 29% | 5.3     | 19.3  | 28%  | 4.8     | 17.6  | 27%  | 5.7     | 23.0  | 25%  |
| Sr_eas                | 40.4    | 83.2  | 49%  | 41.3    | 152.5 | 27% | 37.9    | 222.9 | 17% | 50.9    | 212.5 | 24%  | 67.6    | 263.4 | 26%  | 39.5    | 104.0 | 38%  |
| Sr_wes                | 43.0    | 122.2 | 35%  | 36.5    | 138.5 | 26% | 45.4    | 311.0 | 15% | 33.9    | 98.2  | 35%  | 48.3    | 155.0 | 31%  | 41.4    | 225.7 | 18%  |
| Sr_nor                | 45.9    | 253.2 | 18%  | 40.1    | 139.3 | 29% | 47.2    | 288.4 | 16% | 57.3    | 149.6 | 38%  | 49.6    | 170.8 | 29%  | 39.4    | 187.8 | 21%  |
| Sr_sou                | 34.3    | 102.6 | 33%  | 49.5    | 96.9  | 51% | 54.7    | 279.9 | 20% | 46.5    | 225.6 | 21%  | 72.7    | 220.3 | 33%  | 34.2    | 131.3 | 26%  |
| Ti_eas                | 4.8     | 18.8  | 25%  | 7.1     | 20.1  | 35% | 4.6     | 16.9  | 27% | 8.0     | 16.6  | 48%  | 19.1    | 18.2  | 105% | 5.4     | 14.8  | 37%  |
| Ti_wes                | 5.5     | 17.2  | 32%  | 5.7     | 15.8  | 36% | 4.3     | 15.8  | 27% | 7.2     | 16.0  | 45%  | 5.9     | 14.0  | 42%  | 6.0     | 15.6  | 38%  |
| Ti_nor                | 5.3     | 17.8  | 30%  | 5.6     | 17.9  | 31% | 4.2     | 16.0  | 26% | 8.0     | 15.7  | 51%  | 5.9     | 13.5  | 44%  | 5.1     | 14.7  | 35%  |
| Ti_sou                | 16.2    | 20.5  | 79%  | 5.9     | 17.1  | 35% | 4.6     | 15.8  | 29% | 6.2     | 16.1  | 39%  | 7.2     | 14.7  | 49%  | 5.9     | 14.1  | 42%  |
| Zn_eas                | 56.9    | 234.2 | 24%  | 40.6    | 235.2 | 17% | 29.9    | 153.1 | 20% | 52.7    | 145.8 | 36%  | 39.1    | 111.7 | 35%  | 33.0    | 185.5 | 18%  |
| Zn_wes                | 27.7    | 214.1 | 13%  | 44.1    | 193.8 | 23% | 27.9    | 155.6 | 18% | 27.5    | 175.9 | 16%  | 35.4    | 155.7 | 23%  | 33.0    | 173.3 | 19%  |
| Zn_nor                | 47.0    | 166.6 | 28%  | 49.5    | 200.6 | 25% | 24.1    | 102.9 | 23% | 34.9    | 173.4 | 20%  | 34.1    | 176.2 | 19%  | 35.2    | 183.9 | 19%  |
| Zn_sou                | 46.7    | 215.8 | 22%  | 53.2    | 229.6 | 23% | 49.9    | 129.1 | 39% | 29.5    | 158.4 | 19%  | 41.6    | 161.0 | 26%  | 24.4    | 193.5 | 13%  |

[illegible]
