# Supplementary material
Source: MDPI journal article supplement (https://www.mdpi.com/1424-2818/15/2/281)
Supplement: s1 [file s1]

Table S1. Correlation matrices.

Correlation matrix - pine #1

[illegible]



[illegible][illegible]

[illegible]

[illegible]

|    |  |
|----|--|
|    |  |
|    |  |
| 28 |  |

| Correlation matrix - pine R6 |             |           |           |           |           |           |           |           |           |           |           |           |           |           |        |        |        |         |        |        |        |         |        |        |        |         |        |        |        |         |        |        |  |
|------------------------------|-------------|-----------|-----------|-----------|-----------|-----------|-----------|-----------|-----------|-----------|-----------|-----------|-----------|-----------|--------|--------|--------|---------|--------|--------|--------|---------|--------|--------|--------|---------|--------|--------|--------|---------|--------|--------|--|
|                              | Ar_ave      | Ar_west   | Ar_ave    | Ar_nor    | Cp_ave    | Cp_west   | Cp_ave    | Cp_nor    | Ci_ave    | Ci_west   | Ci_ave    | Ci_nor    | Cp_ave    | Cp_west   | Cp_ave | Cp_nor | Ci_ave | Ci_west | Ci_ave | Ci_nor | Ar_ave | Ar_west | Ar_ave | Ar_nor | Cp_ave | Cp_west | Cp_ave | Cp_nor | Ci_ave | Ci_west | Ci_ave | Ci_nor |  |
| Ar_ave                       | 1           |           |           |           |           |           |           |           |           |           |           |           |           |           |        |        |        |         |        |        |        |         |        |        |        |         |        |        |        |         |        |        |  |
| Ar_west                      | -0.00950202 | 1         |           |           |           |           |           |           |           |           |           |           |           |           |        |        |        |         |        |        |        |         |        |        |        |         |        |        |        |         |        |        |  |
| Ar_ave                       | -0.144015   | -0.008888 | 1         |           |           |           |           |           |           |           |           |           |           |           |        |        |        |         |        |        |        |         |        |        |        |         |        |        |        |         |        |        |  |
| Ar_nor                       | 0.1081115   | -0.007168 | 0.027778  | 1         |           |           |           |           |           |           |           |           |           |           |        |        |        |         |        |        |        |         |        |        |        |         |        |        |        |         |        |        |  |
| Cp_ave                       | 0.1188435   | -0.110405 | 0.120762  | 0.074769  | 1         |           |           |           |           |           |           |           |           |           |        |        |        |         |        |        |        |         |        |        |        |         |        |        |        |         |        |        |  |
| Cp_west                      | 0.2051769   | -0.110851 | 0.141051  | 0.045137  | 0.048484  | 1         |           |           |           |           |           |           |           |           |        |        |        |         |        |        |        |         |        |        |        |         |        |        |        |         |        |        |  |
| Cp_ave                       | 0.1851547   | -0.113374 | 0.121508  | 0.074762  | 0.043834  | 0.0870078 | 1         |           |           |           |           |           |           |           |        |        |        |         |        |        |        |         |        |        |        |         |        |        |        |         |        |        |  |
| Cp_nor                       | 0.2098891   | -0.109066 | 0.174749  | 0.110619  | 0.048484  | 0.044688  | 0.044688  | 1         |           |           |           |           |           |           |        |        |        |         |        |        |        |         |        |        |        |         |        |        |        |         |        |        |  |
| Ci_ave                       | 0.1851547   | -0.113374 | 0.121508  | 0.074762  | 0.043834  | 0.0870078 | 1         |           |           |           |           |           |           |           |        |        |        |         |        |        |        |         |        |        |        |         |        |        |        |         |        |        |  |
| Ci_west                      | 0.1277645   | -0.090451 | 0.012411  | 0.110811  | 0.110811  | 0.111111  | 0.110811  | 1         |           |           |           |           |           |           |        |        |        |         |        |        |        |         |        |        |        |         |        |        |        |         |        |        |  |
| Ci_ave                       | 0.1188435   | -0.007168 | 0.027778  | 0.074769  | 0.048484  | 0.044688  | 0.044688  | 1         |           |           |           |           |           |           |        |        |        |         |        |        |        |         |        |        |        |         |        |        |        |         |        |        |  |
| Ci_nor                       | 0.0017978   | 0.000485  | 0.0137428 | 0.006108  | 0.101451  | 0.101451  | 0.101451  | 0.101451  | 1         |           |           |           |           |           |        |        |        |         |        |        |        |         |        |        |        |         |        |        |        |         |        |        |  |
| Cp_ave                       | 0.0660188   | -0.017648 | 0.1068709 | 0.0796944 | 0.0416153 | 0.0781131 | 0.0781131 | 0.0781131 | 0.0781131 | 1         |           |           |           |           |        |        |        |         |        |        |        |         |        |        |        |         |        |        |        |         |        |        |  |
| Cp_west                      | 0.0009112   | -0.017648 | 0.0017328 | 0.0011111 | -0.000018 | 0.113108  | 0.113108  | 0.113108  | 0.113108  | 0.113108  | 1         |           |           |           |        |        |        |         |        |        |        |         |        |        |        |         |        |        |        |         |        |        |  |
| Cp_ave                       | 0.1474689   | -0.104118 | 0.0386776 | 0.0211886 | 0.1088074 | 0.1049117 | 0.1079744 | 0.1142187 | -0.079408 | 0.0880174 | 0.1144891 | 0.1174761 | 0.1174881 | 0.0777981 |        |        |        |         |        |        |        |         |        |        |        |         |        |        |        |         |        |        |  |
| Ci_ave                       | 0.0017978   | 0.000485  | 0.0137428 | 0.006108  | 0.101451  | 0.101451  | 0.101451  | 0.101451  | 0.101451  | 0.101451  | 1         |           |           |           |        |        |        |         |        |        |        |         |        |        |        |         |        |        |        |         |        |        |  |
| Ci_west                      | 0.1081115   | -0.007168 | 0.027778  | 0.074769  | 0.048484  | 0.044688  | 0.044688  | 1         |           |           |           |           |           |           |        |        |        |         |        |        |        |         |        |        |        |         |        |        |        |         |        |        |  |
| Ci_ave                       | 0.1188435   | -0.007168 | 0.027778  | 0.074769  | 0.048484  | 0.044688  | 0.044688  | 1         |           |           |           |           |           |           |        |        |        |         |        |        |        |         |        |        |        |         |        |        |        |         |        |        |  |
| Ci_nor                       | 0.0017978   | 0.000485  | 0.0137428 | 0.006108  | 0.101451  | 0.101451  | 0.101451  | 0.101451  | 1         |           |           |           |           |           |        |        |        |         |        |        |        |         |        |        |        |         |        |        |        |         |        |        |  |
| Cp_ave                       | 0.1081115   | -0.007168 | 0.027778  | 0.074769  | 0.048484  | 0.044688  | 0.044688  | 1         |           |           |           |           |           |           |        |        |        |         |        |        |        |         |        |        |        |         |        |        |        |         |        |        |  |
| Cp_west                      | 0.0009112   | -0.017648 | 0.0017328 | 0.0011111 | -0.000018 | 0.113108  | 0.113108  | 0.113108  | 0.113108  | 0.113108  | 1         |           |           |           |        |        |        |         |        |        |        |         |        |        |        |         |        |        |        |         |        |        |  |
| Cp_ave                       | 0.1474689   | -0.104118 | 0.0386776 | 0.0211886 | 0.1088074 | 0.1049117 | 0.1079744 | 0.1142187 | -0.079408 | 0.0880174 | 0.1144891 | 0.1174761 | 0.1174881 | 0.0777981 |        |        |        |         |        |        |        |         |        |        |        |         |        |        |        |         |        |        |  |
| Ci_ave                       | 0.0017978   | 0.000485  | 0.0137428 | 0.006108  | 0.101451  | 0.101451  | 0.101451  | 0.101451  | 0.101451  | 0.101451  | 1         |           |           |           |        |        |        |         |        |        |        |         |        |        |        |         |        |        |        |         |        |        |  |
| Ci_west                      | 0.1081115   | -0.007168 | 0.027778  | 0.074769  | 0.048484  | 0.044688  | 0.044688  | 1         |           |           |           |           |           |           |        |        |        |         |        |        |        |         |        |        |        |         |        |        |        |         |        |        |  |
| Ci_ave                       | 0.1188435   | -0.007168 | 0.027778  | 0.074769  | 0.048484  | 0.044688  | 0.044688  | 1         |           |           |           |           |           |           |        |        |        |         |        |        |        |         |        |        |        |         |        |        |        |         |        |        |  |
| Ci_nor                       | 0.0017978   | 0.000485  | 0.0137428 | 0.006108  | 0.101451  | 0.101451  | 0.101451  | 0.101451  | 0.101451  | 0.101451  | 1         |           |           |           |        |        |        |         |        |        |        |         |        |        |        |         |        |        |        |         |        |        |  |
| Cp_ave                       | 0.1081115   | -0.007168 | 0.027778  | 0.074769  | 0.048484  | 0.044688  | 0.044688  | 1         |           |           |           |           |           |           |        |        |        |         |        |        |        |         |        |        |        |         |        |        |        |         |        |        |  |
| Cp_west                      | 0.0009112   | -0.017648 | 0.0017328 | 0.0011111 | -0.000018 | 0.113108  | 0.113108  | 0.113108  | 0.113108  | 0.113108  | 1         |           |           |           |        |        |        |         |        |        |        |         |        |        |        |         |        |        |        |         |        |        |  |
| Cp_ave                       | 0.1474689   | -0.104118 | 0.0386776 | 0.0211886 | 0.1088074 | 0.1049117 | 0.1079744 | 0.1142187 | -0.079408 | 0.0880174 | 0.1144891 | 0.1174761 | 0.1174881 | 0.0777981 |        |        |        |         |        |        |        |         |        |        |        |         |        |        |        |         |        |        |  |
| Ci_ave                       | 0.0017978   | 0.000485  | 0.0137428 | 0.006108  | 0.101451  | 0.101451  | 0.101451  | 0.101451  | 0.101451  | 0.101451  | 1         |           |           |           |        |        |        |         |        |        |        |         |        |        |        |         |        |        |        |         |        |        |  |
| Ci_west                      | 0.1081115   | -0.007168 | 0.027778  | 0.074769  | 0.048484  | 0.044688  | 0.044688  | 1         |           |           |           |           |           |           |        |        |        |         |        |        |        |         |        |        |        |         |        |        |        |         |        |        |  |
| Ci_ave                       | 0.1188435   | -0.007168 | 0.027778  | 0.074769  | 0.048484  | 0.044688  | 0.044688  | 1         |           |           |           |           |           |           |        |        |        |         |        |        |        |         |        |        |        |         |        |        |        |         |        |        |  |
| Ci_nor                       | 0.0017978   | 0.000485  | 0.0137428 | 0.006108  | 0.101451  | 0.101451  | 0.101451  | 0.101451  | 0.101451  | 0.101451  | 1         |           |           |           |        |        |        |         |        |        |        |         |        |        |        |         |        |        |        |         |        |        |  |
| Cp_ave                       | 0.1081115   | -0.007168 | 0.027778  | 0.074769  | 0.048484  | 0.044688  | 0.044688  | 1         |           |           |           |           |           |           |        |        |        |         |        |        |        |         |        |        |        |         |        |        |        |         |        |        |  |
| Cp_west                      | 0.0009112   | -0.017648 | 0.0017328 | 0.0011111 | -0.000018 | 0.113108  | 0.113108  | 0.113108  | 0.113108  | 0.113108  | 1         |           |           |           |        |        |        |         |        |        |        |         |        |        |        |         |        |        |        |         |        |        |  |
| Cp_ave                       | 0.1474689   | -0.104118 | 0.0386776 | 0.0211886 | 0.1088074 | 0.1049117 | 0.1079744 | 0.1142187 | -0.079408 | 0.0880174 | 0.1144891 | 0.1174761 | 0.1174881 | 0.0777981 |        |        |        |         |        |        |        |         |        |        |        |         |        |        |        |         |        |        |  |
| Ci_ave                       | 0.0017978   | 0.000485  | 0.0137428 | 0.006108  | 0.101451  | 0.101451  | 0.101451  | 0.101451  | 0.101451  | 0.101451  | 1         |           |           |           |        |        |        |         |        |        |        |         |        |        |        |         |        |        |        |         |        |        |  |
| Ci_west                      | 0.1081115   | -0.007168 | 0.027778  | 0.074769  | 0.048484  | 0.044688  | 0.044688  | 1         |           |           |           |           |           |           |        |        |        |         |        |        |        |         |        |        |        |         |        |        |        |         |        |        |  |
| Ci_ave                       | 0.1188435   | -0.007168 | 0.027778  | 0.074769  | 0.048484  | 0.044688  | 0.044688  | 1         |           |           |           |           |           |           |        |        |        |         |        |        |        |         |        |        |        |         |        |        |        |         |        |        |  |
| Ci_nor                       | 0.0017978   | 0.000485  | 0.0137428 | 0.006108  | 0.101451  | 0.101451  | 0.101451  | 0.101451  | 0.101451  | 0.101451  | 1         |           |           |           |        |        |        |         |        |        |        |         |        |        |        |         |        |        |        |         |        |        |  |
| Cp_ave                       | 0.1081115   | -0.007168 | 0.027778  | 0.074769  | 0.048484  | 0.044688  | 0.044688  | 1         |           |           |           |           |           |           |        |        |        |         |        |        |        |         |        |        |        |         |        |        |        |         |        |        |  |
| Cp_west                      | 0.0009112   | -0.017648 | 0.0017328 | 0.0011111 | -0.000018 | 0.113108  | 0.113108  | 0.113108  | 0.113108  | 0.113108  | 1         |           |           |           |        |        |        |         |        |        |        |         |        |        |        |         |        |        |        |         |        |        |  |
| Cp_ave                       | 0.1474689   | -0.104118 | 0.0386776 | 0.0211886 | 0.1088074 | 0.1049117 | 0.1079744 | 0.1142187 | -0.079408 | 0.0880174 | 0.1144891 | 0.1174761 | 0.1174881 | 0.0777981 |        |        |        |         |        |        |        |         |        |        |        |         |        |        |        |         |        |        |  |
| Ci_ave                       | 0.0017978   | 0.000485  | 0.0137428 | 0.006108  | 0.101451  | 0.101451  | 0.101451  | 0.101451  | 0.101451  | 0.101451  | 1         |           |           |           |        |        |        |         |        |        |        |         |        |        |        |         |        |        |        |         |        |        |  |
| Ci_west                      | 0.1081115   | -0.007168 | 0.027778  | 0.074769  | 0.048484  | 0.044688  | 0.044688  | 1         |           |           |           |           |           |           |        |        |        |         |        |        |        |         |        |        |        |         |        |        |        |         |        |        |  |
| Ci_ave                       | 0.1188435   | -0.007168 | 0.027778  | 0.074769  | 0.048484  | 0.044688  | 0.044688  | 1         |           |           |           |           |           |           |        |        |        |         |        |        |        |         |        |        |        |         |        |        |        |         |        |        |  |
| Ci_nor                       | 0.0017978   | 0.000485  | 0.0137428 | 0.006108  | 0.101451  | 0.101451  | 0.101451  | 0.101451  | 0.101451  | 0.101451  | 1         |           |           |           |        |        |        |         |        |        |        |         |        |        |        |         |        |        |        |         |        |        |  |
| Cp_ave                       | 0.1081115   | -0.007168 | 0.027778  | 0.074769  | 0.048484  | 0.044688  | 0.044688  | 1         |           |           |           |           |           |           |        |        |        |         |        |        |        |         |        |        |        |         |        |        |        |         |        |        |  |
| Cp_west                      | 0.0009112   | -0.017648 | 0.0017328 | 0.0011111 | -0.000018 | 0.113108  | 0.113108  | 0.113108  | 0.113108  | 0.113108  | 1         |           |           |           |        |        |        |         |        |        |        |         |        |        |        |         |        |        |        |         |        |        |  |
| Cp_ave                       | 0.1474689   | -0.104118 | 0.0386776 | 0.0211886 | 0.1088074 | 0.1049117 | 0.1079744 | 0.1142187 | -0.079408 | 0.0880174 | 0.1144891 | 0.1174761 | 0.1174881 | 0.0777981 |        |        |        |         |        |        |        |         |        |        |        |         |        |        |        |         |        |        |  |
| Ci_ave                       | 0.0017978   | 0.000485  | 0.0137428 | 0.006108  | 0.101451  | 0.101451  | 0.101451  | 0.101451  | 0.101451  | 0.101451  | 1         |           |           |           |        |        |        |         |        |        |        |         |        |        |        |         |        |        |        |         |        |        |  |
| Ci_west                      | 0.1081115   | -0.007168 | 0.027778  | 0.074769  | 0.048484  | 0.044688  | 0.044688  | 1         |           |           |           |           |           |           |        |        |        |         |        |        |        |         |        |        |        |         |        |        |        |         |        |        |  |
| Ci_ave                       | 0.1188435   | -0.007168 | 0.027778  | 0.074769  | 0.048484  | 0.044688  | 0.044688  | 1         |           |           |           |           |           |           |        |        |        |         |        |        |        |         |        |        |        |         |        |        |        |         |        |        |  |
| Ci_nor                       | 0.0017978   | 0.000485  | 0.0137428 | 0.006108  |           |           |           |           |           |           |           |           |           |           |        |        |        |         |        |        |        |         |        |        |        |         |        |        |        |         |        |        |  |
